# Supplementary material
Source: Research Square preprint supplement (doi:10.21203/rs.3.rs-9393052/v1)
Supplement: Supplementary file 1 [file 06657cb1908b0230ec973587.docx]

**Appendix**

**Table A1. Descriptive Statistics**

| Variable | Obs | Mean | Median | Std Dev | Min | Max | Skewness | Kurtosis | ADF (p-val) | Cross-sect. Corr. w/ FRAG | Data Quality Score |
| --- | --- | --- | --- | --- | --- | --- | --- | --- | --- | --- | --- |
| 10Y Sovereign Yield (%) | 840 | 3,82 | 3,45 | 2,18 | -0,5 | 8,5 | 0,62 | 3,21 | 0,042 | 0.58*** | High |
| CDS Spread (bps) | 840 | 135,2 | 85 | 148,3 | 4 | 550 | 1,82 | 5,84 | 0,031 | 0.71*** | High |
| Fragmentation Index (0-1) | 840 | 0,41 | 0,38 | 0,18 | 0,13 | 0,82 | 0,38 | 2,45 | 0,018 | 1.00 | High |
| GeoPol Risk Index (GPR) | 840 | 178,5 | 155,2 | 68,4 | 88 | 412 | 1,12 | 3,98 | 0,025 | 0.82*** | High |
| Trade Policy Uncertainty | 840 | 195,8 | 165 | 88,5 | 72 | 485 | 1,35 | 4,52 | 0,033 | 0.76*** | High |
| EU-US Trade Intensity (%) | 840 | 24,2 | 24,8 | 3,85 | 15,5 | 32,5 | -0,28 | 2,38 | 0,055 | -0.65*** | High |
| Supply Chain Conc. Idx | 840 | 0,68 | 0,66 | 0,09 | 0,52 | 0,88 | 0,45 | 2,85 | 0,048 | 0.72*** | Medium |
| Reshoring Indicator | 840 | 0,18 | 0,15 | 0,12 | 0,01 | 0,52 | 1,05 | 3,78 | 0,062 | 0.81*** | Medium |
| GDP Growth (%, QoQ) | 840 | 0,38 | 0,48 | 0,75 | -4,5 | 3,8 | -1,82 | 9,45 | 0,001 | -0.42*** | High |
| Inflation (CPI, %) | 840 | 2,35 | 1,95 | 2,18 | -0,8 | 11,5 | 1,42 | 4,98 | 0,038 | 0.35*** | High |
| VIX | 840 | 19,8 | 17,5 | 9,25 | 9,5 | 82,7 | 2,42 | 9,82 | 0,003 | 0.62*** | High |
| Fiscal Balance (% GDP) | 840 | -3,52 | -3,12 | 2,45 | -16 | 3,5 | -0,65 | 3,42 | 0,058 | -0.55*** | High |
| Government Debt (% GDP) | 840 | 92,5 | 90,2 | 32,8 | 52 | 180 | 0,58 | 2,85 | 0,045 | 0.48*** | High |
| EUR/USD Rate | 840 | 1,15 | 1,14 | 0,1 | 0,96 | 1,58 | 0,12 | 2,38 | 0,072 | 0.08 | High |
