# Supplementary material
Source: Research Square preprint supplement (doi:10.21203/rs.3.rs-9393052/v1)
Supplement: Supplementary file 2 [file 7aaa04abef40b42d466eaceb.xlsx]

## Sheet: Panel A
Country/Region	Quarter	10Y Sov. Yield (%)	CDS Spread (bps)	Yield Spread vs Bund (bps)	Sovereign Risk Score (0–10)	Fiscal Balance (% GDP)	Govt Debt (% GDP)	Debt Service Ratio (%)	Foreign Holdings (%)	S&P Rating (Num)	Moody's Rating (Num)
United States	2005 Q1	4.4	30	100	1.4	-2.6	62	2.7	38	20	19
United States	2005 Q2	4.2	28	60	1.3	-2.5	63	2.6	40.4	20	19
United States	2005 Q3	5	32	100	1.2	-1.9	63	3.1	42.5	20	19
United States	2005 Q4	4.8	30	90	1	-1.4	63	3	44.3	20	19
United States	2006 Q1	4.7	29	90	1	-1.2	63	3	45.5	20	19
United States	2006 Q2	4.6	28	100	1	-1	63	2.9	46	20	19
United States	2006 Q3	4.6	27	70	1	-1.2	64	2.9	45.8	20	19
United States	2006 Q4	4.6	28	40	1.4	-2.8	65	3	44.9	20	19
United States	2007 Q1	4.7	30	50	1.6	-3.2	66	3.1	43.4	20	19
United States	2007 Q2	4.5	45	50	4.2	-10.5	73	3.3	41.4	20	19
United States	2007 Q3	4	65	70	4.1	-9	82	3.3	39.1	20	19
United States	2007 Q4	3.5	55	30	3.6	-8	90	3.1	36.7	20	19
United States	2008 Q1	2.7	50	0	3.1	-6.8	98	2.6	34.5	20	19
United States	2008 Q2	2.6	48	20	2.6	-5.4	103	2.7	32.5	19	18
United States	2008 Q3	2.5	45	70	2.2	-4.4	106	2.6	31	19	18
United States	2008 Q4	2.4	42	120	1.9	-3.5	108	2.6	30.2	19	18
United States	2009 Q1	2.5	42	160	1.8	-3.2	105	2.6	30	19	18
United States	2009 Q2	2.2	40	130	1.7	-3.1	104	2.3	30.6	19	18
United States	2009 Q3	3.4	50	210	2.1	-3.9	106	3.6	31.8	19	18
United States	2009 Q4	4.7	85	270	3	-4.7	108	5.1	33.6	19	18
United States	2010 Q1	4	70	220	2.7	-4.6	109	4.4	35.8	19	18
United States	2010 Q2	3.9	65	220	2.6	-4.5	110	4.3	38.1	19	18
United States	2010 Q3	3.8	60	230	2.5	-4.4	111	4.2	40.5	19	18
United States	2010 Q4	3.8	58	250	2.4	-4.3	112	4.3	42.6	19	18
United States	2011 Q1	3.3	55	210	2.2	-4	104	3.4	44.3	19	18
United States	2011 Q2	3.7	60	230	2.3	-3.8	103	3.8	45.5	19	18
United States	2011 Q3	3.7	62	210	2.2	-3.6	102	3.8	46	19	18
United States	2011 Q4	3.8	65	200	2.2	-3.5	101	3.8	45.8	19	18
United States	2012 Q1	3.9	68	190	2.3	-3.5	102	4	44.8	19	18
United States	2012 Q2	4	70	180	2.3	-3.4	103	4.1	43.3	19	18
United States	2012 Q3	4.1	72	170	2.3	-3.4	104	4.3	41.3	19	18
United States	2012 Q4	3.2	55	140	2.2	-3.8	105	3.4	39	19	18
United States	2013 Q1	3	50	150	2.2	-4	106	3.2	36.6	19	18
United States	2013 Q2	2.7	45	150	2.2	-4.2	107	2.9	34.3	19	18
United States	2013 Q3	2.4	40	140	2.1	-4.2	107	2.6	32.4	19	18
United States	2013 Q4	2.2	38	130	1.9	-3.9	106	2.3	31	19	18
United States	2014 Q1	2.2	38	140	1.9	-3.8	106	2.3	30.2	19	18
United States	2014 Q2	2	35	140	1.8	-3.5	105	2.1	30	19	18
United States	2014 Q3	2.3	40	160	1.8	-3.5	106	2.4	30.6	19	18
United States	2014 Q4	2.7	45	180	2	-3.8	107	2.9	31.9	19	18
United States	2015 Q1	2.8	48	180	2.1	-4	108	3	33.7	19	18
United States	2015 Q2	2.6	45	180	2	-3.9	107	2.8	35.9	19	18
United States	2015 Q3	2.5	42	190	2	-3.8	107	2.7	38.3	19	18
United States	2015 Q4	2.4	40	200	1.9	-3.8	107	2.6	40.6	19	18
United States	2016 Q1	2	35	180	1.8	-3.5	107	2.1	42.7	19	18
United States	2016 Q2	1.8	30	190	1.6	-3.4	107	1.9	44.4	19	18
United States	2016 Q3	1.8	28	190	1.6	-3.3	106	1.9	45.5	19	18
United States	2016 Q4	1.9	30	190	1.7	-3.5	107	2	46	19	18
United States	2017 Q1	2.1	32	200	1.9	-4	107	2.2	45.7	19	18
United States	2017 Q2	2.4	38	210	2.1	-4.5	108	2.6	44.8	19	18
United States	2017 Q3	2.6	42	210	6	-15.8	127	3.3	43.2	19	18
United States	2017 Q4	2.9	48	220	5.5	-14	130	3.8	41.2	19	18
United States	2018 Q1	3	52	220	4.9	-12	128	3.8	38.9	19	18
United States	2018 Q2	2.9	50	210	4.5	-11	126	3.7	36.5	19	18
United States	2018 Q3	0.7	15	120	4.4	-12.5	125	0.9	34.2	19	18
United States	2018 Q4	0.6	12	100	3.9	-11	125	0.8	32.3	19	18
United States	2019 Q1	0.8	14	100	3.6	-10	124	1	30.9	19	18
United States	2019 Q2	1.2	18	110	3.1	-8.5	123	1.5	30.1	19	18
United States	2019 Q3	1.5	22	120	2.7	-7	122	1.8	30.1	19	18
United States	2019 Q4	1.6	25	120	2.6	-6.5	121	1.9	30.7	19	18
United States	2020 Q1	1.7	28	120	2.3	-5.5	120	2	32	19	18
United States	2020 Q2	1.9	32	120	2.3	-5.2	119	2.3	33.8	19	18
United States	2020 Q3	2.3	40	130	2.3	-5	118	2.7	36	19	18
United States	2020 Q4	2.9	50	130	2.7	-5.5	118	3.4	38.4	19	18
United States	2021 Q1	3.9	65	150	3.1	-6	119	4.6	40.7	19	18
United States	2021 Q2	4.3	70	150	3.3	-6.5	120	5.2	42.8	19	18
United States	2021 Q3	4	65	140	3.3	-6.8	121	4.8	44.5	19	18
United States	2021 Q4	3.8	60	140	3.3	-7	122	4.6	45.6	19	18
United States	2022 Q1	3.7	55	150	3.3	-7.2	123	4.6	46	19	18
United States	2022 Q2	4	62	160	3.4	-7	122	4.9	45.7	19	18
United States	2022 Q3	4.2	68	160	3.3	-6.5	121	5.1	44.7	19	18
United States	2022 Q4	4.5	75	170	3.3	-6.2	120	5.4	43.1	19	18
United States	2023 Q1	4.7	80	170	3.3	-6	120	5.6	41.1	19	18
United States	2023 Q2	4.8	82	170	3.3	-5.8	121	5.8	38.7	19	18
United States	2023 Q3	4.5	75	170	3.1	-5.5	122	5.5	36.3	19	18
United States	2023 Q4	4.3	70	170	2.9	-5.2	122	5.2	34.1	19	18
United States	2024 Q1	4.2	68	180	2.8	-5	121	5.1	32.2	19	18
United States	2024 Q2	4.1	65	190	2.7	-4.8	120	4.9	30.8	19	18
United States	2024 Q3	4	62	200	2.6	-4.6	119	4.8	30.1	19	18
United States	2024 Q4	3.9	60	200	2.5	-4.5	119	4.6	30.1	19	18
United States	2025 Q1	4.1	62	210	2.5	-4.4	120	4.9	30.8	19	18
United States	2025 Q2	4.3	65	210	2.5	-4.3	121	5.2	32.1	19	18
United States	2025 Q3	4.4	68	200	2.5	-4.2	122	5.4	33.9	19	18
United States	2025 Q4	4.2	65	160	2.4	-4	123	5.2	36.2	19	18
Euro Area (Agg.)	2005 Q1	2.5	50	-90	1.9	-3.3	86	2.1	30	18	17
Euro Area (Agg.)	2005 Q2	2.61	50	-99	1.9	-3.1	84	2.2	32.4	18	17
Euro Area (Agg.)	2005 Q3	2.24	52	-176	1.7	-2.5	87	1.9	34.5	18	17
Euro Area (Agg.)	2005 Q4	2.51	50	-139	1.5	-2.1	83	2.1	36.3	18	17
Euro Area (Agg.)	2006 Q1	2.83	43	-97	1.7	-2.9	88	2.5	37.5	18	17
Euro Area (Agg.)	2006 Q2	2.15	39	-145	1.5	-2.5	83	1.8	38	18	17
Euro Area (Agg.)	2006 Q3	1.7	32	-220	1.4	-2.7	85	1.4	37.8	18	17
Euro Area (Agg.)	2006 Q4	1.74	32	-246	1.2	-2.1	86	1.5	36.9	18	17
Euro Area (Agg.)	2007 Q1	1.63	43	-257	1.7	-3	82	1.3	35.4	18	17
Euro Area (Agg.)	2007 Q2	1.62	39	-238	1.4	-2.3	85	1.4	33.4	18	17
Euro Area (Agg.)	2007 Q3	1.33	34	-197	1.7	-3.5	86	1.1	31.1	18	17
Euro Area (Agg.)	2007 Q4	1.63	38	-157	1.5	-2.5	85	1.4	28.7	18	17
Euro Area (Agg.)	2008 Q1	1.91	41	-79	1.8	-3.4	82	1.6	26.5	18	17
Euro Area (Agg.)	2008 Q2	1.93	41	-47	1.5	-2.5	87	1.7	24.5	18	17
Euro Area (Agg.)	2008 Q3	2.32	34	52	1.4	-2.5	85	2	23	18	17
Euro Area (Agg.)	2008 Q4	2.49	34	129	1.8	-3.7	85	2.1	22.2	18	17
Euro Area (Agg.)	2009 Q1	2.19	39	129	1.6	-2.9	84	1.8	22	18	17
Euro Area (Agg.)	2009 Q2	2.32	29	142	1.1	-2	86	2	22.6	18	17
Euro Area (Agg.)	2009 Q3	1.98	25	68	1.2	-2.3	84	1.7	23.8	18	17
Euro Area (Agg.)	2009 Q4	2.29	10	29	1.2	-3.2	83	1.9	25.6	18	17
Euro Area (Agg.)	2010 Q1	2.27	5	47	1.3	-3.7	86	2	27.8	18	17
Euro Area (Agg.)	2010 Q2	2.2	5	50	1.1	-3.2	86	1.9	30.1	18	17
Euro Area (Agg.)	2010 Q3	1.97	5	47	1.2	-3.4	88	1.7	32.5	18	17
Euro Area (Agg.)	2010 Q4	2.39	5	109	1.3	-3.8	85	2	34.6	18	17
Euro Area (Agg.)	2011 Q1	2.34	7	114	1.1	-2.9	84	2	36.3	18	17
Euro Area (Agg.)	2011 Q2	2.19	8	79	1	-2.1	85	1.9	37.5	18	17
Euro Area (Agg.)	2011 Q3	2.07	7	47	1.2	-3.2	83	1.7	38	18	17
Euro Area (Agg.)	2011 Q4	2.25	5	45	1	-2.7	82	1.8	37.8	18	17
Euro Area (Agg.)	2012 Q1	2.38	5	38	1.2	-3.5	85	2	36.8	18	17
Euro Area (Agg.)	2012 Q2	2.53	5	33	1	-2.6	86	2.2	35.3	18	17
Euro Area (Agg.)	2012 Q3	2.68	6	28	1.1	-3	87	2.3	33.3	18	17
Euro Area (Agg.)	2012 Q4	3.43	5	163	1	-2.4	85	2.9	31	18	17
Euro Area (Agg.)	2013 Q1	3.28	5	178	1	-2.5	83	2.7	28.6	18	17
Euro Area (Agg.)	2013 Q2	3.1	5	190	1	-2.1	82	2.5	26.3	18	17
Euro Area (Agg.)	2013 Q3	2.82	5	182	1.1	-3.2	87	2.5	24.4	18	17
Euro Area (Agg.)	2013 Q4	3.04	13	214	1	-2.3	85	2.6	23	18	17
Euro Area (Agg.)	2014 Q1	3.43	7	263	1.2	-3.4	83	2.8	22.2	18	17
Euro Area (Agg.)	2014 Q2	3.39	7	279	1	-2.7	87	2.9	22	18	17
Euro Area (Agg.)	2014 Q3	3.1	14	240	1.1	-2.6	84	2.6	22.6	18	17
Euro Area (Agg.)	2014 Q4	2.81	9	191	1.1	-3	85	2.4	23.9	18	17
Euro Area (Agg.)	2015 Q1	3.04	8	204	1	-2.6	83	2.5	25.7	18	17
Euro Area (Agg.)	2015 Q2	3.3	9	250	1.3	-3.4	84	2.8	27.9	18	17
Euro Area (Agg.)	2015 Q3	3.49	10	289	1.2	-3.2	85	3	30.3	18	17
Euro Area (Agg.)	2015 Q4	3.25	5	285	1	-2.5	84	2.7	32.6	18	17
Euro Area (Agg.)	2016 Q1	3.33	6	313	1	-2.5	86	2.9	34.7	18	17
Euro Area (Agg.)	2016 Q2	3.38	16	348	1.3	-3	85	2.9	36.4	18	17
Euro Area (Agg.)	2016 Q3	3.45	5	355	1.1	-2.9	86	3	37.5	18	17
Euro Area (Agg.)	2016 Q4	3.76	12	376	1	-2.4	87	3.3	38	18	17
Euro Area (Agg.)	2017 Q1	3.83	13	373	1.1	-2.7	83	3.2	37.7	18	17
Euro Area (Agg.)	2017 Q2	4.07	8	377	1	-1.6	85	3.5	36.8	18	17
Euro Area (Agg.)	2017 Q3	4.1	24	360	1.4	-2.9	83	3.4	35.2	18	17
Euro Area (Agg.)	2017 Q4	4.2	30	350	1.6	-3.4	85	3.6	33.2	18	17
Euro Area (Agg.)	2018 Q1	4.42	20	362	1.2	-2.7	86	3.8	30.9	18	17
Euro Area (Agg.)	2018 Q2	3.91	21	311	1	-2	84	3.3	28.5	18	17
Euro Area (Agg.)	2018 Q3	3.8	25	430	1.2	-2.3	84	3.2	26.2	18	17
Euro Area (Agg.)	2018 Q4	3.63	24	403	1.1	-2.2	85	3.1	24.3	18	17
Euro Area (Agg.)	2019 Q1	3.41	29	361	1.7	-3.5	87	3	22.9	18	17
Euro Area (Agg.)	2019 Q2	3.31	29	321	1.1	-1.7	81	2.7	22.1	18	17
Euro Area (Agg.)	2019 Q3	3.84	34	354	1.4	-2.5	85	3.3	22.1	18	17
Euro Area (Agg.)	2019 Q4	3.53	46	313	1.9	-3.3	85	3	22.7	18	17
Euro Area (Agg.)	2020 Q1	3.87	40	337	1.7	-3.1	84	3.3	24	18	17
Euro Area (Agg.)	2020 Q2	3.28	42	258	2	-3.8	87	2.9	25.8	18	17
Euro Area (Agg.)	2020 Q3	3.16	38	216	1.4	-2.2	86	2.7	28	18	17
Euro Area (Agg.)	2020 Q4	3.22	39	162	1.6	-2.9	86	2.8	30.4	18	17
Euro Area (Agg.)	2021 Q1	3.43	30	103	1.6	-3.2	85	2.9	32.7	18	17
Euro Area (Agg.)	2021 Q2	3.68	25	88	1.2	-2.5	82	3	34.8	18	17
Euro Area (Agg.)	2021 Q3	3.95	24	135	1.5	-3.3	83	3.3	36.5	18	17
Euro Area (Agg.)	2021 Q4	3.83	31	143	1.6	-3.2	84	3.2	37.6	18	17
Euro Area (Agg.)	2022 Q1	3.67	40	147	1.4	-2.3	86	3.2	38	18	17
Euro Area (Agg.)	2022 Q2	3.97	29	157	1.2	-2.3	88	3.5	37.7	18	17
Euro Area (Agg.)	2022 Q3	3.9	23	130	1	-1.9	86	3.4	36.7	18	17
Euro Area (Agg.)	2022 Q4	3.46	28	66	1.3	-2.5	84	2.9	35.1	18	17
Euro Area (Agg.)	2023 Q1	3.06	12	6	1	-2.5	85	2.6	33.1	18	17
Euro Area (Agg.)	2023 Q2	2.74	8	-36	1.2	-3.3	85	2.3	30.7	18	17
Euro Area (Agg.)	2023 Q3	2.91	8	11	1.3	-3.6	88	2.6	28.3	18	17
Euro Area (Agg.)	2023 Q4	2.96	18	36	1.4	-3.3	85	2.5	26.1	18	17
Euro Area (Agg.)	2024 Q1	3.2	23	80	1.2	-2.5	85	2.7	24.2	18	17
Euro Area (Agg.)	2024 Q2	3.05	21	85	1.2	-2.7	86	2.6	22.8	18	17
Euro Area (Agg.)	2024 Q3	3.11	18	111	1.5	-3.6	86	2.7	22.1	18	17
Euro Area (Agg.)	2024 Q4	3.33	16	143	1.2	-2.7	86	2.9	22.1	18	17
Euro Area (Agg.)	2025 Q1	3.22	28	122	1.5	-3	84	2.7	22.8	18	17
Euro Area (Agg.)	2025 Q2	3.38	24	118	1.5	-3.2	85	2.9	24.1	18	17
Euro Area (Agg.)	2025 Q3	3.15	22	75	1.2	-2.5	85	2.7	25.9	18	17
Euro Area (Agg.)	2025 Q4	3.02	25	42	1.3	-2.8	86	2.6	28.2	18	17
Germany	2005 Q1	3.4	5	0	1.2	3.4	67	2.3	35	21	20
Germany	2005 Q2	3.6	5	0	1	-1.7	68	2.4	37.4	21	20
Germany	2005 Q3	4	5	0	1	-1.7	67	2.7	39.5	21	20
Germany	2005 Q4	3.9	5	0	1	-0.2	66	2.6	41.3	21	20
Germany	2006 Q1	3.8	5	0	1	0.3	65	2.5	42.5	21	20
Germany	2006 Q2	3.6	5	0	1	0.3	66	2.4	43	21	20
Germany	2006 Q3	3.9	5	0	1	1.7	65	2.5	42.8	21	20
Germany	2006 Q4	4.2	5	0	1	-0.2	63	2.6	41.9	21	20
Germany	2007 Q1	4.2	6	0	1	-0.1	64	2.7	40.4	21	20
Germany	2007 Q2	4	6	0	1.1	-3	72	2.9	38.4	21	20
Germany	2007 Q3	3.3	7	0	1.5	-4.2	82	2.7	36.1	21	20
Germany	2007 Q4	3.2	6	0	1	-0.9	79	2.5	33.7	21	20
Germany	2008 Q1	2.7	6	0	1	-0.1	79	2.1	31.5	21	20
Germany	2008 Q2	2.4	5	0	1	0	78	1.9	29.5	21	20
Germany	2008 Q3	1.8	5	0	1	0.6	74	1.3	28	21	20
Germany	2008 Q4	1.2	5	0	1	0.8	71	0.9	27.2	21	20
Germany	2009 Q1	0.9	5	0	1	1.2	68	0.6	27	21	20
Germany	2009 Q2	0.9	5	0	1	1.3	65	0.6	27.6	21	20
Germany	2009 Q3	1.3	5	0	1	1.8	63	0.8	28.8	21	20
Germany	2009 Q4	2	6	0	1	1.5	60	1.2	30.6	21	20
Germany	2010 Q1	1.8	7	0	1	2	59	1.1	32.8	21	20
Germany	2010 Q2	1.7	6	0	1	2.3	58	1	35.1	21	20
Germany	2010 Q3	1.5	6	0	1	2.5	57	0.9	37.5	21	20
Germany	2010 Q4	1.3	6	0	1	2.4	57	0.7	39.6	21	20
Germany	2011 Q1	1.2	6	0	1	1.9	58	0.7	41.3	21	20
Germany	2011 Q2	1.4	6	0	1	1.5	59	0.8	42.5	21	20
Germany	2011 Q3	1.6	6	0	1	1.4	60	1	43	21	20
Germany	2011 Q4	1.8	6	0	1	1.3	61	1.1	42.8	21	20
Germany	2012 Q1	2	6	0	1	1.3	61	1.2	41.8	21	20
Germany	2012 Q2	2.2	6	0	1	1.5	62	1.4	40.3	21	20
Germany	2012 Q3	2.4	6	0	1	1.8	63	1.5	38.3	21	20
Germany	2012 Q4	1.8	6	0	1	2	63	1.1	36	21	20
Germany	2013 Q1	1.5	6	0	1	1.8	62	0.9	33.6	21	20
Germany	2013 Q2	1.2	5	0	1	1.7	61	0.7	31.3	21	20
Germany	2013 Q3	1	5	0	1	1.7	60	0.6	29.4	21	20
Germany	2013 Q4	0.9	5	0	1	1.6	59	0.5	28	21	20
Germany	2014 Q1	0.8	5	0	1	1.6	58	0.5	27.2	21	20
Germany	2014 Q2	0.6	4	0	1	1.6	58	0.3	27	21	20
Germany	2014 Q3	0.7	5	0	1	1.8	59	0.4	27.6	21	20
Germany	2014 Q4	0.9	5	0	1	2	60	0.5	28.9	21	20
Germany	2015 Q1	1	5	0	1	1.9	60	0.6	30.7	21	20
Germany	2015 Q2	0.8	5	0	1	1.8	59	0.5	32.9	21	20
Germany	2015 Q3	0.6	4	0	1	1.7	59	0.4	35.3	21	20
Germany	2015 Q4	0.4	4	0	1	1.5	58	0.2	37.6	21	20
Germany	2016 Q1	0.2	4	0	1	1.5	58	0.1	39.7	21	20
Germany	2016 Q2	-0.1	4	0	1	1.5	58	-0.1	41.4	21	20
Germany	2016 Q3	-0.1	4	0	1	1.8	59	-0.1	42.5	21	20
Germany	2016 Q4	0	4	0	1	2	60	0	43	21	20
Germany	2017 Q1	0.1	4	0	1	1.5	59	0.1	42.7	21	20
Germany	2017 Q2	0.3	5	0	1	1.2	58	0.2	41.8	21	20
Germany	2017 Q3	0.5	5	0	1.5	-4.3	69	0.3	40.2	21	20
Germany	2017 Q4	0.7	5	0	1.3	-3.7	68	0.5	38.2	21	20
Germany	2018 Q1	0.8	6	0	1	-2.6	65	0.5	35.9	21	20
Germany	2018 Q2	0.8	6	0	1	-2.2	63	0.5	33.5	21	20
Germany	2018 Q3	-0.5	10	0	1.5	-4	64	-0.3	31.2	21	20
Germany	2018 Q4	-0.4	10	0	1.3	-3.5	63	-0.3	29.3	21	20
Germany	2019 Q1	-0.2	9	0	1.1	-3	62	-0.1	27.9	21	20
Germany	2019 Q2	0.1	8	0	1	-2.5	60	0.1	27.1	21	20
Germany	2019 Q3	0.3	7	0	1	-2	59	0.2	27.1	21	20
Germany	2019 Q4	0.4	7	0	1	-1.8	57	0.2	27.7	21	20
Germany	2020 Q1	0.5	8	0	1	-1.5	55	0.3	29	21	20
Germany	2020 Q2	0.7	8	0	1	-1.2	54	0.4	30.8	21	20
Germany	2020 Q3	1	9	0	1	-1	52	0.5	33	21	20
Germany	2020 Q4	1.6	10	0	1	-1.5	52	0.8	35.4	21	20
Germany	2021 Q1	2.4	12	0	1	-2	53	1.3	37.7	21	20
Germany	2021 Q2	2.8	14	0	1.1	-2.5	55	1.5	39.8	21	20
Germany	2021 Q3	2.6	13	0	1.1	-2.8	56	1.5	41.5	21	20
Germany	2021 Q4	2.4	12	0	1.2	-3	57	1.4	42.6	21	20
Germany	2022 Q1	2.2	11	0	1.2	-3	58	1.3	43	21	20
Germany	2022 Q2	2.4	12	0	1.1	-2.8	57	1.4	42.7	21	20
Germany	2022 Q3	2.6	13	0	1.1	-2.5	56	1.5	41.7	21	20
Germany	2022 Q4	2.8	14	0	1	-2.2	55	1.5	40.1	21	20
Germany	2023 Q1	3	15	0	1	-2	55	1.6	38.1	21	20
Germany	2023 Q2	3.1	15	0	1	-1.8	56	1.7	35.7	21	20
Germany	2023 Q3	2.8	13	0	1	-1.5	57	1.6	33.3	21	20
Germany	2023 Q4	2.6	12	0	1	-1.2	57	1.5	31.1	21	20
Germany	2024 Q1	2.4	11	0	1	-1	56	1.3	29.2	21	20
Germany	2024 Q2	2.2	10	0	1	-0.8	55	1.2	27.8	21	20
Germany	2024 Q3	2	10	0	1	-0.6	54	1.1	27.1	21	20
Germany	2024 Q4	1.9	10	0	1	-0.5	53	1	27.1	21	20
Germany	2025 Q1	2	11	0	1	-0.4	53	1.1	27.8	21	20
Germany	2025 Q2	2.2	12	0	1	-0.3	54	1.2	29.1	21	20
Germany	2025 Q3	2.4	13	0	1	-0.2	55	1.3	30.9	21	20
Germany	2025 Q4	2.6	14	0	1	-0.1	56	1.5	33.2	21	20
France	2005 Q1	3.2	30	-20	1.7	-3.5	92	2.9	33	19	18
France	2005 Q2	3.29	30	-31	1.5	-3	92	3	35.4	19	18
France	2005 Q3	2.98	31	-102	1.4	-2.7	95	2.8	37.5	19	18
France	2005 Q4	3.2	30	-70	1.6	-3.4	91	2.9	39.3	19	18
France	2006 Q1	3.49	26	-31	1.5	-3.3	89	3.1	40.5	19	18
France	2006 Q2	2.9	23	-70	1.7	-4.1	90	2.6	41	19	18
France	2006 Q3	2.51	18	-139	1.2	-2.8	91	2.3	40.8	19	18
France	2006 Q4	2.55	19	-165	1.5	-3.6	92	2.3	39.9	19	18
France	2007 Q1	2.45	25	-175	1.6	-3.6	92	2.3	38.4	19	18
France	2007 Q2	2.45	23	-155	1.9	-4.5	94	2.3	36.4	19	18
France	2007 Q3	2.19	20	-111	1.3	-3	93	2	34.1	19	18
France	2007 Q4	2.46	22	-74	1.7	-4	90	2.2	31.7	19	18
France	2008 Q1	2.69	24	-1	1.5	-3.4	90	2.4	29.5	19	18
France	2008 Q2	2.71	25	31	1.5	-3.3	90	2.4	27.5	19	18
France	2008 Q3	3.05	20	125	1.4	-3.1	90	2.7	26	19	18
France	2008 Q4	3.19	20	199	1.5	-3.6	93	3	25.2	19	18
France	2009 Q1	2.93	23	203	2	-4.9	93	2.7	25	19	18
France	2009 Q2	3.04	17	214	1.5	-3.6	93	2.8	25.6	19	18
France	2009 Q3	2.75	14	145	1.6	-4	92	2.5	26.8	19	18
France	2009 Q4	3.02	5	102	1.1	-3	93	2.8	28.6	19	18
France	2010 Q1	3	5	120	1.6	-4.7	93	2.8	30.8	19	18
France	2010 Q2	2.95	5	125	1.6	-4.7	91	2.7	33.1	19	18
France	2010 Q3	2.74	5	124	1.6	-4.7	90	2.5	35.5	19	18
France	2010 Q4	3.11	5	181	1.1	-3	92	2.9	37.6	19	18
France	2011 Q1	3.06	6	186	1.2	-3.2	91	2.8	39.3	19	18
France	2011 Q2	2.93	7	153	1.4	-3.9	91	2.7	40.5	19	18
France	2011 Q3	2.83	6	123	1.3	-3.6	91	2.6	41	19	18
France	2011 Q4	2.99	5	119	1.2	-3.4	92	2.8	40.8	19	18
France	2012 Q1	3.1	5	110	1.6	-4.5	93	2.9	39.8	19	18
France	2012 Q2	3.22	5	102	1.1	-2.9	89	2.9	38.3	19	18
France	2012 Q3	3.35	6	95	1	-2.6	95	3.2	36.3	19	18
France	2012 Q4	3.99	5	219	1.4	-3.9	92	3.7	34	19	18
France	2013 Q1	3.87	5	237	1.4	-3.9	92	3.6	31.6	19	18
France	2013 Q2	3.72	5	252	1.2	-3.4	90	3.3	29.3	19	18
France	2013 Q3	3.47	5	247	1.3	-3.7	88	3.1	27.4	19	18
France	2013 Q4	3.66	10	276	1.3	-3.5	90	3.3	26	19	18
France	2014 Q1	4	6	320	1.3	-3.7	92	3.7	25.2	19	18
France	2014 Q2	3.96	6	336	1.5	-4.3	94	3.7	25	19	18
France	2014 Q3	3.71	11	301	1.4	-3.8	92	3.4	25.6	19	18
France	2014 Q4	3.46	8	256	1.4	-3.9	92	3.2	26.9	19	18
France	2015 Q1	3.66	7	266	1.6	-4.3	92	3.4	28.7	19	18
France	2015 Q2	3.88	8	308	1.6	-4.5	93	3.6	30.9	19	18
France	2015 Q3	4.05	8	345	1.4	-3.7	90	3.6	33.3	19	18
France	2015 Q4	3.85	5	345	1.4	-4	92	3.5	35.6	19	18
France	2016 Q1	3.92	5	372	1.3	-3.8	92	3.6	37.7	19	18
France	2016 Q2	3.95	12	405	1.6	-4.2	97	3.8	39.4	19	18
France	2016 Q3	4.02	5	412	1.7	-4.9	91	3.7	40.5	19	18
France	2016 Q4	4.28	9	428	1.3	-3.5	93	4	41	19	18
France	2017 Q1	4.34	10	424	1.4	-3.8	94	4.1	40.7	19	18
France	2017 Q2	4.55	7	425	1.1	-2.9	94	4.3	39.8	19	18
France	2017 Q3	4.57	17	407	1.8	-4.5	91	4.2	38.2	19	18
France	2017 Q4	4.65	20	395	1.5	-3.6	90	4.2	36.2	19	18
France	2018 Q1	4.84	15	404	1.8	-4.6	92	4.5	33.9	19	18
France	2018 Q2	4.41	15	361	1.7	-4.2	93	4.1	31.5	19	18
France	2018 Q3	4.31	18	481	1.9	-4.7	91	3.9	29.2	19	18
France	2018 Q4	4.17	17	457	1.3	-3	92	3.8	27.3	19	18
France	2019 Q1	3.98	20	418	1.7	-4.2	90	3.6	25.9	19	18
France	2019 Q2	3.9	20	380	1.9	-4.7	88	3.4	25.1	19	18
France	2019 Q3	4.34	23	404	1.6	-3.5	95	4.1	25.1	19	18
France	2019 Q4	4.08	30	368	1.9	-4.1	94	3.8	25.7	19	18
France	2020 Q1	4.38	27	388	1.9	-4.3	94	4.1	27	19	18
France	2020 Q2	3.87	28	317	1.7	-3.8	92	3.6	28.8	19	18
France	2020 Q3	3.77	26	277	1.5	-3.3	91	3.4	31	19	18
France	2020 Q4	3.82	26	222	1.8	-4.1	92	3.5	33.4	19	18
France	2021 Q1	3.99	20	159	1.7	-4.1	92	3.7	35.7	19	18
France	2021 Q2	4.21	18	141	2	-5.1	91	3.8	37.8	19	18
France	2021 Q3	4.45	17	185	1.4	-3.4	94	4.2	39.5	19	18
France	2021 Q4	4.34	21	194	1.4	-3.2	90	3.9	40.6	19	18
France	2022 Q1	4.2	27	200	1.8	-4	92	3.9	41	19	18
France	2022 Q2	4.46	20	206	1.5	-3.4	93	4.1	40.7	19	18
France	2022 Q3	4.4	16	180	1.4	-3.3	95	4.2	39.7	19	18
France	2022 Q4	4.02	19	122	1.6	-3.7	91	3.7	38.1	19	18
France	2023 Q1	3.68	9	68	1.4	-3.8	91	3.3	36.1	19	18
France	2023 Q2	3.4	7	30	1.4	-3.7	93	3.2	33.7	19	18
France	2023 Q3	3.55	7	75	1.4	-3.8	91	3.2	31.3	19	18
France	2023 Q4	3.6	13	100	1.4	-3.4	89	3.2	29.1	19	18
France	2024 Q1	3.8	16	140	1.2	-2.7	92	3.5	27.2	19	18
France	2024 Q2	3.67	15	147	1.7	-4.4	92	3.4	25.8	19	18
France	2024 Q3	3.72	13	172	1.6	-4.2	92	3.4	25.1	19	18
France	2024 Q4	3.91	12	201	1.4	-3.6	90	3.5	25.1	19	18
France	2025 Q1	3.82	19	182	1.4	-3.1	92	3.5	25.8	19	18
France	2025 Q2	3.95	17	175	1.6	-3.9	91	3.6	27.1	19	18
France	2025 Q3	3.76	16	136	1.5	-3.8	91	3.4	28.9	19	18
France	2025 Q4	3.65	17	105	1.6	-4.1	93	3.4	31.2	19	18
Italy	2005 Q1	3.6	20	20	1.8	-4.5	105	3.8	33	14	13
Italy	2005 Q2	3.8	22	20	1.8	-4.4	106	4	35.4	14	13
Italy	2005 Q3	4.3	30	30	1.6	-3.4	106	4.6	37.5	14	13
Italy	2005 Q4	4.3	28	40	1	-1.5	106	4.6	39.3	14	13
Italy	2006 Q1	4.2	26	40	1	-1.5	106	4.5	40.5	14	13
Italy	2006 Q2	4	24	40	1.9	-4.4	106	4.2	41	14	13
Italy	2006 Q3	4.4	28	50	1.6	-3.4	103	4.5	40.8	14	13
Italy	2006 Q4	4.7	35	50	1.5	-2.7	103	4.8	39.9	14	13
Italy	2007 Q1	4.7	38	50	1.5	-2.7	105	4.9	38.4	14	13
Italy	2007 Q2	4.5	120	50	3.8	-5.4	115	5.2	36.4	13	12
Italy	2007 Q3	4	205	70	4.8	-4.2	119	4.8	34.1	13	12
Italy	2007 Q4	4	280	80	5.9	-3.7	120	4.8	31.7	12	11
Italy	2008 Q1	4.1	320	140	6.3	-3	123	5	29.5	12	11
Italy	2008 Q2	4.4	450	200	8.5	-2.9	128	5.6	27.5	12	11
Italy	2008 Q3	4.2	380	240	7.3	-3	132	5.5	26	12	11
Italy	2008 Q4	3.8	280	260	5.5	-2.6	135	5.1	25.2	12	11
Italy	2009 Q1	3.7	220	280	4.5	-2.4	134	5	25	12	11
Italy	2009 Q2	3.6	180	270	3.8	-2.4	132	4.8	25.6	12	11
Italy	2009 Q3	4.3	195	300	4	-2.2	132	5.7	26.8	12	11
Italy	2009 Q4	6	380	400	6.9	-1.6	130	7.8	28.6	11	10
Italy	2010 Q1	7.3	550	550	10	-3.5	129	9.4	30.8	11	10
Italy	2010 Q2	7.1	520	540	9.7	-3.1	128	9.1	33.1	11	10
Italy	2010 Q3	6.8	490	530	9.2	-3	130	8.8	35.5	11	10
Italy	2010 Q4	6.5	460	520	8.6	-2.8	132	8.6	37.6	11	10
Italy	2011 Q1	4.8	270	360	5.3	-2.5	130	6.2	39.3	12	11
Italy	2011 Q2	4.5	260	310	5.3	-2.9	132	5.9	40.5	12	11
Italy	2011 Q3	4.2	250	260	5.2	-3	134	5.6	41	12	11
Italy	2011 Q4	4	240	220	4.9	-2.7	132	5.3	40.8	12	11
Italy	2012 Q1	4.4	260	240	5.2	-2.6	131	5.8	39.8	12	11
Italy	2012 Q2	4.6	280	240	5.5	-2.5	132	6.1	38.3	12	11
Italy	2012 Q3	4.8	300	240	5.8	-2.4	135	6.5	36.3	12	11
Italy	2012 Q4	3.6	190	180	4.1	-2.8	133	4.8	34	12	11
Italy	2013 Q1	3.4	170	190	3.8	-3	132	4.5	31.6	12	11
Italy	2013 Q2	3	150	180	3.4	-2.8	131	3.9	29.3	12	11
Italy	2013 Q3	2.6	130	160	3.1	-2.7	129	3.4	27.4	12	11
Italy	2013 Q4	2.2	110	130	2.7	-2.5	128	2.8	26	12	11
Italy	2014 Q1	2	100	120	2.5	-2.4	127	2.5	25.2	12	11
Italy	2014 Q2	1.9	95	130	2.3	-2.3	128	2.4	25	12	11
Italy	2014 Q3	2.2	110	150	2.6	-2.2	130	2.9	25.6	12	11
Italy	2014 Q4	2.7	130	180	3	-2.4	132	3.6	26.9	12	11
Italy	2015 Q1	2.9	145	190	3.2	-2.5	134	3.9	28.7	12	11
Italy	2015 Q2	2.8	140	200	3.1	-2.4	133	3.7	30.9	12	11
Italy	2015 Q3	2.7	135	210	3	-2.3	132	3.6	33.3	12	11
Italy	2015 Q4	2.6	130	220	2.9	-2.2	131	3.4	35.6	12	11
Italy	2016 Q1	2.3	120	210	2.7	-2	130	3	37.7	12	11
Italy	2016 Q2	2	110	210	2.5	-1.9	129	2.6	39.4	12	11
Italy	2016 Q3	1.8	100	190	2.3	-1.8	128	2.3	40.5	12	11
Italy	2016 Q4	2	110	200	2.5	-2	130	2.6	41	12	11
Italy	2017 Q1	2.2	120	210	2.7	-2.2	132	2.9	40.7	12	11
Italy	2017 Q2	2.5	135	220	3.1	-2.5	135	3.4	39.8	12	11
Italy	2017 Q3	2.8	150	230	5.7	-9.7	157	4.4	38.2	11	10
Italy	2017 Q4	3.2	170	250	5.8	-8.9	159	5.1	36.2	11	10
Italy	2018 Q1	3.5	190	270	5.8	-8	155	5.4	33.9	11	10
Italy	2018 Q2	3.3	180	250	5.5	-7.5	150	5	31.5	11	10
Italy	2018 Q3	0.9	110	140	4.5	-8	155	1.4	29.2	11	10
Italy	2018 Q4	0.8	100	120	4.2	-7.5	153	1.2	27.3	11	10
Italy	2019 Q1	1	110	120	4.2	-7	150	1.5	25.9	11	10
Italy	2019 Q2	1.5	140	140	4.5	-6.5	148	2.2	25.1	11	10
Italy	2019 Q3	2	170	170	4.8	-6	145	2.9	25.1	12	11
Italy	2019 Q4	2.2	185	180	4.9	-5.5	142	3.1	25.7	12	11
Italy	2020 Q1	2.5	200	200	5	-5	140	3.5	27	12	11
Italy	2020 Q2	2.8	220	210	5.2	-4.5	138	3.9	28.8	12	11
Italy	2020 Q3	3.5	270	250	5.8	-4	135	4.7	31	12	11
Italy	2020 Q4	4.4	320	280	6.8	-4.5	138	6.1	33.4	12	11
Italy	2021 Q1	5	360	260	7.7	-5	142	7.1	35.7	12	11
Italy	2021 Q2	5.2	375	240	8.1	-5.5	146	7.6	37.8	11	10
Italy	2021 Q3	4.8	350	220	7.8	-6	149	7.2	39.5	11	10
Italy	2021 Q4	4.6	330	220	7.7	-6.5	151	6.9	40.6	11	10
Italy	2022 Q1	4.3	310	210	7.5	-7	153	6.6	41	11	10
Italy	2022 Q2	4.6	330	220	7.7	-6.5	150	6.9	40.7	11	10
Italy	2022 Q3	5	360	240	8	-6	148	7.4	39.7	11	10
Italy	2022 Q4	5.4	390	260	8.3	-5.5	145	7.8	38.1	11	10
Italy	2023 Q1	5.8	420	280	8.7	-5	143	8.3	36.1	11	10
Italy	2023 Q2	6	435	290	8.8	-4.8	141	8.5	33.7	11	10
Italy	2023 Q3	5.5	400	270	8.2	-4.5	139	7.6	31.3	11	10
Italy	2023 Q4	5	370	240	7.6	-4.2	137	6.8	29.1	11	10
Italy	2024 Q1	4.8	350	240	7.2	-4	135	6.5	27.2	11	10
Italy	2024 Q2	4.6	330	240	6.8	-3.8	133	6.1	25.8	12	11
Italy	2024 Q3	4.4	310	240	6.4	-3.6	131	5.8	25.1	12	11
Italy	2024 Q4	4.2	295	230	6.1	-3.4	130	5.5	25.1	12	11
Italy	2025 Q1	4	285	200	5.8	-3.2	129	5.2	25.8	12	11
Italy	2025 Q2	3.9	275	170	5.6	-3	128	5	27.1	12	11
Italy	2025 Q3	3.8	265	140	5.4	-2.8	127	4.8	28.9	12	11
Italy	2025 Q4	3.7	255	110	5.1	-2.6	126	4.7	31.2	12	11
Spain	2005 Q1	3.8	80	40	2.6	-3.9	94	3.6	38	13	12
Spain	2005 Q2	3.94	80	34	2.7	-4.2	95	3.7	40.4	13	12
Spain	2005 Q3	3.47	84	-53	3	-4.9	95	3.3	42.5	13	12
Spain	2005 Q4	3.81	80	-9	2.9	-4.6	96	3.7	44.3	13	12
Spain	2006 Q1	4.23	70	43	3	-5.5	95	4	45.5	13	12
Spain	2006 Q2	3.35	64	-25	2.5	-4.4	96	3.2	46	13	12
Spain	2006 Q3	2.77	52	-113	2.5	-5	93	2.6	45.8	13	12
Spain	2006 Q4	2.82	53	-138	2	-3.4	95	2.7	44.9	13	12
Spain	2007 Q1	2.68	69	-152	2.6	-4.4	95	2.5	43.4	13	12
Spain	2007 Q2	2.67	63	-133	2.7	-4.9	93	2.5	41.4	13	12
Spain	2007 Q3	2.29	56	-101	2.4	-4.4	93	2.1	39.1	13	12
Spain	2007 Q4	2.69	62	-51	2.4	-4.2	96	2.6	36.7	13	12
Spain	2008 Q1	3.04	66	34	2.8	-5	96	2.9	34.5	13	12
Spain	2008 Q2	3.07	67	67	2.8	-5.1	95	2.9	32.5	13	12
Spain	2008 Q3	3.57	56	177	2.3	-4.2	93	3.3	31	13	12
Spain	2008 Q4	3.78	56	258	1.9	-3	95	3.6	30.2	13	12
Spain	2009 Q1	3.4	64	250	2.6	-4.5	97	3.3	30	13	12
Spain	2009 Q2	3.56	48	266	2.3	-4.4	95	3.4	30.6	13	12
Spain	2009 Q3	3.13	42	183	2.1	-4.1	93	2.9	31.8	13	12
Spain	2009 Q4	3.53	20	153	1.8	-4.3	94	3.3	33.6	13	12
Spain	2010 Q1	3.5	5	170	1.7	-4.8	96	3.4	35.8	13	12
Spain	2010 Q2	3.42	5	172	1.5	-4.2	95	3.2	38.1	13	12
Spain	2010 Q3	3.11	5	161	1.7	-4.8	93	2.9	40.5	13	12
Spain	2010 Q4	3.66	5	236	1.6	-4.6	93	3.4	42.6	13	12
Spain	2011 Q1	3.59	8	239	1.7	-4.6	96	3.4	44.3	13	12
Spain	2011 Q2	3.4	10	200	1.7	-4.7	95	3.2	45.5	13	12
Spain	2011 Q3	3.24	8	164	1.5	-4.1	97	3.1	46	13	12
Spain	2011 Q4	3.48	5	168	1.6	-4.5	95	3.3	45.8	13	12
Spain	2012 Q1	3.65	5	165	1.5	-4.2	94	3.4	44.8	13	12
Spain	2012 Q2	3.83	5	163	1.5	-4.2	96	3.7	43.3	13	12
Spain	2012 Q3	4.03	6	163	1.6	-4.4	96	3.9	41.3	13	12
Spain	2012 Q4	4.99	5	319	1.7	-4.8	96	4.8	39	13	12
Spain	2013 Q1	4.81	5	331	1.2	-3.3	95	4.6	36.6	13	12
Spain	2013 Q2	4.58	5	338	1.3	-3.8	95	4.4	34.3	13	12
Spain	2013 Q3	4.21	5	321	1.6	-4.5	91	3.8	32.4	13	12
Spain	2013 Q4	4.49	18	359	2.3	-5.9	93	4.2	31	13	12
Spain	2014 Q1	5	8	420	1.5	-4.2	94	4.7	30.2	13	12
Spain	2014 Q2	4.95	8	435	1.4	-3.9	94	4.7	30	13	12
Spain	2014 Q3	4.57	18	387	2.1	-5.3	95	4.3	30.6	13	12
Spain	2014 Q4	4.2	11	330	1.5	-4	94	3.9	31.9	13	12
Spain	2015 Q1	4.49	10	349	1.5	-3.9	97	4.4	33.7	13	12
Spain	2015 Q2	4.82	11	402	2	-5.5	94	4.5	35.9	13	12
Spain	2015 Q3	5.07	12	447	1.7	-4.4	96	4.9	38.3	13	12
Spain	2015 Q4	4.77	5	437	1.6	-4.4	95	4.5	40.6	13	12
Spain	2016 Q1	4.87	6	467	1.8	-5.2	97	4.7	42.7	13	12
Spain	2016 Q2	4.93	22	503	1.6	-3.6	95	4.7	44.4	13	12
Spain	2016 Q3	5.02	5	512	1.7	-4.9	96	4.8	45.5	13	12
Spain	2016 Q4	5.42	15	542	1.7	-4.3	96	5.2	46	13	12
Spain	2017 Q1	5.52	17	542	1.9	-4.7	94	5.2	45.7	13	12
Spain	2017 Q2	5.82	9	552	1.3	-3.6	94	5.5	44.8	13	12
Spain	2017 Q3	5.85	33	535	2.2	-5.1	95	5.6	43.2	13	12
Spain	2017 Q4	5.98	42	528	2	-4	94	5.6	41.2	13	12
Spain	2018 Q1	6.27	28	547	2	-4.5	96	6	38.9	13	12
Spain	2018 Q2	5.61	29	481	2.1	-4.8	96	5.4	36.5	13	12
Spain	2018 Q3	5.47	36	597	2.2	-4.7	96	5.3	34.2	13	12
Spain	2018 Q4	5.26	33	566	2	-4.4	95	5	32.3	13	12
Spain	2019 Q1	4.97	42	517	2.3	-4.9	94	4.7	30.9	13	12
Spain	2019 Q2	4.84	41	474	2.3	-4.8	96	4.6	30.1	13	12
Spain	2019 Q3	5.52	49	522	2.5	-4.9	95	5.2	30.1	13	12
Spain	2019 Q4	5.13	66	473	2.5	-4.1	93	4.8	30.7	13	12
Spain	2020 Q1	5.56	58	506	2.5	-4.5	94	5.2	32	13	12
Spain	2020 Q2	4.81	60	411	2.9	-5.6	96	4.6	33.8	13	12
Spain	2020 Q3	4.65	55	365	2.6	-5	95	4.4	36	13	12
Spain	2020 Q4	4.73	56	313	2.6	-5	95	4.5	38.4	13	12
Spain	2021 Q1	4.99	42	259	2.1	-4.3	96	4.8	40.7	13	12
Spain	2021 Q2	5.31	35	251	1.9	-3.9	98	5.2	42.8	13	12
Spain	2021 Q3	5.67	33	307	2	-4.3	92	5.2	44.5	13	12
Spain	2021 Q4	5.51	44	311	2.3	-4.7	95	5.2	45.6	13	12
Spain	2022 Q1	5.3	57	310	2.6	-5	95	5	46	13	12
Spain	2022 Q2	5.69	41	329	2.1	-4.2	97	5.5	45.7	13	12
Spain	2022 Q3	5.6	32	300	2.2	-4.9	94	5.3	44.7	13	12
Spain	2022 Q4	5.03	40	223	1.8	-3.5	96	4.8	43.1	13	12
Spain	2023 Q1	4.52	16	152	1.5	-3.7	95	4.3	41.1	13	12
Spain	2023 Q2	4.11	10	101	1.5	-4	95	3.9	38.7	13	12
Spain	2023 Q3	4.33	9	153	1.8	-4.9	94	4.1	36.3	13	12
Spain	2023 Q4	4.39	24	179	1.6	-3.6	95	4.2	34.1	13	12
Spain	2024 Q1	4.7	32	230	2	-4.5	97	4.6	32.2	13	12
Spain	2024 Q2	4.51	28	231	1.8	-4	99	4.5	30.8	13	12
Spain	2024 Q3	4.58	24	258	1.7	-4	98	4.5	30.1	13	12
Spain	2024 Q4	4.87	21	297	2.1	-5.2	94	4.6	30.1	13	12
Spain	2025 Q1	4.73	39	273	2.1	-4.5	92	4.4	30.8	13	12
Spain	2025 Q2	4.93	34	273	1.9	-4.1	92	4.5	32.1	13	12
Spain	2025 Q3	4.63	31	223	2.1	-4.8	96	4.4	33.9	13	12
Spain	2025 Q4	4.47	35	187	2.4	-5.5	95	4.2	36.2	13	12
Greece	2005 Q1	8.5	350	510	8.2	-7.2	169	14.4	30	9	8
Greece	2005 Q2	8.87	350	527	8	-6.5	166	14.7	32.4	9	8
Greece	2005 Q3	7.62	362	362	8.5	-7.3	168	12.8	34.5	9	8
Greece	2005 Q4	8.52	351	462	8.2	-7.1	168	14.3	36.3	9	8
Greece	2006 Q1	9.65	315	585	7.2	-6	169	16.3	37.5	9	8
Greece	2006 Q2	7.31	297	371	7.5	-7.5	170	12.4	38	9	8
Greece	2006 Q3	5.74	258	184	6.5	-6.6	171	9.8	37.8	9	8
Greece	2006 Q4	5.9	260	170	6.9	-7.6	167	9.9	36.9	9	8
Greece	2007 Q1	5.52	314	132	7.4	-6.6	168	9.3	35.4	9	8
Greece	2007 Q2	5.5	294	150	7.5	-7.8	170	9.3	33.4	9	8
Greece	2007 Q3	4.47	269	117	6.8	-7.1	169	7.6	31.1	9	8
Greece	2007 Q4	5.53	289	233	6.9	-6.2	167	9.2	28.7	9	8
Greece	2008 Q1	6.46	303	376	7.4	-7.1	167	10.8	26.5	9	8
Greece	2008 Q2	6.54	307	414	7.4	-6.9	168	11	24.5	9	8
Greece	2008 Q3	7.89	270	609	6.9	-7.2	170	13.4	23	9	8
Greece	2008 Q4	8.45	269	725	7.1	-7.8	167	14.1	22.2	9	8
Greece	2009 Q1	7.42	297	652	7.1	-6.4	168	12.5	22	9	8
Greece	2009 Q2	7.87	243	697	6.6	-7.7	169	13.3	22.6	9	8
Greece	2009 Q3	6.72	225	542	6.4	-7.9	166	11.2	23.8	9	8
Greece	2009 Q4	7.77	148	577	4.8	-6.9	167	13	25.6	9	8
Greece	2010 Q1	7.71	97	591	4	-7	169	13	27.8	9	8
Greece	2010 Q2	7.49	23	579	2.7	-7	165	12.4	30.1	9	8
Greece	2010 Q3	6.67	14	517	2.6	-7.2	167	11.1	32.5	9	8
Greece	2010 Q4	8.14	5	684	2.5	-7.2	168	13.7	34.6	9	8
Greece	2011 Q1	7.95	16	675	2.9	-7.8	168	13.4	36.3	9	8
Greece	2011 Q2	7.44	22	604	2.7	-7.1	166	12.4	37.5	9	8
Greece	2011 Q3	7.02	15	542	2.4	-6.3	170	11.9	38	9	8
Greece	2011 Q4	7.65	5	585	2.2	-6.3	166	12.7	37.8	9	8
Greece	2012 Q1	8.09	5	609	2.7	-7.7	169	13.7	36.8	9	8
Greece	2012 Q2	8.59	5	639	2.5	-7.3	168	14.4	35.3	9	8
Greece	2012 Q3	9.11	10	671	2.8	-7.9	167	15.2	33.3	9	8
Greece	2012 Q4	11.68	5	988	2.5	-7.1	167	19.5	31	9	8
Greece	2013 Q1	11.19	5	969	2.6	-7.6	168	18.8	28.6	9	8
Greece	2013 Q2	10.57	5	937	2.4	-6.9	169	17.9	26.3	9	8
Greece	2013 Q3	9.6	5	860	2.2	-6.5	168	16.1	24.4	9	8
Greece	2013 Q4	10.34	47	944	2.9	-6.4	168	17.4	23	9	8
Greece	2014 Q1	11.69	15	1089	2.7	-7.3	167	19.5	22.2	9	8
Greece	2014 Q2	11.55	14	1095	2.6	-7.1	168	19.4	22	9	8
Greece	2014 Q3	10.55	49	985	3.2	-7.2	165	17.4	22.6	9	8
Greece	2014 Q4	9.56	26	866	2.5	-6.1	168	16.1	23.9	9	8
Greece	2015 Q1	10.34	21	934	2.4	-6.1	170	17.6	25.7	9	8
Greece	2015 Q2	11.23	26	1043	2.9	-7.3	167	18.8	27.9	9	8
Greece	2015 Q3	11.88	28	1128	2.6	-6.3	167	19.8	30.3	9	8
Greece	2015 Q4	11.08	5	1068	2.2	-6.5	163	18.1	32.6	9	8
Greece	2016 Q1	11.36	8	1116	2.3	-6.6	168	19.1	34.7	9	8
Greece	2016 Q2	11.5	62	1160	3.6	-7.8	166	19.1	36.4	9	8
Greece	2016 Q3	11.76	5	1186	2.2	-6.5	169	19.9	37.5	9	8
Greece	2016 Q4	12.81	39	1281	2.8	-6.5	167	21.4	38	9	8
Greece	2017 Q1	13.08	44	1298	2.9	-6.5	168	22	37.7	9	8
Greece	2017 Q2	13.89	18	1359	2.6	-7	169	23.5	36.8	9	8
Greece	2017 Q3	13.97	99	1347	4.2	-7.6	167	23.3	35.2	9	8
Greece	2017 Q4	14.32	129	1362	4.5	-7.2	168	24.1	33.2	9	8
Greece	2018 Q1	15.08	81	1428	3.8	-7.4	170	25.6	30.9	9	8
Greece	2018 Q2	13.33	84	1253	3.9	-7.5	167	22.3	28.5	9	8
Greece	2018 Q3	12.94	107	1344	4.3	-7.6	170	22	26.2	9	8
Greece	2018 Q4	12.38	100	1278	4.2	-7.5	171	21.2	24.3	9	8
Greece	2019 Q1	11.61	127	1181	4.2	-6.2	166	19.3	22.9	9	8
Greece	2019 Q2	11.28	124	1118	4.3	-6.7	165	18.6	22.1	9	8
Greece	2019 Q3	13.08	151	1278	4.8	-6.9	170	22.2	22.1	9	8
Greece	2019 Q4	12.04	208	1164	5.7	-6.7	169	20.3	22.7	9	8
Greece	2020 Q1	13.2	181	1270	5.2	-6.7	168	22.2	24	9	8
Greece	2020 Q2	11.18	190	1048	5.7	-7.5	168	18.8	25.8	9	8
Greece	2020 Q3	10.78	171	978	5	-6.6	169	18.2	28	9	8
Greece	2020 Q4	10.97	176	937	4.9	-5.8	165	18.1	30.4	9	8
Greece	2021 Q1	11.68	129	928	4.6	-7.3	167	19.5	32.7	9	8
Greece	2021 Q2	12.53	105	973	4.1	-7	169	21.2	34.8	9	8
Greece	2021 Q3	13.48	98	1088	3.9	-6.7	168	22.6	36.5	9	8
Greece	2021 Q4	13.07	134	1067	4.5	-6.9	169	22.1	37.6	9	8
Greece	2022 Q1	12.51	179	1031	5.5	-7.5	169	21.1	38	9	8
Greece	2022 Q2	13.54	126	1114	4.5	-7.2	166	22.5	37.7	9	8
Greece	2022 Q3	13.31	95	1071	4.2	-7.8	168	22.4	36.7	9	8
Greece	2022 Q4	11.78	120	898	4.5	-7.4	167	19.7	35.1	9	8
Greece	2023 Q1	10.42	41	742	2.9	-6.7	167	17.4	33.1	9	8
Greece	2023 Q2	9.32	22	622	2.5	-6.5	166	15.5	30.7	9	8
Greece	2023 Q3	9.91	18	711	2.6	-6.9	171	16.9	28.3	9	8
Greece	2023 Q4	10.08	69	748	3.5	-6.9	167	16.8	26.1	9	8
Greece	2024 Q1	10.91	96	851	3.9	-7	168	18.3	24.2	9	8
Greece	2024 Q2	10.4	83	820	3.9	-7.4	169	17.6	22.8	9	8
Greece	2024 Q3	10.59	68	859	3.4	-6.8	169	17.9	22.1	9	8
Greece	2024 Q4	11.34	58	944	3.1	-6.5	169	19.2	22.1	9	8
Greece	2025 Q1	10.97	119	897	4.2	-6.5	167	18.3	22.8	9	8
Greece	2025 Q2	11.52	102	932	4	-6.9	166	19.1	24.1	9	8
Greece	2025 Q3	10.72	90	832	3.9	-7.1	166	17.8	25.9	9	8
Greece	2025 Q4	10.29	104	769	4.1	-7	170	17.5	28.2	9	8
Portugal	2005 Q1	4	100	60	3.3	-4.8	117	4.7	30	12	11
Portugal	2005 Q2	4.17	100	57	3.3	-4.9	117	4.9	32.4	12	11
Portugal	2005 Q3	3.6	104	-40	3	-3.8	117	4.2	34.5	12	11
Portugal	2005 Q4	4.01	100	11	3.1	-4.2	120	4.8	36.3	12	11
Portugal	2006 Q1	4.53	87	73	3.1	-4.9	118	5.3	37.5	12	11
Portugal	2006 Q2	3.45	80	-15	2.4	-3.2	118	4.1	38	12	11
Portugal	2006 Q3	2.74	65	-116	2.2	-3.4	117	3.2	37.8	12	11
Portugal	2006 Q4	2.81	66	-139	2.6	-4.6	117	3.3	36.9	12	11
Portugal	2007 Q1	2.63	86	-157	2.8	-4.1	119	3.1	35.4	12	11
Portugal	2007 Q2	2.62	79	-138	2.8	-4.3	116	3	33.4	12	11
Portugal	2007 Q3	2.15	70	-115	2.4	-3.8	115	2.5	31.1	12	11
Portugal	2007 Q4	2.64	77	-56	2.7	-4.2	118	3.1	28.7	12	11
Portugal	2008 Q1	3.07	82	37	2.8	-4.2	121	3.7	26.5	12	11
Portugal	2008 Q2	3.1	84	70	2.6	-3.6	117	3.6	24.5	12	11
Portugal	2008 Q3	3.72	70	192	2.5	-3.9	119	4.4	23	12	11
Portugal	2008 Q4	3.98	70	278	2.6	-4.3	119	4.7	22.2	12	11
Portugal	2009 Q1	3.51	80	261	2.9	-4.6	119	4.2	22	12	11
Portugal	2009 Q2	3.71	60	281	2.2	-3.5	121	4.5	22.6	12	11
Portugal	2009 Q3	3.18	53	188	2.1	-3.8	117	3.7	23.8	12	11
Portugal	2009 Q4	3.67	24	167	1.7	-4	118	4.3	25.6	12	11
Portugal	2010 Q1	3.64	5	184	1.2	-3.4	116	4.2	27.8	12	11
Portugal	2010 Q2	3.54	5	184	1.2	-3.3	116	4.1	30.1	12	11
Portugal	2010 Q3	3.16	5	166	1.6	-4.4	117	3.7	32.5	12	11
Portugal	2010 Q4	3.83	5	253	1.3	-3.6	118	4.5	34.6	12	11
Portugal	2011 Q1	3.75	9	255	1.6	-4.5	118	4.4	36.3	12	11
Portugal	2011 Q2	3.51	11	211	1.4	-3.6	118	4.1	37.5	12	11
Portugal	2011 Q3	3.32	9	172	1.6	-4.2	119	4	38	12	11
Portugal	2011 Q4	3.61	5	181	1.3	-3.6	117	4.2	37.8	12	11
Portugal	2012 Q1	3.81	5	181	1.3	-3.7	120	4.6	36.8	12	11
Portugal	2012 Q2	4.04	5	184	1.6	-4.4	119	4.8	35.3	12	11
Portugal	2012 Q3	4.28	7	188	1.5	-4.1	119	5.1	33.3	12	11
Portugal	2012 Q4	5.46	5	366	1.4	-3.9	118	6.4	31	12	11
Portugal	2013 Q1	5.23	5	373	1.3	-3.8	117	6.1	28.6	12	11
Portugal	2013 Q2	4.95	5	375	1.4	-3.9	120	5.9	26.3	12	11
Portugal	2013 Q3	4.5	5	350	1.6	-4.6	117	5.3	24.4	12	11
Portugal	2013 Q4	4.84	21	394	1.9	-4.8	120	5.8	23	12	11
Portugal	2014 Q1	5.46	9	466	1.4	-3.9	120	6.6	22.2	12	11
Portugal	2014 Q2	5.4	8	480	1.3	-3.5	117	6.3	22	12	11
Portugal	2014 Q3	4.94	22	424	1.6	-3.8	117	5.8	22.6	12	11
Portugal	2014 Q4	4.48	13	358	1.3	-3.2	117	5.2	23.9	12	11
Portugal	2015 Q1	4.84	11	384	1.5	-4	119	5.8	25.7	12	11
Portugal	2015 Q2	5.25	13	445	1.5	-3.8	117	6.1	27.9	12	11
Portugal	2015 Q3	5.55	14	495	1.8	-4.6	119	6.6	30.3	12	11
Portugal	2015 Q4	5.18	5	478	1.2	-3.5	118	6.1	32.6	12	11
Portugal	2016 Q1	5.31	6	511	1.6	-4.6	118	6.3	34.7	12	11
Portugal	2016 Q2	5.38	27	548	1.8	-4	117	6.3	36.4	12	11
Portugal	2016 Q3	5.5	5	560	1.2	-3.3	118	6.5	37.5	12	11
Portugal	2016 Q4	5.97	18	597	1.6	-4	117	7	38	12	11
Portugal	2017 Q1	6.1	20	600	1.2	-2.5	117	7.1	37.7	12	11
Portugal	2017 Q2	6.47	10	617	1.4	-3.8	117	7.6	36.8	12	11
Portugal	2017 Q3	6.51	40	601	2	-3.9	117	7.6	35.2	12	11
Portugal	2017 Q4	6.67	51	597	2.4	-4.7	120	8	33.2	12	11
Portugal	2018 Q1	7.01	34	621	1.9	-3.9	116	8.1	30.9	12	11
Portugal	2018 Q2	6.21	35	541	1.9	-4.1	118	7.3	28.5	12	11
Portugal	2018 Q3	6.04	43	654	2	-3.8	115	6.9	26.2	12	11
Portugal	2018 Q4	5.78	40	618	1.9	-3.8	118	6.8	24.3	12	11
Portugal	2019 Q1	5.43	51	563	2.4	-4.5	116	6.3	22.9	12	11
Portugal	2019 Q2	5.28	50	518	1.8	-3	120	6.3	22.1	12	11
Portugal	2019 Q3	6.1	60	580	2.4	-4.3	118	7.2	22.1	12	11
Portugal	2019 Q4	5.62	81	522	2.4	-3	119	6.7	22.7	12	11
Portugal	2020 Q1	6.15	71	565	2.6	-4.2	118	7.3	24	12	11
Portugal	2020 Q2	5.23	74	453	2.6	-4	119	6.2	25.8	12	11
Portugal	2020 Q3	5.04	67	404	2.4	-3.7	117	5.9	28	12	11
Portugal	2020 Q4	5.13	69	353	2.4	-3.8	119	6.1	30.4	12	11
Portugal	2021 Q1	5.46	51	306	2.2	-4	118	6.4	32.7	12	11
Portugal	2021 Q2	5.85	43	305	2.2	-4.5	116	6.8	34.8	12	11
Portugal	2021 Q3	6.28	40	368	1.9	-3.8	118	7.4	36.5	12	11
Portugal	2021 Q4	6.09	53	369	2	-3.3	117	7.1	37.6	12	11
Portugal	2022 Q1	5.84	70	364	2.1	-2.8	117	6.8	38	12	11
Portugal	2022 Q2	6.31	51	391	2.3	-4.4	118	7.4	37.7	12	11
Portugal	2022 Q3	6.2	39	360	1.8	-3.3	118	7.3	36.7	12	11
Portugal	2022 Q4	5.5	48	270	2.3	-4.6	117	6.4	35.1	12	11
Portugal	2023 Q1	4.88	18	188	1.7	-4.3	118	5.8	33.1	12	11
Portugal	2023 Q2	4.37	11	127	1.7	-4.5	113	4.9	30.7	12	11
Portugal	2023 Q3	4.65	10	185	1.4	-3.8	118	5.5	28.3	12	11
Portugal	2023 Q4	4.73	29	213	1.9	-4.2	119	5.6	26.1	12	11
Portugal	2024 Q1	5.11	39	271	2.2	-4.7	117	6	24.2	12	11
Portugal	2024 Q2	4.87	34	267	2.1	-4.6	118	5.7	22.8	12	11
Portugal	2024 Q3	4.96	29	296	1.8	-3.9	117	5.8	22.1	12	11
Portugal	2024 Q4	5.3	25	340	1.8	-4.1	119	6.3	22.1	12	11
Portugal	2025 Q1	5.13	48	313	2	-3.6	117	6	22.8	12	11
Portugal	2025 Q2	5.38	41	318	2	-4.1	119	6.4	24.1	12	11
Portugal	2025 Q3	5.02	37	262	1.9	-3.7	119	6	25.9	12	11
Portugal	2025 Q4	4.82	42	222	1.6	-2.8	120	5.8	28.2	12	11
Netherlands	2005 Q1	3.2	15	-20	1	-1.6	57	1.8	33	21	20
Netherlands	2005 Q2	3.29	15	-31	1	-1.1	57	1.9	35.4	21	20
Netherlands	2005 Q3	2.99	16	-101	1	-1.9	61	1.8	37.5	21	20
Netherlands	2005 Q4	3.2	15	-70	1	-2.3	59	1.9	39.3	21	20
Netherlands	2006 Q1	3.47	12	-33	1	-1	59	2	40.5	21	20
Netherlands	2006 Q2	2.92	11	-68	1	-1	59	1.7	41	21	20
Netherlands	2006 Q3	2.56	8	-134	1	-1.8	60	1.5	40.8	21	20
Netherlands	2006 Q4	2.59	8	-161	1	-1.8	57	1.5	39.9	21	20
Netherlands	2007 Q1	2.5	12	-170	1	-1.5	57	1.4	38.4	21	20
Netherlands	2007 Q2	2.5	11	-150	1	-1.2	58	1.4	36.4	21	20
Netherlands	2007 Q3	2.26	9	-104	1	-1.3	58	1.3	34.1	21	20
Netherlands	2007 Q4	2.51	10	-69	1	-1.8	60	1.5	31.7	21	20
Netherlands	2008 Q1	2.72	11	2	1	-1.5	58	1.6	29.5	21	20
Netherlands	2008 Q2	2.74	12	34	1	-1.6	58	1.6	27.5	21	20
Netherlands	2008 Q3	3.06	9	126	1	-1.5	59	1.8	26	21	20
Netherlands	2008 Q4	3.19	9	199	1	-1.4	57	1.8	25.2	21	20
Netherlands	2009 Q1	2.95	11	205	1	-1.7	59	1.7	25	21	20
Netherlands	2009 Q2	3.05	7	215	1	-1.4	58	1.8	25.6	21	20
Netherlands	2009 Q3	2.78	6	148	1	-1.7	58	1.6	26.8	21	20
Netherlands	2009 Q4	3.03	5	103	1	-0.9	61	1.8	28.6	21	20
Netherlands	2010 Q1	3.02	5	122	1	-1.4	59	1.8	30.8	21	20
Netherlands	2010 Q2	2.96	5	126	1	-1.8	56	1.7	33.1	21	20
Netherlands	2010 Q3	2.77	5	127	1	-1.6	58	1.6	35.5	21	20
Netherlands	2010 Q4	3.12	5	182	1	-0.8	58	1.8	37.6	21	20
Netherlands	2011 Q1	3.07	6	187	1	-1.2	55	1.7	39.3	21	20
Netherlands	2011 Q2	2.95	6	155	1	-0.7	60	1.8	40.5	21	20
Netherlands	2011 Q3	2.85	6	125	1	-0.8	58	1.7	41	21	20
Netherlands	2011 Q4	3	5	120	1	-1.4	57	1.7	40.8	21	20
Netherlands	2012 Q1	3.11	5	111	1	-0.8	59	1.8	39.8	21	20
Netherlands	2012 Q2	3.22	5	102	1	-0.4	58	1.9	38.3	21	20
Netherlands	2012 Q3	3.34	5	94	1	-1.3	58	1.9	36.3	21	20
Netherlands	2012 Q4	3.94	5	214	1	-1.5	59	2.3	34	21	20
Netherlands	2013 Q1	3.83	5	233	1	-0.6	61	2.3	31.6	21	20
Netherlands	2013 Q2	3.68	5	248	1	-1.2	58	2.1	29.3	21	20
Netherlands	2013 Q3	3.46	5	246	1	-1.1	56	1.9	27.4	21	20
Netherlands	2013 Q4	3.63	8	273	1	-1	60	2.2	26	21	20
Netherlands	2014 Q1	3.94	6	314	1	-1.7	59	2.3	25.2	21	20
Netherlands	2014 Q2	3.91	6	331	1	-1.2	56	2.2	25	21	20
Netherlands	2014 Q3	3.68	8	298	1	-1	58	2.1	25.6	21	20
Netherlands	2014 Q4	3.45	7	255	1	-1.7	62	2.1	26.9	21	20
Netherlands	2015 Q1	3.63	6	263	1	-1	57	2.1	28.7	21	20
Netherlands	2015 Q2	3.84	7	304	1	-2.1	60	2.3	30.9	21	20
Netherlands	2015 Q3	3.99	7	339	1	-0.7	57	2.3	33.3	21	20
Netherlands	2015 Q4	3.8	5	340	1	-2.1	60	2.3	35.6	21	20
Netherlands	2016 Q1	3.87	5	367	1	-1.1	57	2.2	37.7	21	20
Netherlands	2016 Q2	3.9	9	400	1	-2.2	57	2.2	39.4	21	20
Netherlands	2016 Q3	3.96	5	406	1	-1.8	57	2.3	40.5	21	20
Netherlands	2016 Q4	4.21	8	421	1	-1.2	57	2.4	41	21	20
Netherlands	2017 Q1	4.27	8	417	1	-0.9	58	2.5	40.7	21	20
Netherlands	2017 Q2	4.46	6	416	1	0.2	57	2.5	39.8	21	20
Netherlands	2017 Q3	4.48	12	398	1.2	-2.9	59	2.6	38.2	21	20
Netherlands	2017 Q4	4.56	14	386	1	-1.5	57	2.6	36.2	21	20
Netherlands	2018 Q1	4.73	11	393	1	-1	59	2.8	33.9	21	20
Netherlands	2018 Q2	4.33	11	353	1	-1.7	60	2.6	31.5	21	20
Netherlands	2018 Q3	4.24	13	474	1	-1.3	55	2.3	29.2	21	20
Netherlands	2018 Q4	4.11	12	451	1	-1.3	57	2.3	27.3	21	20
Netherlands	2019 Q1	3.93	14	413	1	-1.4	57	2.2	25.9	21	20
Netherlands	2019 Q2	3.85	14	375	1	-1.9	59	2.3	25.1	21	20
Netherlands	2019 Q3	4.27	16	397	1	-1.6	57	2.4	25.1	21	20
Netherlands	2019 Q4	4.03	20	363	1	-1.7	55	2.2	25.7	21	20
Netherlands	2020 Q1	4.3	18	380	1	-1.8	59	2.5	27	21	20
Netherlands	2020 Q2	3.83	19	313	1	-0.6	59	2.3	28.8	21	20
Netherlands	2020 Q3	3.73	17	273	1	-0.7	58	2.2	31	21	20
Netherlands	2020 Q4	3.78	18	218	1	-1.9	57	2.2	33.4	21	20
Netherlands	2021 Q1	3.94	14	154	1	-1.8	58	2.3	35.7	21	20
Netherlands	2021 Q2	4.14	13	134	1	-1.9	57	2.4	37.8	21	20
Netherlands	2021 Q3	4.36	12	176	1	-1.6	57	2.5	39.5	21	20
Netherlands	2021 Q4	4.27	15	187	1	-1.1	58	2.5	40.6	21	20
Netherlands	2022 Q1	4.14	18	194	1	-1.1	57	2.4	41	21	20
Netherlands	2022 Q2	4.38	14	198	1	-0.6	58	2.5	40.7	21	20
Netherlands	2022 Q3	4.32	12	172	1	-1.1	56	2.4	39.7	21	20
Netherlands	2022 Q4	3.97	14	117	1	-0.6	61	2.4	38.1	21	20
Netherlands	2023 Q1	3.65	8	65	1	-1.4	57	2.1	36.1	21	20
Netherlands	2023 Q2	3.39	6	29	1	-1.7	56	1.9	33.7	21	20
Netherlands	2023 Q3	3.53	6	73	1	-1	59	2.1	31.3	21	20
Netherlands	2023 Q4	3.57	10	97	1	-1.7	60	2.1	29.1	21	20
Netherlands	2024 Q1	3.76	12	136	1	-1.4	56	2.1	27.2	21	20
Netherlands	2024 Q2	3.64	11	144	1	-1.5	59	2.1	25.8	21	20
Netherlands	2024 Q3	3.69	10	169	1	-1.8	56	2.1	25.1	21	20
Netherlands	2024 Q4	3.86	9	196	1	-2.2	56	2.2	25.1	21	20
Netherlands	2025 Q1	3.78	14	178	1	-2.1	58	2.2	25.8	21	20
Netherlands	2025 Q2	3.9	12	170	1	-1.3	58	2.3	27.1	21	20
Netherlands	2025 Q3	3.72	11	132	1	-2.1	57	2.1	28.9	21	20
Netherlands	2025 Q4	3.62	12	102	1	-1.6	58	2.1	31.2	21	20
Austria	2005 Q1	3.3	20	-10	1.1	-2.2	62	2	31	20	19
Austria	2005 Q2	3.39	20	-21	1.1	-2.3	67	2.3	33.4	20	19
Austria	2005 Q3	3.08	21	-92	1	-2	62	1.9	35.5	20	19
Austria	2005 Q4	3.3	20	-60	1	-1.9	65	2.1	37.3	20	19
Austria	2006 Q1	3.59	17	-21	1	-2.2	68	2.4	38.5	20	19
Austria	2006 Q2	3	15	-60	1	-2.1	65	1.9	39	20	19
Austria	2006 Q3	2.61	11	-129	1	-1.8	63	1.6	38.8	20	19
Austria	2006 Q4	2.65	11	-155	1	-2	66	1.7	37.9	20	19
Austria	2007 Q1	2.55	16	-165	1.2	-2.7	64	1.6	36.4	20	19
Austria	2007 Q2	2.55	14	-145	1	-1.7	64	1.6	34.4	20	19
Austria	2007 Q3	2.29	12	-101	1	-1.4	66	1.5	32.1	20	19
Austria	2007 Q4	2.56	14	-64	1.1	-2.7	64	1.6	29.7	20	19
Austria	2008 Q1	2.79	15	9	1	-2.2	65	1.8	27.5	20	19
Austria	2008 Q2	2.81	16	41	1	-2.2	64	1.8	25.5	20	19
Austria	2008 Q3	3.15	12	135	1	-2.1	65	2	24	20	19
Austria	2008 Q4	3.29	12	209	1	-1.9	63	2.1	23.2	20	19
Austria	2009 Q1	3.03	15	213	1	-2.4	63	1.9	23	20	19
Austria	2009 Q2	3.14	9	224	1	-2	64	2	23.6	20	19
Austria	2009 Q3	2.85	7	155	1	-2.2	65	1.9	24.8	20	19
Austria	2009 Q4	3.12	5	112	1	-2.4	64	2	26.6	20	19
Austria	2010 Q1	3.1	5	130	1	-2.2	65	2	28.8	20	19
Austria	2010 Q2	3.05	5	135	1	-1.8	66	2	31.1	20	19
Austria	2010 Q3	2.84	5	134	1	-1.6	63	1.8	33.5	20	19
Austria	2010 Q4	3.21	5	191	1	-1.9	66	2.1	35.6	20	19
Austria	2011 Q1	3.16	6	196	1	-2.5	66	2.1	37.3	20	19
Austria	2011 Q2	3.03	7	163	1	-1.4	65	2	38.5	20	19
Austria	2011 Q3	2.93	6	133	1	-2.4	64	1.9	39	20	19
Austria	2011 Q4	3.09	5	129	1	-2.1	66	2	38.8	20	19
Austria	2012 Q1	3.2	5	120	1	-2	62	2	37.8	20	19
Austria	2012 Q2	3.32	5	112	1	-1.8	66	2.2	36.3	20	19
Austria	2012 Q3	3.45	5	105	1	-2	65	2.2	34.3	20	19
Austria	2012 Q4	4.09	5	229	1	-1.6	65	2.7	32	20	19
Austria	2013 Q1	3.97	5	247	1	-2.4	66	2.6	29.6	20	19
Austria	2013 Q2	3.82	5	262	1	-2.6	65	2.5	27.3	20	19
Austria	2013 Q3	3.57	5	257	1	-2.4	66	2.4	25.4	20	19
Austria	2013 Q4	3.76	9	286	1.1	-2.7	66	2.5	24	20	19
Austria	2014 Q1	4.1	6	330	1	-2.4	65	2.7	23.2	20	19
Austria	2014 Q2	4.06	6	346	1	-2	65	2.6	23	20	19
Austria	2014 Q3	3.81	9	311	1	-2	64	2.4	23.6	20	19
Austria	2014 Q4	3.56	7	266	1	-2.2	65	2.3	24.9	20	19
Austria	2015 Q1	3.76	7	276	1	-1.7	65	2.4	26.7	20	19
Austria	2015 Q2	3.98	7	318	1	-0.9	63	2.5	28.9	20	19
Austria	2015 Q3	4.15	7	355	1	-2.7	62	2.6	31.3	20	19
Austria	2015 Q4	3.95	5	355	1	-1.8	63	2.5	33.6	20	19
Austria	2016 Q1	4.02	5	382	1	-2.7	66	2.7	35.7	20	19
Austria	2016 Q2	4.05	11	415	1	-2.5	64	2.6	37.4	20	19
Austria	2016 Q3	4.12	5	422	1	-2.4	65	2.7	38.5	20	19
Austria	2016 Q4	4.38	8	438	1	-2	69	3	39	20	19
Austria	2017 Q1	4.44	9	434	1	-1.6	64	2.8	38.7	20	19
Austria	2017 Q2	4.65	6	435	1	-2.3	64	3	37.8	20	19
Austria	2017 Q3	4.67	14	417	1	-1.4	64	3	36.2	20	19
Austria	2017 Q4	4.75	17	405	1	-2	66	3.1	34.2	20	19
Austria	2018 Q1	4.94	13	414	1	-1.7	64	3.2	31.9	20	19
Austria	2018 Q2	4.51	13	371	1	-1.2	68	3.1	29.5	20	19
Austria	2018 Q3	4.41	15	491	1	-1.8	63	2.8	27.2	20	19
Austria	2018 Q4	4.27	14	467	1	-1.7	65	2.8	25.3	20	19
Austria	2019 Q1	4.08	17	428	1	-1.4	66	2.7	23.9	20	19
Austria	2019 Q2	4	17	390	1	-2.1	66	2.6	23.1	20	19
Austria	2019 Q3	4.44	20	414	1.1	-2.2	67	3	23.1	20	19
Austria	2019 Q4	4.18	25	378	1.3	-2.8	65	2.7	23.7	20	19
Austria	2020 Q1	4.48	23	398	1	-1.8	67	3	25	20	19
Austria	2020 Q2	3.97	23	327	1.2	-2.4	64	2.5	26.8	20	19
Austria	2020 Q3	3.87	22	287	1	-2	66	2.6	29	20	19
Austria	2020 Q4	3.92	22	232	1	-1.7	63	2.5	31.4	20	19
Austria	2021 Q1	4.09	17	169	1	-2.3	63	2.6	33.7	20	19
Austria	2021 Q2	4.31	15	151	1	-1.3	65	2.8	35.8	20	19
Austria	2021 Q3	4.55	14	195	1	-2.3	68	3.1	37.5	20	19
Austria	2021 Q4	4.44	18	204	1	-1.5	66	2.9	38.6	20	19
Austria	2022 Q1	4.3	22	210	1.2	-2.4	64	2.8	39	20	19
Austria	2022 Q2	4.56	17	216	1	-1.7	64	2.9	38.7	20	19
Austria	2022 Q3	4.5	14	190	1	-1.5	64	2.9	37.7	20	19
Austria	2022 Q4	4.12	17	132	1	-2.2	64	2.6	36.1	20	19
Austria	2023 Q1	3.78	9	78	1	-1.4	66	2.5	34.1	20	19
Austria	2023 Q2	3.5	7	40	1	-2.6	63	2.2	31.7	20	19
Austria	2023 Q3	3.65	6	85	1	-2	63	2.3	29.3	20	19
Austria	2023 Q4	3.7	11	110	1	-1.2	63	2.3	27.1	20	19
Austria	2024 Q1	3.9	14	150	1	-2.4	65	2.5	25.2	20	19
Austria	2024 Q2	3.77	13	157	1	-1.2	64	2.4	23.8	20	19
Austria	2024 Q3	3.82	11	182	1	-2.1	67	2.6	23.1	20	19
Austria	2024 Q4	4.01	10	211	1	-2.2	65	2.6	23.1	20	19
Austria	2025 Q1	3.92	16	192	1	-1.7	68	2.7	23.8	20	19
Austria	2025 Q2	4.05	15	185	1	-2.2	65	2.6	25.1	20	19
Austria	2025 Q3	3.86	14	146	1	-2	66	2.5	26.9	20	19
Austria	2025 Q4	3.75	15	115	1	-1.9	66	2.5	29.2	20	19

## Sheet: Panel B
Country/Region	Quarter	GeoPol Risk Index (GPR)	Trade Policy Uncert. Idx	Fragmentation Index (0–1)	EU–US Trade Intensity (%)	EU–US Exports (bn USD)	EU–US Imports (bn USD)	Trade Balance EU–US (bn USD)	Supply Chain Conc. Index	Reshoring Indicator (0–1)	FDI Inflows (bn USD)	TiVA Domestic Content (%)	Import Sub. Index (0–1)	Trade Diversion Index (0–1)	Sanctions Intensity (0–10)
Euro Area (Agg.)	2005 Q1	85	60	0.1	27.2	342	234	108	0.575	0	71	80.5	0.05	0.06	0
Euro Area (Agg.)	2005 Q2	93	72.5	0.106	27.6	346.3	237.8	108.5	0.582	0	74.7	81	0.05	0.074	0
Euro Area (Agg.)	2005 Q3	100.1	82.6	0.113	27.9	350.7	241.6	109.1	0.59	0	77.7	81.4	0.05	0.087	0
Euro Area (Agg.)	2005 Q4	105.5	88.6	0.119	28.2	354.9	245.3	109.6	0.597	0	79.6	81.8	0.05	0.1	0
Euro Area (Agg.)	2006 Q1	108.7	89.8	0.126	28.4	359.2	249.1	110.1	0.603	0	80	82	0.05	0.111	0
Euro Area (Agg.)	2006 Q2	109.5	86.4	0.132	28.4	363.4	252.7	110.7	0.608	0	78.8	82	0.05	0.121	0
Euro Area (Agg.)	2006 Q3	108.1	80.2	0.138	28.4	367.5	256.3	111.2	0.612	0	76.2	81.9	0.05	0.129	0
Euro Area (Agg.)	2006 Q4	105.2	73.2	0.145	28.1	371.5	259.9	111.6	0.616	0	72.5	81.6	0.05	0.136	0
Euro Area (Agg.)	2007 Q1	101.5	68	0.151	27.8	375.4	263.4	112	0.618	0	68.4	81.1	0.05	0.141	0
Euro Area (Agg.)	2007 Q2	97.9	66.5	0.157	27.4	379.2	266.7	112.5	0.618	0	64.3	80.5	0.05	0.143	0
Euro Area (Agg.)	2007 Q3	95.3	69.7	0.164	26.9	382.8	270	112.8	0.618	0	60.9	79.8	0.05	0.144	0
Euro Area (Agg.)	2007 Q4	94.6	77.7	0.17	26.4	386.3	273.2	113.1	0.617	0	58.7	79.1	0.05	0.142	0.1
Euro Area (Agg.)	2008 Q1	96.1	89.1	0.177	25.9	389.7	276.3	113.4	0.615	0	58	78.5	0.05	0.14	0.2
Euro Area (Agg.)	2008 Q2	99.9	101.9	0.183	25.5	392.9	279.2	113.7	0.611	0	58.8	77.9	0.05	0.136	0.2
Euro Area (Agg.)	2008 Q3	105.9	113.6	0.189	25.2	396	282.1	113.9	0.607	0	61.1	77.4	0.05	0.13	0.3
Euro Area (Agg.)	2008 Q4	113.3	122.1	0.196	25	398.9	284.8	114.1	0.603	0	64.4	77.1	0.05	0.125	0.4
Euro Area (Agg.)	2009 Q1	121.4	126.1	0.202	24.9	401.6	287.4	114.2	0.599	0	68.1	77	0.05	0.118	0.4
Euro Area (Agg.)	2009 Q2	129.3	125.1	0.209	24.9	404.2	289.9	114.3	0.595	0	71.6	77	0.05	0.113	0.5
Euro Area (Agg.)	2009 Q3	135.9	120.3	0.215	25.1	406.6	292.2	114.4	0.59	0	74.3	77.2	0.05	0.107	0.6
Euro Area (Agg.)	2009 Q4	140.7	113.4	0.221	25.4	408.8	294.4	114.4	0.587	0	75.8	77.6	0.05	0.102	0.6
Euro Area (Agg.)	2010 Q1	143.2	107	0.228	25.8	410.9	296.5	114.4	0.584	0.014	75.8	78	0.067	0.099	0.7
Euro Area (Agg.)	2010 Q2	143.4	103.1	0.234	26.2	412.8	298.5	114.3	0.582	0.035	74.2	78.5	0.092	0.097	0.8
Euro Area (Agg.)	2010 Q3	141.5	103.6	0.24	26.5	414.6	300.4	114.2	0.581	0.056	71.2	79	0.117	0.096	0.9
Euro Area (Agg.)	2010 Q4	138.2	109	0.247	26.9	416.2	302.1	114.1	0.582	0.076	67.3	79.5	0.141	0.099	0.9
Euro Area (Agg.)	2011 Q1	134.4	118.7	0.253	27.2	417.7	303.8	113.9	0.583	0.093	63.1	79.8	0.162	0.102	1
Euro Area (Agg.)	2011 Q2	131.1	131	0.26	27.3	419.1	305.4	113.7	0.586	0.107	59.2	80	0.178	0.108	1.1
Euro Area (Agg.)	2011 Q3	129	143.6	0.266	27.4	420.3	306.9	113.4	0.59	0.116	56.1	80	0.189	0.115	1.1
Euro Area (Agg.)	2011 Q4	128.8	154.1	0.272	27.3	421.5	308.3	113.2	0.595	0.12	54.3	79.9	0.194	0.125	1.2
Euro Area (Agg.)	2012 Q1	131	160.8	0.279	27	422.6	309.6	113	0.601	0.122	54	79.5	0.196	0.136	1.3
Euro Area (Agg.)	2012 Q2	135.5	162.6	0.285	26.7	423.6	310.9	112.7	0.607	0.118	55.4	79.1	0.192	0.148	1.4
Euro Area (Agg.)	2012 Q3	142	159.8	0.292	26.3	424.5	312.2	112.3	0.615	0.113	58	78.4	0.186	0.161	1.4
Euro Area (Agg.)	2012 Q4	149.7	153.8	0.298	25.8	425.4	313.4	112	0.622	0.104	61.4	77.8	0.175	0.175	1.5
Euro Area (Agg.)	2013 Q1	157.9	146.8	0.304	25.3	426.3	314.6	111.7	0.629	0.095	65.2	77.1	0.164	0.188	1.6
Euro Area (Agg.)	2013 Q2	165.4	141.2	0.311	24.8	427.2	315.8	111.4	0.637	0.088	68.5	76.4	0.156	0.202	1.6
Euro Area (Agg.)	2013 Q3	171.6	139.1	0.317	24.4	428.1	317	111.1	0.644	0.082	70.9	75.8	0.148	0.215	1.7
Euro Area (Agg.)	2013 Q4	175.8	141.7	0.323	24.1	428.9	318.2	110.7	0.65	0.079	72	75.4	0.145	0.227	1.8
Euro Area (Agg.)	2014 Q1	177.6	149.1	0.33	23.9	429.9	319.4	110.5	0.656	0.081	71.5	75.1	0.147	0.238	1.9
Euro Area (Agg.)	2014 Q2	177.1	160.1	0.336	23.8	430.9	320.7	110.2	0.661	0.086	69.4	75	0.153	0.247	1.9
Euro Area (Agg.)	2014 Q3	174.7	172.9	0.343	23.9	431.9	322.1	109.8	0.665	0.097	66.1	75	0.166	0.254	2
Euro Area (Agg.)	2014 Q4	171.2	184.9	0.349	24.1	433.1	323.4	109.7	0.667	0.111	62.1	75.2	0.183	0.259	2.1
Euro Area (Agg.)	2015 Q1	167.4	193.9	0.355	24.4	434.3	324.9	109.4	0.668	0.128	57.9	75.6	0.204	0.262	2.1
Euro Area (Agg.)	2015 Q2	164.3	198.5	0.362	24.7	435.7	326.5	109.2	0.669	0.149	54.1	76	0.229	0.264	2.2
Euro Area (Agg.)	2015 Q3	162.8	198.2	0.368	25.1	437.1	328.1	109	0.668	0.17	51.4	76.5	0.254	0.264	2.3
Euro Area (Agg.)	2015 Q4	163.3	193.8	0.375	25.5	438.7	329.9	108.8	0.666	0.191	50	77	0.279	0.262	2.4
Euro Area (Agg.)	2016 Q1	166.2	187.1	0.381	25.8	440.5	331.7	108.8	0.663	0.211	50.3	77.5	0.303	0.258	2.4
Euro Area (Agg.)	2016 Q2	171.3	180.4	0.387	26.1	442.4	333.7	108.7	0.659	0.227	52	77.8	0.322	0.253	2.5
Euro Area (Agg.)	2016 Q3	178.2	176.1	0.394	26.3	444.4	335.7	108.7	0.655	0.241	54.9	78	0.339	0.248	2.6
Euro Area (Agg.)	2016 Q4	186.2	175.9	0.4	26.3	446.6	337.9	108.7	0.651	0.25	58.5	78	0.35	0.241	2.6
Euro Area (Agg.)	2017 Q1	194.2	180.7	0.407	26.2	449	340.3	108.7	0.647	0.255	62.2	77.8	0.356	0.235	2.7
Euro Area (Agg.)	2017 Q2	201.5	189.9	0.413	26	451.5	342.7	108.8	0.642	0.255	65.3	77.5	0.356	0.229	2.8
Euro Area (Agg.)	2017 Q3	207.1	201.9	0.419	25.6	454.2	345.3	108.9	0.638	0.252	67.4	77	0.352	0.224	2.9
Euro Area (Agg.)	2017 Q4	210.6	214.7	0.426	25.2	457.1	348	109.1	0.636	0.246	68	76.4	0.345	0.221	2.9
Euro Area (Agg.)	2018 Q1	211.7	225.6	0.432	24.7	460.1	350.8	109.3	0.633	0.237	67	75.7	0.334	0.218	3
Euro Area (Agg.)	2018 Q2	210.6	232.8	0.438	24.2	463.3	353.7	109.6	0.632	0.228	64.6	75	0.324	0.217	3.1
Euro Area (Agg.)	2018 Q3	207.8	235.3	0.445	23.7	466.7	356.8	109.9	0.632	0.221	61	74.4	0.315	0.218	3.1
Euro Area (Agg.)	2018 Q4	204.1	233	0.451	23.3	470.2	359.9	110.3	0.633	0.215	56.9	73.8	0.308	0.221	3.2
Euro Area (Agg.)	2019 Q1	200.5	227.3	0.458	23	473.8	363.2	110.6	0.635	0.214	52.7	73.4	0.307	0.226	3.3
Euro Area (Agg.)	2019 Q2	197.8	220.3	0.464	22.8	477.6	366.6	111	0.638	0.215	49.2	73.1	0.308	0.232	3.4
Euro Area (Agg.)	2019 Q3	196.8	214.4	0.47	22.8	481.4	370	111.4	0.643	0.22	46.8	73	0.314	0.241	3.4
Euro Area (Agg.)	2019 Q4	198	211.8	0.477	22.8	485.4	373.6	111.8	0.648	0.231	45.9	73	0.327	0.252	3.5
Euro Area (Agg.)	2020 Q1	201.5	213.7	0.483	23	489.5	377.2	112.3	0.655	0.245	46.6	73.3	0.344	0.263	3.6
Euro Area (Agg.)	2020 Q2	207.3	220.5	0.49	23.3	493.7	380.8	112.9	0.662	0.264	48.7	73.6	0.367	0.276	3.6
Euro Area (Agg.)	2020 Q3	214.6	231.2	0.496	23.7	497.9	384.5	113.4	0.669	0.284	51.9	74.1	0.391	0.289	3.7
Euro Area (Agg.)	2020 Q4	222.6	243.8	0.502	24.1	502.2	388.3	113.9	0.677	0.305	55.6	74.6	0.416	0.303	3.8
Euro Area (Agg.)	2021 Q1	230.6	256.1	0.509	24.4	506.5	392.1	114.4	0.684	0.326	59.1	75.1	0.441	0.317	3.9
Euro Area (Agg.)	2021 Q2	237.4	265.6	0.515	24.8	510.8	395.9	114.9	0.691	0.345	62	75.5	0.464	0.33	3.9
Euro Area (Agg.)	2021 Q3	242.4	270.8	0.521	25.1	515.2	399.7	115.5	0.698	0.362	63.7	75.8	0.484	0.342	4
Euro Area (Agg.)	2021 Q4	245.2	271.2	0.528	25.2	519.5	403.4	116.1	0.704	0.375	63.8	76	0.5	0.354	4.1
Euro Area (Agg.)	2022 Q1	245.7	267.2	0.534	25.2	523.8	407.2	116.6	0.709	0.384	62.4	76	0.511	0.363	4.1
Euro Area (Agg.)	2022 Q2	244	260.7	0.541	25.1	528	410.9	117.1	0.714	0.389	59.6	75.8	0.517	0.372	4.2
Euro Area (Agg.)	2022 Q3	240.9	253.8	0.547	24.9	532.2	414.6	117.6	0.716	0.389	55.8	75.5	0.517	0.378	4.3
Euro Area (Agg.)	2022 Q4	237.1	249.1	0.553	24.5	536.3	418.2	118.1	0.718	0.385	51.6	75	0.512	0.382	4.3
Euro Area (Agg.)	2023 Q1	233.6	248.4	0.56	24.1	540.4	421.8	118.6	0.719	0.379	47.6	74.4	0.505	0.384	4.4
Euro Area (Agg.)	2023 Q2	231.3	252.4	0.566	23.6	544.3	425.3	119	0.718	0.371	44.4	73.7	0.495	0.384	4.5
Euro Area (Agg.)	2023 Q3	230.9	261.1	0.573	23.1	548.1	428.7	119.4	0.717	0.363	42.4	73	0.486	0.383	4.6
Euro Area (Agg.)	2023 Q4	232.8	272.9	0.579	22.6	551.8	432	119.8	0.714	0.355	42	72.3	0.476	0.38	4.6
Euro Area (Agg.)	2024 Q1	237.1	285.7	0.585	22.2	555.3	435.2	120.1	0.711	0.349	43.1	71.8	0.469	0.375	4.7
Euro Area (Agg.)	2024 Q2	243.3	297	0.592	21.9	558.7	438.3	120.4	0.707	0.347	45.5	71.3	0.466	0.37	4.8
Euro Area (Agg.)	2024 Q3	250.9	304.8	0.598	21.7	562	441.3	120.7	0.703	0.349	48.9	71.1	0.469	0.364	4.8
Euro Area (Agg.)	2024 Q4	259.1	307.9	0.604	21.7	565.1	444.1	121	0.698	0.354	52.7	71	0.475	0.358	4.9
Euro Area (Agg.)	2025 Q1	266.8	306.2	0.611	21.8	568	446.9	121.1	0.694	0.366	56.1	71	0.489	0.352	5
Euro Area (Agg.)	2025 Q2	273.2	300.9	0.617	22	570.8	449.5	121.3	0.69	0.38	58.6	71.3	0.506	0.347	5.1
Euro Area (Agg.)	2025 Q3	277.6	293.9	0.624	22.2	573.4	452	121.4	0.687	0.399	59.9	71.6	0.529	0.342	5.1
Euro Area (Agg.)	2025 Q4	279.7	287.7	0.63	22.6	575.8	454.4	121.4	0.684	0.418	59.6	72.1	0.552	0.339	5.2
United States	2005 Q1	97	76	0.14	26.9	372.4	254.8	117.6	0.585	0	73.4	79.9	0.05	0.084	0
United States	2005 Q2	105	88.5	0.146	27.3	377.1	258.9	118.2	0.592	0	77.1	80.4	0.05	0.098	0
United States	2005 Q3	112.1	98.6	0.153	27.6	381.8	263	118.8	0.6	0	80.1	80.8	0.05	0.111	0
United States	2005 Q4	117.5	104.6	0.159	27.9	386.5	267.1	119.4	0.607	0	82	81.2	0.05	0.124	0
United States	2006 Q1	120.7	105.8	0.166	28.1	391.1	271.2	119.9	0.613	0.013	82.4	81.4	0.066	0.135	0
United States	2006 Q2	121.5	102.4	0.172	28.1	395.7	275.2	120.5	0.618	0.022	81.2	81.4	0.076	0.145	0
United States	2006 Q3	120.1	96.2	0.178	28	400.1	279.1	121	0.622	0.027	78.6	81.3	0.082	0.153	0
United States	2006 Q4	117.2	89.2	0.185	27.8	404.5	283	121.5	0.626	0.028	74.9	81	0.084	0.16	0.1
United States	2007 Q1	113.5	84	0.191	27.5	408.7	286.8	121.9	0.628	0.025	70.8	80.5	0.08	0.165	0.2
United States	2007 Q2	109.9	82.5	0.197	27.1	412.9	290.5	122.4	0.628	0.018	66.7	79.9	0.072	0.167	0.3
United States	2007 Q3	107.3	85.7	0.204	26.6	416.8	294	122.8	0.628	0.011	63.3	79.2	0.063	0.168	0.3
United States	2007 Q4	106.6	93.7	0.21	26.1	420.7	297.5	123.2	0.627	0.002	61.1	78.5	0.052	0.166	0.4
United States	2008 Q1	108.1	105.1	0.217	25.6	424.3	300.8	123.5	0.625	0	60.4	77.9	0.05	0.164	0.5
United States	2008 Q2	111.9	117.9	0.223	25.2	427.9	304.1	123.8	0.621	0	61.2	77.3	0.05	0.16	0.5
United States	2008 Q3	117.9	129.6	0.229	24.9	431.2	307.2	124	0.617	0	63.5	76.8	0.05	0.154	0.6
United States	2008 Q4	125.3	138.1	0.236	24.6	434.4	310.1	124.3	0.613	0	66.8	76.5	0.05	0.149	0.7
United States	2009 Q1	133.4	142.1	0.242	24.6	437.3	312.9	124.4	0.609	0	70.5	76.4	0.05	0.142	0.8
United States	2009 Q2	141.3	141.1	0.249	24.6	440.1	315.6	124.5	0.605	0.003	74	76.4	0.054	0.137	0.8
United States	2009 Q3	147.9	136.3	0.255	24.8	442.7	318.2	124.5	0.6	0.016	76.7	76.6	0.069	0.131	0.9
United States	2009 Q4	152.7	129.4	0.261	25.1	445.2	320.6	124.6	0.597	0.033	78.2	77	0.09	0.126	1
United States	2010 Q1	155.2	123	0.268	25.4	447.4	322.9	124.5	0.594	0.054	78.2	77.4	0.115	0.123	1
United States	2010 Q2	155.4	119.1	0.274	25.8	449.5	325	124.5	0.592	0.075	76.6	77.9	0.14	0.121	1.1
United States	2010 Q3	153.5	119.6	0.28	26.2	451.5	327.1	124.4	0.591	0.096	73.6	78.4	0.165	0.12	1.2
United States	2010 Q4	150.2	125	0.287	26.6	453.2	329	124.2	0.592	0.116	69.7	78.9	0.189	0.123	1.3
United States	2011 Q1	146.4	134.7	0.293	26.8	454.9	330.8	124.1	0.593	0.133	65.5	79.2	0.21	0.126	1.3
United States	2011 Q2	143.1	147	0.3	27	456.3	332.5	123.8	0.596	0.147	61.6	79.4	0.226	0.132	1.4
United States	2011 Q3	141	159.6	0.306	27	457.7	334.1	123.6	0.6	0.156	58.5	79.4	0.237	0.139	1.5
United States	2011 Q4	140.8	170.1	0.312	27	459	335.7	123.3	0.605	0.16	56.7	79.3	0.242	0.149	1.5
United States	2012 Q1	143	176.8	0.319	26.7	460.1	337.1	123	0.611	0.162	56.4	78.9	0.244	0.16	1.6
United States	2012 Q2	147.5	178.6	0.325	26.4	461.2	338.5	122.7	0.617	0.158	57.8	78.5	0.24	0.172	1.7
United States	2012 Q3	154	175.8	0.332	26	462.3	339.9	122.4	0.625	0.153	60.4	77.8	0.234	0.185	1.8
United States	2012 Q4	161.7	169.8	0.338	25.5	463.2	341.2	122	0.632	0.144	63.8	77.2	0.223	0.199	1.8
United States	2013 Q1	169.9	162.8	0.344	25	464.2	342.5	121.7	0.639	0.135	67.6	76.5	0.212	0.212	1.9
United States	2013 Q2	177.4	157.2	0.351	24.5	465.1	343.8	121.3	0.647	0.128	70.9	75.8	0.204	0.226	2
United States	2013 Q3	183.6	155.1	0.357	24.1	466.1	345.1	121	0.654	0.122	73.3	75.2	0.196	0.239	2
United States	2013 Q4	187.8	157.7	0.363	23.8	467.1	346.5	120.6	0.66	0.119	74.4	74.8	0.193	0.251	2.1
United States	2014 Q1	189.6	165.1	0.37	23.6	468.1	347.8	120.3	0.666	0.121	73.9	74.5	0.195	0.262	2.2
United States	2014 Q2	189.1	176.1	0.376	23.5	469.2	349.2	120	0.671	0.126	71.8	74.4	0.201	0.271	2.2
United States	2014 Q3	186.7	188.9	0.383	23.6	470.3	350.7	119.6	0.675	0.137	68.5	74.4	0.214	0.278	2.3
United States	2014 Q4	183.2	200.9	0.389	23.7	471.6	352.2	119.4	0.677	0.151	64.5	74.6	0.231	0.283	2.4
United States	2015 Q1	179.4	209.9	0.395	24	472.9	353.8	119.1	0.678	0.168	60.3	75	0.252	0.286	2.5
United States	2015 Q2	176.3	214.5	0.402	24.4	474.4	355.5	118.9	0.679	0.189	56.5	75.4	0.277	0.288	2.5
United States	2015 Q3	174.8	214.2	0.408	24.8	476	357.3	118.7	0.678	0.21	53.8	75.9	0.302	0.288	2.6
United States	2015 Q4	175.3	209.8	0.415	25.2	477.7	359.2	118.5	0.676	0.231	52.4	76.4	0.327	0.286	2.7
United States	2016 Q1	178.2	203.1	0.421	25.5	479.6	361.2	118.4	0.673	0.251	52.7	76.9	0.351	0.282	2.7
United States	2016 Q2	183.3	196.4	0.427	25.8	481.7	363.3	118.4	0.669	0.267	54.4	77.2	0.37	0.277	2.8
United States	2016 Q3	190.2	192.1	0.434	25.9	483.9	365.6	118.3	0.665	0.281	57.3	77.4	0.387	0.272	2.9
United States	2016 Q4	198.2	191.9	0.44	26	486.3	368	118.3	0.661	0.29	60.9	77.4	0.398	0.265	3
United States	2017 Q1	206.2	196.7	0.447	25.9	488.9	370.5	118.4	0.657	0.295	64.6	77.2	0.404	0.259	3
United States	2017 Q2	213.5	205.9	0.453	25.6	491.7	373.2	118.5	0.652	0.295	67.7	76.9	0.404	0.253	3.1
United States	2017 Q3	219.1	217.9	0.459	25.3	494.6	376	118.6	0.648	0.292	69.8	76.4	0.4	0.248	3.2
United States	2017 Q4	222.6	230.7	0.466	24.9	497.7	378.9	118.8	0.646	0.286	70.4	75.8	0.393	0.245	3.2
United States	2018 Q1	223.7	241.6	0.472	24.4	501	382	119	0.643	0.277	69.4	75.1	0.382	0.242	3.3
United States	2018 Q2	222.6	248.8	0.478	23.9	504.5	385.2	119.3	0.642	0.268	67	74.4	0.372	0.241	3.4
United States	2018 Q3	219.8	251.3	0.485	23.4	508.2	388.5	119.7	0.642	0.261	63.4	73.8	0.363	0.242	3.5
United States	2018 Q4	216.1	249	0.491	23	512	391.9	120.1	0.643	0.255	59.3	73.2	0.356	0.245	3.5
United States	2019 Q1	212.5	243.3	0.498	22.7	515.9	395.5	120.4	0.645	0.254	55.1	72.8	0.355	0.25	3.6
United States	2019 Q2	209.8	236.3	0.504	22.5	520	399.2	120.8	0.648	0.255	51.6	72.5	0.356	0.256	3.7
United States	2019 Q3	208.8	230.4	0.51	22.4	524.2	402.9	121.3	0.653	0.26	49.2	72.4	0.362	0.265	3.7
United States	2019 Q4	210	227.8	0.517	22.5	528.6	406.8	121.8	0.658	0.271	48.3	72.4	0.375	0.276	3.8
United States	2020 Q1	213.5	229.7	0.523	22.7	533	410.7	122.3	0.665	0.285	49	72.7	0.392	0.287	3.9
United States	2020 Q2	219.3	236.5	0.53	23	537.6	414.7	122.9	0.672	0.304	51.1	73	0.415	0.3	4
United States	2020 Q3	226.6	247.2	0.536	23.3	542.2	418.7	123.5	0.679	0.324	54.3	73.5	0.439	0.313	4
United States	2020 Q4	234.6	259.8	0.542	23.7	546.8	422.8	124	0.687	0.345	58	74	0.464	0.327	4.1
United States	2021 Q1	242.6	272.1	0.549	24.1	551.5	426.9	124.6	0.694	0.366	61.5	74.5	0.489	0.341	4.2
United States	2021 Q2	249.4	281.6	0.555	24.5	556.2	431.1	125.1	0.701	0.385	64.4	74.9	0.512	0.354	4.2
United States	2021 Q3	254.4	286.8	0.561	24.7	561	435.2	125.8	0.708	0.402	66.1	75.2	0.532	0.366	4.3
United States	2021 Q4	257.2	287.2	0.568	24.9	565.7	439.3	126.4	0.714	0.415	66.2	75.4	0.548	0.378	4.4
United States	2022 Q1	257.7	283.2	0.574	24.9	570.3	443.4	126.9	0.719	0.424	64.8	75.4	0.559	0.387	4.5
United States	2022 Q2	256	276.7	0.581	24.8	575	447.5	127.5	0.724	0.429	62	75.2	0.565	0.396	4.5
United States	2022 Q3	252.9	269.8	0.587	24.6	579.5	451.5	128	0.726	0.429	58.2	74.9	0.565	0.402	4.6
United States	2022 Q4	249.1	265.1	0.593	24.2	584	455.4	128.6	0.728	0.425	54	74.4	0.56	0.406	4.7
United States	2023 Q1	245.6	264.4	0.6	23.8	588.4	459.3	129.1	0.729	0.419	50	73.8	0.553	0.408	4.7
United States	2023 Q2	243.3	268.4	0.606	23.3	592.7	463.1	129.6	0.728	0.411	46.8	73.1	0.543	0.408	4.8
United States	2023 Q3	242.9	277.1	0.613	22.8	596.8	466.8	130	0.727	0.403	44.8	72.4	0.534	0.407	4.9
United States	2023 Q4	244.8	288.9	0.619	22.3	600.8	470.4	130.4	0.724	0.395	44.4	71.7	0.524	0.404	5
United States	2024 Q1	249.1	301.7	0.625	21.9	604.7	473.9	130.8	0.721	0.389	45.5	71.2	0.517	0.399	5
United States	2024 Q2	255.3	313	0.632	21.6	608.4	477.3	131.1	0.717	0.387	47.9	70.7	0.514	0.394	5.1
United States	2024 Q3	262.9	320.8	0.638	21.4	611.9	480.5	131.4	0.713	0.389	51.3	70.5	0.517	0.388	5.2
United States	2024 Q4	271.1	323.9	0.644	21.4	615.3	483.6	131.7	0.708	0.394	55.1	70.4	0.523	0.382	5.2
United States	2025 Q1	278.8	322.2	0.651	21.4	618.5	486.6	131.9	0.704	0.406	58.5	70.4	0.537	0.376	5.3
United States	2025 Q2	285.2	316.9	0.657	21.6	621.5	489.5	132	0.7	0.42	61	70.7	0.554	0.371	5.4
United States	2025 Q3	289.6	309.9	0.664	21.9	624.3	492.2	132.1	0.697	0.439	62.3	71	0.577	0.366	5.5
United States	2025 Q4	291.7	303.7	0.67	22.3	627	494.7	132.3	0.694	0.458	62	71.5	0.6	0.363	5.5
Germany	2005 Q1	107.5	90	0.175	26.6	399	273	126	0.594	0	75.5	79.4	0.05	0.105	0
Germany	2005 Q2	115.5	102.5	0.181	27	404.1	277.4	126.7	0.601	0	79.2	79.9	0.05	0.119	0
Germany	2005 Q3	122.6	112.6	0.188	27.3	409.1	281.8	127.3	0.609	0.016	82.2	80.3	0.069	0.132	0
Germany	2005 Q4	128	118.6	0.194	27.6	414.1	286.2	127.9	0.615	0.033	84.1	80.7	0.09	0.145	0.1
Germany	2006 Q1	131.2	119.8	0.201	27.8	419	290.6	128.4	0.622	0.048	84.5	80.8	0.108	0.156	0.2
Germany	2006 Q2	132	116.4	0.207	27.8	423.9	294.8	129.1	0.627	0.057	83.3	80.9	0.118	0.166	0.3
Germany	2006 Q3	130.6	110.2	0.213	27.8	428.7	299.1	129.6	0.631	0.062	80.7	80.8	0.124	0.174	0.3
Germany	2006 Q4	127.7	103.2	0.22	27.5	433.4	303.2	130.2	0.635	0.063	77	80.4	0.126	0.181	0.4
Germany	2007 Q1	124	98	0.226	27.2	437.9	307.3	130.6	0.636	0.06	72.9	80	0.122	0.186	0.5
Germany	2007 Q2	120.4	96.5	0.232	26.8	442.3	311.2	131.1	0.637	0.053	68.8	79.4	0.114	0.188	0.5
Germany	2007 Q3	117.8	99.7	0.239	26.3	446.6	315	131.6	0.637	0.046	65.4	78.7	0.105	0.189	0.6
Germany	2007 Q4	117.1	107.7	0.245	25.8	450.7	318.7	132	0.636	0.037	63.2	78	0.094	0.187	0.7
Germany	2008 Q1	118.6	119.1	0.252	25.3	454.7	322.3	132.4	0.633	0.03	62.5	77.3	0.086	0.185	0.8
Germany	2008 Q2	122.4	131.9	0.258	24.9	458.4	325.8	132.6	0.63	0.024	63.3	76.8	0.079	0.181	0.8
Germany	2008 Q3	128.4	143.6	0.264	24.6	462	329.1	132.9	0.626	0.02	65.6	76.3	0.074	0.175	0.9
Germany	2008 Q4	135.8	152.1	0.271	24.4	465.4	332.3	133.1	0.622	0.022	68.9	76	0.076	0.17	1
Germany	2009 Q1	143.9	156.1	0.277	24.3	468.6	335.3	133.3	0.617	0.027	72.6	75.9	0.082	0.163	1
Germany	2009 Q2	151.8	155.1	0.284	24.3	471.6	338.2	133.4	0.613	0.038	76.1	75.9	0.096	0.158	1.1
Germany	2009 Q3	158.4	150.3	0.29	24.5	474.4	340.9	133.5	0.609	0.051	78.8	76.1	0.111	0.152	1.2
Germany	2009 Q4	163.2	143.4	0.296	24.8	477	343.5	133.5	0.606	0.068	80.3	76.5	0.132	0.147	1.2
Germany	2010 Q1	165.7	137	0.303	25.2	479.4	346	133.4	0.603	0.089	80.3	76.9	0.157	0.144	1.3
Germany	2010 Q2	165.9	133.1	0.309	25.6	481.6	348.3	133.3	0.601	0.11	78.7	77.4	0.182	0.142	1.4
Germany	2010 Q3	164	133.6	0.315	25.9	483.7	350.4	133.3	0.6	0.131	75.7	77.9	0.207	0.141	1.5
Germany	2010 Q4	160.7	139	0.322	26.3	485.6	352.5	133.1	0.601	0.151	71.8	78.3	0.231	0.144	1.5
Germany	2011 Q1	156.9	148.7	0.328	26.6	487.3	354.4	132.9	0.602	0.168	67.6	78.7	0.252	0.147	1.6
Germany	2011 Q2	153.6	161	0.335	26.7	488.9	356.3	132.6	0.605	0.182	63.7	78.9	0.268	0.153	1.7
Germany	2011 Q3	151.5	173.6	0.341	26.8	490.4	358	132.4	0.609	0.191	60.6	78.9	0.279	0.16	1.7
Germany	2011 Q4	151.3	184.1	0.347	26.7	491.8	359.6	132.2	0.614	0.195	58.8	78.7	0.284	0.17	1.8
Germany	2012 Q1	153.5	190.8	0.354	26.4	493	361.2	131.8	0.62	0.197	58.5	78.4	0.286	0.181	1.9
Germany	2012 Q2	158	192.6	0.36	26.1	494.2	362.7	131.5	0.626	0.193	59.9	77.9	0.282	0.193	2
Germany	2012 Q3	164.5	189.8	0.367	25.7	495.3	364.2	131.1	0.633	0.188	62.5	77.3	0.276	0.206	2
Germany	2012 Q4	172.2	183.8	0.373	25.2	496.3	365.6	130.7	0.641	0.179	65.9	76.7	0.265	0.22	2.1
Germany	2013 Q1	180.4	176.8	0.379	24.7	497.4	367	130.4	0.648	0.17	69.7	76	0.254	0.233	2.2
Germany	2013 Q2	187.9	171.2	0.386	24.2	498.4	368.4	130	0.656	0.163	73	75.3	0.246	0.247	2.2
Germany	2013 Q3	194.1	169.1	0.392	23.8	499.4	369.8	129.6	0.663	0.157	75.4	74.7	0.238	0.26	2.3
Germany	2013 Q4	198.3	171.7	0.398	23.5	500.4	371.2	129.2	0.669	0.154	76.5	74.3	0.235	0.272	2.4
Germany	2014 Q1	200.1	179.1	0.405	23.3	501.5	372.7	128.8	0.675	0.156	76	74	0.237	0.283	2.5
Germany	2014 Q2	199.6	190.1	0.411	23.2	502.7	374.2	128.5	0.68	0.161	73.9	73.8	0.243	0.292	2.5
Germany	2014 Q3	197.2	202.9	0.418	23.3	503.9	375.7	128.2	0.684	0.172	70.6	73.9	0.256	0.299	2.6
Germany	2014 Q4	193.7	214.9	0.424	23.5	505.3	377.4	127.9	0.686	0.186	66.6	74.1	0.273	0.304	2.7
Germany	2015 Q1	189.9	223.9	0.43	23.8	506.7	379.1	127.6	0.687	0.203	62.4	74.5	0.294	0.307	2.7
Germany	2015 Q2	186.8	228.5	0.437	24.1	508.3	380.9	127.4	0.687	0.224	58.6	74.9	0.319	0.309	2.8
Germany	2015 Q3	185.3	228.2	0.443	24.5	510	382.8	127.2	0.686	0.245	55.9	75.4	0.344	0.309	2.9
Germany	2015 Q4	185.8	223.8	0.45	24.9	511.8	384.8	127	0.685	0.266	54.5	75.9	0.369	0.307	3
Germany	2016 Q1	188.7	217.1	0.456	25.2	513.9	387	126.9	0.682	0.286	54.8	76.3	0.393	0.303	3
Germany	2016 Q2	193.8	210.4	0.462	25.5	516.1	389.3	126.8	0.678	0.302	56.5	76.7	0.412	0.298	3.1
Germany	2016 Q3	200.7	206.1	0.469	25.7	518.5	391.7	126.8	0.674	0.316	59.4	76.9	0.429	0.293	3.2
Germany	2016 Q4	208.7	205.9	0.475	25.7	521	394.3	126.7	0.669	0.325	63	76.9	0.44	0.286	3.2
Germany	2017 Q1	216.7	210.7	0.482	25.6	523.8	397	126.8	0.665	0.33	66.7	76.7	0.446	0.28	3.3
Germany	2017 Q2	224	219.9	0.488	25.4	526.8	399.8	127	0.661	0.33	69.8	76.4	0.446	0.274	3.4
Germany	2017 Q3	229.6	231.9	0.494	25	529.9	402.8	127.1	0.657	0.327	71.9	75.9	0.442	0.269	3.5
Germany	2017 Q4	233.1	244.7	0.501	24.6	533.3	406	127.3	0.654	0.321	72.5	75.3	0.435	0.266	3.5
Germany	2018 Q1	234.2	255.6	0.507	24.1	536.8	409.3	127.5	0.652	0.312	71.5	74.6	0.424	0.263	3.6
Germany	2018 Q2	233.1	262.8	0.513	23.6	540.5	412.7	127.8	0.651	0.303	69.1	73.9	0.414	0.262	3.7
Germany	2018 Q3	230.3	265.3	0.52	23.1	544.4	416.2	128.2	0.651	0.296	65.5	73.3	0.405	0.263	3.7
Germany	2018 Q4	226.6	263	0.526	22.7	548.5	419.9	128.6	0.652	0.29	61.4	72.7	0.398	0.266	3.8
Germany	2019 Q1	223	257.3	0.533	22.4	552.8	423.7	129.1	0.654	0.289	57.2	72.2	0.397	0.271	3.9
Germany	2019 Q2	220.3	250.3	0.539	22.2	557.2	427.7	129.5	0.657	0.29	53.7	71.9	0.398	0.277	4
Germany	2019 Q3	219.3	244.4	0.545	22.2	561.7	431.7	130	0.662	0.295	51.3	71.8	0.404	0.286	4
Germany	2019 Q4	220.5	241.8	0.552	22.2	566.3	435.8	130.5	0.667	0.306	50.4	71.9	0.417	0.297	4.1
Germany	2020 Q1	224	243.7	0.558	22.4	571.1	440	131.1	0.673	0.32	51.1	72.1	0.434	0.308	4.2
Germany	2020 Q2	229.8	250.5	0.565	22.7	576	444.3	131.7	0.681	0.339	53.2	72.5	0.457	0.321	4.2
Germany	2020 Q3	237.1	261.2	0.571	23.1	580.9	448.6	132.3	0.688	0.359	56.4	72.9	0.481	0.334	4.3
Germany	2020 Q4	245.1	273.8	0.577	23.5	585.9	453	132.9	0.695	0.38	60.1	73.4	0.506	0.348	4.4
Germany	2021 Q1	253.1	286.1	0.584	23.8	590.9	457.4	133.5	0.703	0.401	63.6	73.9	0.531	0.362	4.5
Germany	2021 Q2	259.9	295.6	0.59	24.2	596	461.8	134.2	0.71	0.42	66.5	74.4	0.554	0.375	4.5
Germany	2021 Q3	264.9	300.8	0.596	24.5	601	466.3	134.7	0.717	0.437	68.2	74.7	0.574	0.387	4.6
Germany	2021 Q4	267.7	301.2	0.603	24.6	606.1	470.7	135.4	0.723	0.45	68.3	74.9	0.59	0.399	4.7
Germany	2022 Q1	268.2	297.2	0.609	24.6	611.1	475.1	136	0.728	0.459	66.9	74.9	0.601	0.408	4.7
Germany	2022 Q2	266.5	290.7	0.616	24.5	616	479.4	136.6	0.732	0.464	64.1	74.7	0.607	0.417	4.8
Germany	2022 Q3	263.4	283.8	0.622	24.3	620.9	483.7	137.2	0.735	0.464	60.3	74.3	0.607	0.423	4.9
Germany	2022 Q4	259.6	279.1	0.628	23.9	625.7	488	137.7	0.737	0.46	56.1	73.9	0.602	0.427	4.9
Germany	2023 Q1	256.1	278.4	0.635	23.5	630.4	492.1	138.3	0.738	0.454	52.1	73.2	0.595	0.429	5
Germany	2023 Q2	253.8	282.4	0.641	23	635	496.2	138.8	0.737	0.446	48.9	72.6	0.585	0.429	5.1
Germany	2023 Q3	253.4	291.1	0.648	22.5	639.4	500.1	139.3	0.736	0.438	46.9	71.9	0.576	0.428	5.2
Germany	2023 Q4	255.3	302.9	0.654	22	643.7	504	139.7	0.733	0.43	46.5	71.2	0.566	0.425	5.2
Germany	2024 Q1	259.6	315.7	0.66	21.6	647.9	507.7	140.2	0.73	0.424	47.6	70.7	0.559	0.42	5.3
Germany	2024 Q2	265.8	327	0.667	21.3	651.9	511.3	140.6	0.726	0.422	50	70.2	0.556	0.415	5.4
Germany	2024 Q3	273.4	334.8	0.673	21.1	655.6	514.8	140.8	0.721	0.424	53.4	69.9	0.559	0.409	5.4
Germany	2024 Q4	281.6	337.9	0.679	21.1	659.3	518.2	141.1	0.717	0.429	57.2	69.8	0.565	0.403	5.5
Germany	2025 Q1	289.3	336.2	0.686	21.2	662.7	521.4	141.3	0.713	0.441	60.6	69.9	0.579	0.397	5.6
Germany	2025 Q2	295.7	330.9	0.692	21.4	665.9	524.4	141.5	0.709	0.455	63.1	70.1	0.596	0.392	5.7
Germany	2025 Q3	300.1	323.9	0.699	21.6	668.9	527.3	141.6	0.706	0.474	64.4	70.5	0.619	0.387	5.7
Germany	2025 Q4	302.2	317.7	0.705	22	671.8	530.1	141.7	0.703	0.493	64.1	71	0.642	0.384	5.8
France	2005 Q1	89.5	66	0.115	27.1	353.4	241.8	111.6	0.579	0	71.9	80.3	0.05	0.069	0
France	2005 Q2	97.5	78.5	0.121	27.5	357.9	245.7	112.2	0.586	0	75.6	80.8	0.05	0.083	0
France	2005 Q3	104.6	88.6	0.128	27.8	362.3	249.6	112.7	0.594	0	78.6	81.2	0.05	0.096	0
France	2005 Q4	110	94.6	0.134	28.1	366.8	253.5	113.3	0.6	0	80.5	81.6	0.05	0.109	0
France	2006 Q1	113.2	95.8	0.141	28.3	371.2	257.4	113.8	0.607	0	80.9	81.7	0.05	0.12	0
France	2006 Q2	114	92.4	0.147	28.3	375.5	261.2	114.3	0.612	0	79.7	81.8	0.05	0.13	0
France	2006 Q3	112.6	86.2	0.153	28.2	379.7	264.9	114.8	0.616	0.002	77.1	81.7	0.052	0.138	0
France	2006 Q4	109.7	79.2	0.16	28	383.8	268.6	115.2	0.62	0.003	73.4	81.3	0.054	0.145	0
France	2007 Q1	106	74	0.166	27.7	387.9	272.1	115.8	0.621	0	69.3	80.9	0.05	0.15	0
France	2007 Q2	102.4	72.5	0.172	27.3	391.8	275.6	116.2	0.622	0	65.2	80.3	0.05	0.152	0.1
France	2007 Q3	99.8	75.7	0.179	26.8	395.6	279	116.6	0.622	0	61.8	79.6	0.05	0.153	0.1
France	2007 Q4	99.1	83.7	0.185	26.3	399.2	282.3	116.9	0.621	0	59.6	78.9	0.05	0.151	0.2
France	2008 Q1	100.6	95.1	0.192	25.8	402.7	285.5	117.2	0.618	0	58.9	78.2	0.05	0.149	0.3
France	2008 Q2	104.4	107.9	0.198	25.4	406	288.6	117.4	0.615	0	59.7	77.7	0.05	0.145	0.3
France	2008 Q3	110.4	119.6	0.204	25.1	409.2	291.5	117.7	0.611	0	62	77.2	0.05	0.139	0.4
France	2008 Q4	117.8	128.1	0.211	24.8	412.2	294.3	117.9	0.607	0	65.3	76.9	0.05	0.134	0.5
France	2009 Q1	125.9	132.1	0.217	24.8	415	297	118	0.602	0	69	76.8	0.05	0.127	0.6
France	2009 Q2	133.8	131.1	0.224	24.8	417.7	299.5	118.2	0.598	0	72.5	76.8	0.05	0.122	0.6
France	2009 Q3	140.4	126.3	0.23	25	420.2	302	118.2	0.594	0	75.2	77	0.05	0.116	0.7
France	2009 Q4	145.2	119.4	0.236	25.3	422.5	304.2	118.3	0.591	0.008	76.7	77.4	0.06	0.111	0.8
France	2010 Q1	147.7	113	0.243	25.6	424.6	306.4	118.2	0.588	0.029	76.7	77.8	0.085	0.108	0.8
France	2010 Q2	147.9	109.1	0.249	26	426.6	308.5	118.1	0.586	0.05	75.1	78.3	0.11	0.106	0.9
France	2010 Q3	146	109.6	0.255	26.4	428.4	310.4	118	0.585	0.071	72.1	78.8	0.135	0.105	1
France	2010 Q4	142.7	115	0.262	26.8	430.1	312.2	117.9	0.586	0.091	68.2	79.2	0.159	0.108	1.1
France	2011 Q1	138.9	124.7	0.268	27	431.6	313.9	117.7	0.587	0.108	64	79.6	0.18	0.111	1.1
France	2011 Q2	135.6	137	0.275	27.2	433.1	315.6	117.5	0.59	0.122	60.1	79.8	0.196	0.117	1.2
France	2011 Q3	133.5	149.6	0.281	27.2	434.4	317.1	117.3	0.594	0.131	57	79.8	0.207	0.124	1.3
France	2011 Q4	133.3	160.1	0.287	27.2	435.6	318.5	117.1	0.599	0.135	55.2	79.6	0.212	0.134	1.3
France	2012 Q1	135.5	166.8	0.294	26.9	436.7	319.9	116.8	0.605	0.137	54.9	79.3	0.214	0.145	1.4
France	2012 Q2	140	168.6	0.3	26.6	437.7	321.3	116.4	0.611	0.133	56.3	78.8	0.21	0.157	1.5
France	2012 Q3	146.5	165.8	0.307	26.2	438.7	322.6	116.1	0.618	0.128	58.9	78.2	0.204	0.17	1.6
France	2012 Q4	154.2	159.8	0.313	25.7	439.6	323.8	115.8	0.626	0.119	62.3	77.6	0.193	0.184	1.6
France	2013 Q1	162.4	152.8	0.319	25.2	440.5	325.1	115.4	0.633	0.11	66.1	76.9	0.182	0.197	1.7
France	2013 Q2	169.9	147.2	0.326	24.7	441.4	326.3	115.1	0.641	0.103	69.4	76.2	0.174	0.211	1.8
France	2013 Q3	176.1	145.1	0.332	24.3	442.3	327.5	114.8	0.648	0.097	71.8	75.6	0.166	0.224	1.8
France	2013 Q4	180.3	147.7	0.338	24	443.2	328.8	114.4	0.654	0.094	72.9	75.2	0.163	0.236	1.9
France	2014 Q1	182.1	155.1	0.345	23.8	444.2	330.1	114.1	0.66	0.096	72.4	74.9	0.165	0.247	2
France	2014 Q2	181.6	166.1	0.351	23.7	445.2	331.4	113.8	0.665	0.101	70.3	74.7	0.171	0.256	2
France	2014 Q3	179.2	178.9	0.358	23.8	446.3	332.8	113.5	0.669	0.112	67	74.8	0.184	0.263	2.1
France	2014 Q4	175.7	190.9	0.364	23.9	447.5	334.2	113.3	0.671	0.126	63	75	0.201	0.268	2.2
France	2015 Q1	171.9	199.9	0.37	24.2	448.8	335.8	113	0.672	0.143	58.8	75.4	0.222	0.271	2.3
France	2015 Q2	168.8	204.5	0.377	24.6	450.2	337.4	112.8	0.672	0.164	55	75.8	0.247	0.273	2.3
France	2015 Q3	167.3	204.2	0.383	25	451.7	339.1	112.6	0.671	0.185	52.3	76.3	0.272	0.273	2.4
France	2015 Q4	167.8	199.8	0.39	25.4	453.4	340.9	112.5	0.67	0.206	50.9	76.8	0.297	0.271	2.5
France	2016 Q1	170.7	193.1	0.396	25.7	455.2	342.8	112.4	0.667	0.226	51.2	77.2	0.321	0.267	2.5
France	2016 Q2	175.8	186.4	0.402	26	457.1	344.8	112.3	0.663	0.242	52.9	77.6	0.34	0.262	2.6
France	2016 Q3	182.7	182.1	0.409	26.1	459.2	346.9	112.3	0.659	0.256	55.8	77.8	0.357	0.257	2.7
France	2016 Q4	190.7	181.9	0.415	26.2	461.5	349.2	112.3	0.654	0.265	59.4	77.8	0.368	0.25	2.8
France	2017 Q1	198.7	186.7	0.422	26.1	463.9	351.6	112.3	0.65	0.27	63.1	77.6	0.374	0.244	2.8
France	2017 Q2	206	195.9	0.428	25.8	466.6	354.1	112.5	0.646	0.27	66.2	77.3	0.374	0.238	2.9
France	2017 Q3	211.6	207.9	0.434	25.5	469.4	356.8	112.6	0.642	0.267	68.3	76.8	0.37	0.233	3
France	2017 Q4	215.1	220.7	0.441	25.1	472.3	359.6	112.7	0.639	0.261	68.9	76.2	0.363	0.23	3
France	2018 Q1	216.2	231.6	0.447	24.6	475.5	362.5	113	0.637	0.252	67.9	75.5	0.352	0.227	3.1
France	2018 Q2	215.1	238.8	0.453	24.1	478.8	365.5	113.3	0.636	0.243	65.5	74.8	0.342	0.226	3.2
France	2018 Q3	212.3	241.3	0.46	23.6	482.2	368.7	113.5	0.636	0.236	61.9	74.2	0.333	0.227	3.3
France	2018 Q4	208.6	239	0.466	23.2	485.8	371.9	113.9	0.637	0.23	57.8	73.6	0.326	0.23	3.3
France	2019 Q1	205	233.3	0.473	22.9	489.6	375.3	114.3	0.639	0.229	53.6	73.1	0.325	0.235	3.4
France	2019 Q2	202.3	226.3	0.479	22.7	493.5	378.8	114.7	0.642	0.23	50.1	72.8	0.326	0.241	3.5
France	2019 Q3	201.3	220.4	0.485	22.6	497.5	382.4	115.1	0.647	0.235	47.7	72.7	0.332	0.25	3.5
France	2019 Q4	202.5	217.8	0.492	22.7	501.6	386	115.6	0.652	0.246	46.8	72.8	0.345	0.261	3.6
France	2020 Q1	206	219.7	0.498	22.9	505.8	389.7	116.1	0.658	0.26	47.5	73	0.362	0.272	3.7
France	2020 Q2	211.8	226.5	0.505	23.2	510.1	393.5	116.6	0.666	0.279	49.6	73.4	0.385	0.285	3.8
France	2020 Q3	219.1	237.2	0.511	23.5	514.5	397.4	117.1	0.673	0.299	52.8	73.8	0.409	0.298	3.8
France	2020 Q4	227.1	249.8	0.517	23.9	518.9	401.2	117.7	0.68	0.32	56.5	74.3	0.434	0.312	3.9
France	2021 Q1	235.1	262.1	0.524	24.3	523.4	405.1	118.3	0.688	0.341	60	74.8	0.459	0.326	4
France	2021 Q2	241.9	271.6	0.53	24.7	527.9	409.1	118.8	0.695	0.36	62.9	75.3	0.482	0.339	4
France	2021 Q3	246.9	276.8	0.536	24.9	532.3	413	119.3	0.702	0.377	64.6	75.6	0.502	0.351	4.1
France	2021 Q4	249.7	277.2	0.543	25.1	536.8	416.9	119.9	0.708	0.39	64.7	75.8	0.518	0.363	4.2
France	2022 Q1	250.2	273.2	0.549	25.1	541.2	420.8	120.4	0.713	0.399	63.3	75.8	0.529	0.372	4.3
France	2022 Q2	248.5	266.7	0.556	25	545.6	424.6	121	0.717	0.404	60.5	75.6	0.535	0.381	4.3
France	2022 Q3	245.4	259.8	0.562	24.8	550	428.4	121.6	0.72	0.404	56.7	75.2	0.535	0.387	4.4
France	2022 Q4	241.6	255.1	0.568	24.4	554.2	432.2	122	0.722	0.4	52.5	74.8	0.53	0.391	4.5
France	2023 Q1	238.1	254.4	0.575	24	558.4	435.9	122.5	0.723	0.394	48.5	74.1	0.523	0.393	4.5
France	2023 Q2	235.8	258.4	0.581	23.5	562.4	439.5	122.9	0.722	0.386	45.3	73.5	0.513	0.393	4.6
France	2023 Q3	235.4	267.1	0.588	23	566.4	443	123.4	0.721	0.378	43.3	72.8	0.504	0.392	4.7
France	2023 Q4	237.3	278.9	0.594	22.5	570.2	446.4	123.8	0.718	0.37	42.9	72.1	0.494	0.389	4.8
France	2024 Q1	241.6	291.7	0.6	22.1	573.8	449.7	124.1	0.715	0.364	44	71.6	0.487	0.384	4.8
France	2024 Q2	247.8	303	0.607	21.8	577.4	452.9	124.5	0.711	0.362	46.4	71.1	0.484	0.379	4.9
France	2024 Q3	255.4	310.8	0.613	21.6	580.7	456	124.7	0.706	0.364	49.8	70.8	0.487	0.373	5
France	2024 Q4	263.6	313.9	0.619	21.6	583.9	458.9	125	0.702	0.369	53.6	70.7	0.493	0.367	5
France	2025 Q1	271.3	312.2	0.626	21.6	586.9	461.8	125.1	0.698	0.381	57	70.8	0.507	0.361	5.1
France	2025 Q2	277.7	306.9	0.632	21.8	589.8	464.5	125.3	0.694	0.395	59.5	71	0.524	0.356	5.2
France	2025 Q3	282.1	299.9	0.639	22.1	592.5	467.1	125.4	0.691	0.414	60.8	71.4	0.547	0.351	5.3
France	2025 Q4	284.2	293.7	0.645	22.5	595	469.5	125.5	0.688	0.433	60.5	71.9	0.57	0.348	5.3
Italy	2005 Q1	104.5	86	0.165	26.7	391.4	267.8	123.6	0.591	0	74.9	79.5	0.05	0.099	0
Italy	2005 Q2	112.5	98.5	0.171	27.1	396.4	272.1	124.3	0.599	0	78.6	80	0.05	0.113	0
Italy	2005 Q3	119.6	108.6	0.178	27.4	401.3	276.5	124.8	0.606	0.006	81.6	80.5	0.057	0.126	0
Italy	2005 Q4	125	114.6	0.184	27.7	406.2	280.8	125.4	0.613	0.023	83.5	80.8	0.078	0.139	0
Italy	2006 Q1	128.2	115.8	0.191	27.9	411.1	285	126.1	0.619	0.038	83.9	81	0.096	0.15	0.1
Italy	2006 Q2	129	112.4	0.197	27.9	415.8	289.2	126.6	0.624	0.047	82.7	81	0.106	0.16	0.2
Italy	2006 Q3	127.6	106.2	0.203	27.8	420.5	293.4	127.1	0.629	0.052	80.1	80.9	0.112	0.168	0.2
Italy	2006 Q4	124.7	99.2	0.21	27.6	425.1	297.4	127.7	0.632	0.053	76.4	80.6	0.114	0.175	0.3
Italy	2007 Q1	121	94	0.216	27.3	429.6	301.4	128.2	0.634	0.05	72.3	80.1	0.11	0.18	0.4
Italy	2007 Q2	117.4	92.5	0.222	26.9	433.9	305.3	128.6	0.635	0.043	68.2	79.5	0.102	0.182	0.5
Italy	2007 Q3	114.8	95.7	0.229	26.4	438.1	309	129.1	0.635	0.036	64.8	78.8	0.093	0.183	0.5
Italy	2007 Q4	114.1	103.7	0.235	25.9	442.1	312.7	129.4	0.633	0.027	62.6	78.2	0.082	0.181	0.6
Italy	2008 Q1	115.6	115.1	0.242	25.4	446	316.2	129.8	0.631	0.02	61.9	77.5	0.074	0.179	0.7
Italy	2008 Q2	119.4	127.9	0.248	25	449.7	319.6	130.1	0.627	0.014	62.7	76.9	0.067	0.175	0.7
Italy	2008 Q3	125.4	139.6	0.254	24.7	453.2	322.8	130.4	0.624	0.01	65	76.4	0.062	0.169	0.8
Italy	2008 Q4	132.8	148.1	0.261	24.4	456.5	325.9	130.6	0.619	0.012	68.3	76.1	0.064	0.164	0.9
Italy	2009 Q1	140.9	152.1	0.267	24.4	459.6	328.9	130.7	0.615	0.017	72	76	0.07	0.157	1
Italy	2009 Q2	148.8	151.1	0.274	24.4	462.6	331.7	130.9	0.611	0.028	75.5	76	0.084	0.152	1
Italy	2009 Q3	155.4	146.3	0.28	24.6	465.3	334.4	130.9	0.607	0.041	78.2	76.3	0.099	0.146	1.1
Italy	2009 Q4	160.2	139.4	0.286	24.9	467.9	337	130.9	0.603	0.058	79.7	76.6	0.12	0.141	1.2
Italy	2010 Q1	162.7	133	0.293	25.2	470.3	339.4	130.9	0.601	0.079	79.7	77	0.145	0.138	1.2
Italy	2010 Q2	162.9	129.1	0.299	25.6	472.5	341.6	130.9	0.599	0.1	78.1	77.5	0.17	0.136	1.3
Italy	2010 Q3	161	129.6	0.305	26	474.5	343.8	130.7	0.598	0.121	75.1	78	0.195	0.135	1.4
Italy	2010 Q4	157.7	135	0.312	26.4	476.3	345.8	130.5	0.598	0.141	71.2	78.5	0.219	0.138	1.5
Italy	2011 Q1	153.9	144.7	0.318	26.6	478.1	347.7	130.4	0.6	0.158	67	78.8	0.24	0.141	1.5
Italy	2011 Q2	150.6	157	0.325	26.8	479.6	349.5	130.1	0.602	0.172	63.1	79	0.256	0.147	1.6
Italy	2011 Q3	148.5	169.6	0.331	26.8	481.1	351.2	129.9	0.606	0.181	60	79	0.267	0.154	1.7
Italy	2011 Q4	148.3	180.1	0.337	26.8	482.4	352.8	129.6	0.611	0.185	58.2	78.9	0.272	0.164	1.7
Italy	2012 Q1	150.5	186.8	0.344	26.5	483.6	354.3	129.3	0.617	0.187	57.9	78.5	0.274	0.175	1.8
Italy	2012 Q2	155	188.6	0.35	26.2	484.8	355.8	129	0.624	0.183	59.3	78.1	0.27	0.187	1.9
Italy	2012 Q3	161.5	185.8	0.357	25.8	485.8	357.2	128.6	0.631	0.178	61.9	77.5	0.264	0.2	2
Italy	2012 Q4	169.2	179.8	0.363	25.3	486.9	358.6	128.3	0.638	0.169	65.3	76.8	0.253	0.214	2
Italy	2013 Q1	177.4	172.8	0.369	24.8	487.9	360	127.9	0.646	0.16	69.1	76.1	0.242	0.227	2.1
Italy	2013 Q2	184.9	167.2	0.376	24.3	488.9	361.4	127.5	0.653	0.153	72.4	75.4	0.234	0.241	2.2
Italy	2013 Q3	191.1	165.1	0.382	23.9	489.9	362.8	127.1	0.66	0.147	74.8	74.9	0.226	0.254	2.2
Italy	2013 Q4	195.3	167.7	0.388	23.6	490.9	364.1	126.8	0.667	0.144	75.9	74.4	0.223	0.266	2.3
Italy	2014 Q1	197.1	175.1	0.395	23.4	492	365.6	126.4	0.673	0.146	75.4	74.1	0.225	0.277	2.4
Italy	2014 Q2	196.6	186.1	0.401	23.3	493.1	367	126.1	0.677	0.151	73.3	74	0.231	0.286	2.4
Italy	2014 Q3	194.2	198.9	0.408	23.4	494.3	368.6	125.7	0.681	0.162	70	74	0.244	0.293	2.5
Italy	2014 Q4	190.7	210.9	0.414	23.5	495.6	370.2	125.4	0.683	0.176	66	74.3	0.261	0.298	2.6
Italy	2015 Q1	186.9	219.9	0.42	23.8	497	371.9	125.1	0.685	0.193	61.8	74.6	0.282	0.301	2.7
Italy	2015 Q2	183.8	224.5	0.427	24.2	498.6	373.6	125	0.685	0.214	58	75.1	0.307	0.303	2.7
Italy	2015 Q3	182.3	224.2	0.433	24.6	500.3	375.5	124.8	0.684	0.235	55.3	75.6	0.332	0.303	2.8
Italy	2015 Q4	182.8	219.8	0.44	25	502.1	377.5	124.6	0.682	0.256	53.9	76.1	0.357	0.301	2.9
Italy	2016 Q1	185.7	213.1	0.446	25.3	504.1	379.6	124.5	0.679	0.276	54.2	76.5	0.381	0.297	2.9
Italy	2016 Q2	190.8	206.4	0.452	25.6	506.3	381.9	124.4	0.675	0.292	55.9	76.8	0.4	0.292	3
Italy	2016 Q3	197.7	202.1	0.459	25.7	508.6	384.2	124.4	0.671	0.306	58.8	77	0.417	0.287	3.1
Italy	2016 Q4	205.7	201.9	0.465	25.8	511.1	386.8	124.3	0.667	0.315	62.4	77	0.428	0.28	3.2
Italy	2017 Q1	213.7	206.7	0.472	25.7	513.8	389.4	124.4	0.663	0.32	66.1	76.9	0.434	0.274	3.2
Italy	2017 Q2	221	215.9	0.478	25.4	516.7	392.2	124.5	0.659	0.32	69.2	76.5	0.434	0.268	3.3
Italy	2017 Q3	226.6	227.9	0.484	25.1	519.8	395.1	124.7	0.655	0.317	71.3	76	0.43	0.263	3.4
Italy	2017 Q4	230.1	240.7	0.491	24.7	523.1	398.2	124.9	0.652	0.311	71.9	75.4	0.423	0.26	3.4
Italy	2018 Q1	231.2	251.6	0.497	24.2	526.6	401.5	125.1	0.649	0.302	70.9	74.8	0.412	0.257	3.5
Italy	2018 Q2	230.1	258.8	0.503	23.7	530.2	404.8	125.4	0.648	0.293	68.5	74.1	0.402	0.256	3.6
Italy	2018 Q3	227.3	261.3	0.51	23.2	534.1	408.3	125.8	0.648	0.286	64.9	73.4	0.393	0.257	3.7
Italy	2018 Q4	223.6	259	0.516	22.8	538.1	411.9	126.2	0.649	0.28	60.8	72.8	0.386	0.26	3.7
Italy	2019 Q1	220	253.3	0.523	22.5	542.2	415.7	126.5	0.651	0.279	56.6	72.4	0.385	0.265	3.8
Italy	2019 Q2	217.3	246.3	0.529	22.3	546.5	419.5	127	0.655	0.28	53.1	72.1	0.386	0.271	3.9
Italy	2019 Q3	216.3	240.4	0.535	22.2	551	423.5	127.5	0.659	0.285	50.7	72	0.392	0.28	3.9
Italy	2019 Q4	217.5	237.8	0.542	22.3	555.5	427.5	128	0.665	0.296	49.8	72	0.405	0.291	4
Italy	2020 Q1	221	239.7	0.548	22.5	560.2	431.6	128.6	0.671	0.31	50.5	72.3	0.422	0.302	4.1
Italy	2020 Q2	226.8	246.5	0.555	22.8	565	435.8	129.2	0.678	0.329	52.6	72.6	0.445	0.315	4.2
Italy	2020 Q3	234.1	257.2	0.561	23.1	569.8	440.1	129.7	0.685	0.349	55.8	73.1	0.469	0.328	4.2
Italy	2020 Q4	242.1	269.8	0.567	23.5	574.7	444.4	130.3	0.693	0.37	59.5	73.6	0.494	0.342	4.3
Italy	2021 Q1	250.1	282.1	0.574	23.9	579.7	448.7	131	0.7	0.391	63	74.1	0.519	0.356	4.4
Italy	2021 Q2	256.9	291.6	0.58	24.3	584.6	453	131.6	0.708	0.41	65.9	74.5	0.542	0.369	4.4
Italy	2021 Q3	261.9	296.8	0.586	24.5	589.6	457.4	132.2	0.714	0.427	67.6	74.8	0.562	0.381	4.5
Italy	2021 Q4	264.7	297.2	0.593	24.7	594.5	461.7	132.8	0.72	0.44	67.7	75	0.578	0.393	4.6
Italy	2022 Q1	265.2	293.2	0.599	24.7	599.4	466	133.4	0.726	0.449	66.3	75	0.589	0.402	4.7
Italy	2022 Q2	263.5	286.7	0.606	24.6	604.3	470.3	134	0.73	0.454	63.5	74.8	0.595	0.411	4.7
Italy	2022 Q3	260.4	279.8	0.612	24.4	609.1	474.5	134.6	0.733	0.454	59.7	74.5	0.595	0.417	4.8
Italy	2022 Q4	256.6	275.1	0.618	24	613.8	478.7	135.1	0.734	0.45	55.5	74	0.59	0.421	4.9
Italy	2023 Q1	253.1	274.4	0.625	23.6	618.4	482.7	135.7	0.735	0.444	51.5	73.4	0.583	0.423	4.9
Italy	2023 Q2	250.8	278.4	0.631	23.1	622.9	486.7	136.2	0.735	0.436	48.3	72.7	0.573	0.423	5
Italy	2023 Q3	250.4	287.1	0.638	22.6	627.3	490.6	136.7	0.733	0.428	46.3	72	0.564	0.422	5.1
Italy	2023 Q4	252.3	298.9	0.644	22.1	631.5	494.4	137.1	0.731	0.42	45.9	71.4	0.554	0.419	5.2
Italy	2024 Q1	256.6	311.7	0.65	21.7	635.5	498.1	137.4	0.727	0.414	47	70.8	0.547	0.414	5.2
Italy	2024 Q2	262.8	323	0.657	21.4	639.4	501.6	137.8	0.723	0.412	49.4	70.4	0.544	0.409	5.3
Italy	2024 Q3	270.4	330.8	0.663	21.2	643.2	505	138.2	0.719	0.414	52.8	70.1	0.547	0.403	5.4
Italy	2024 Q4	278.6	333.9	0.669	21.2	646.7	508.3	138.4	0.714	0.419	56.6	70	0.553	0.397	5.4
Italy	2025 Q1	286.3	332.2	0.676	21.2	650.1	511.4	138.7	0.71	0.431	60	70	0.567	0.391	5.5
Italy	2025 Q2	292.7	326.9	0.682	21.4	653.2	514.4	138.8	0.706	0.445	62.5	70.3	0.584	0.386	5.6
Italy	2025 Q3	297.1	319.9	0.689	21.7	656.2	517.3	138.9	0.703	0.464	63.8	70.6	0.607	0.381	5.7
Italy	2025 Q4	299.2	313.7	0.695	22.1	659	520	139	0.7	0.483	63.5	71.1	0.63	0.378	5.7
Spain	2005 Q1	112	96	0.19	26.5	410.4	280.8	129.6	0.598	0	76.4	79.2	0.05	0.114	0
Spain	2005 Q2	120	108.5	0.196	26.9	415.6	285.4	130.2	0.605	0.011	80.1	79.7	0.063	0.128	0.1
Spain	2005 Q3	127.1	118.6	0.203	27.2	420.8	289.9	130.9	0.612	0.031	83.1	80.1	0.087	0.141	0.2
Spain	2005 Q4	132.5	124.6	0.209	27.5	425.9	294.4	131.5	0.619	0.048	85	80.4	0.108	0.154	0.2
Spain	2006 Q1	135.7	125.8	0.216	27.7	431	298.9	132.1	0.626	0.063	85.4	80.6	0.126	0.165	0.3
Spain	2006 Q2	136.5	122.4	0.222	27.7	436	303.3	132.7	0.631	0.072	84.2	80.7	0.136	0.175	0.4
Spain	2006 Q3	135.1	116.2	0.228	27.6	440.9	307.6	133.3	0.635	0.077	81.6	80.5	0.142	0.183	0.4
Spain	2006 Q4	132.2	109.2	0.235	27.4	445.8	311.9	133.9	0.638	0.078	77.9	80.2	0.144	0.19	0.5
Spain	2007 Q1	128.5	104	0.241	27.1	450.4	316	134.4	0.64	0.075	73.8	79.7	0.14	0.195	0.6
Spain	2007 Q2	124.9	102.5	0.247	26.7	455	320.1	134.9	0.641	0.068	69.7	79.1	0.132	0.197	0.7
Spain	2007 Q3	122.3	105.7	0.254	26.2	459.4	324	135.4	0.641	0.061	66.3	78.5	0.123	0.198	0.7
Spain	2007 Q4	121.6	113.7	0.26	25.7	463.6	327.9	135.7	0.639	0.052	64.1	77.8	0.112	0.196	0.8
Spain	2008 Q1	123.1	125.1	0.267	25.2	467.6	331.5	136.1	0.637	0.045	63.4	77.1	0.104	0.194	0.9
Spain	2008 Q2	126.9	137.9	0.273	24.8	471.5	335.1	136.4	0.634	0.039	64.2	76.5	0.097	0.19	0.9
Spain	2008 Q3	132.9	149.6	0.279	24.5	475.2	338.5	136.7	0.63	0.035	66.5	76.1	0.092	0.184	1
Spain	2008 Q4	140.3	158.1	0.286	24.2	478.7	341.8	136.9	0.626	0.037	69.8	75.8	0.094	0.179	1.1
Spain	2009 Q1	148.4	162.1	0.292	24.2	482	344.9	137.1	0.621	0.042	73.5	75.6	0.1	0.172	1.2
Spain	2009 Q2	156.3	161.1	0.299	24.2	485	347.8	137.2	0.617	0.053	77	75.7	0.114	0.167	1.2
Spain	2009 Q3	162.9	156.3	0.305	24.4	487.9	350.7	137.2	0.613	0.066	79.7	75.9	0.129	0.161	1.3
Spain	2009 Q4	167.7	149.4	0.311	24.7	490.6	353.3	137.3	0.609	0.083	81.2	76.2	0.15	0.156	1.4
Spain	2010 Q1	170.2	143	0.318	25	493.1	355.8	137.3	0.607	0.104	81.2	76.7	0.175	0.153	1.4
Spain	2010 Q2	170.4	139.1	0.324	25.4	495.4	358.2	137.2	0.605	0.125	79.6	77.2	0.2	0.151	1.5
Spain	2010 Q3	168.5	139.6	0.33	25.8	497.5	360.5	137	0.604	0.146	76.6	77.7	0.225	0.15	1.6
Spain	2010 Q4	165.2	145	0.337	26.2	499.5	362.6	136.9	0.604	0.166	72.7	78.1	0.249	0.153	1.7
Spain	2011 Q1	161.4	154.7	0.343	26.4	501.3	364.6	136.7	0.606	0.183	68.5	78.4	0.27	0.156	1.7
Spain	2011 Q2	158.1	167	0.35	26.6	502.9	366.4	136.5	0.609	0.197	64.6	78.6	0.286	0.162	1.8
Spain	2011 Q3	156	179.6	0.356	26.6	504.4	368.2	136.2	0.612	0.206	61.5	78.7	0.297	0.169	1.9
Spain	2011 Q4	155.8	190.1	0.362	26.6	505.8	369.9	135.9	0.617	0.21	59.7	78.5	0.302	0.179	1.9
Spain	2012 Q1	158	196.8	0.369	26.3	507.1	371.5	135.6	0.623	0.212	59.4	78.2	0.304	0.19	2
Spain	2012 Q2	162.5	198.6	0.375	26	508.3	373.1	135.2	0.63	0.208	60.8	77.7	0.3	0.202	2.1
Spain	2012 Q3	169	195.8	0.382	25.6	509.4	374.6	134.8	0.637	0.203	63.4	77.1	0.294	0.215	2.2
Spain	2012 Q4	176.7	189.8	0.388	25.1	510.5	376.1	134.4	0.645	0.194	66.8	76.4	0.283	0.229	2.2
Spain	2013 Q1	184.9	182.8	0.394	24.6	511.6	377.5	134.1	0.652	0.185	70.6	75.7	0.272	0.242	2.3
Spain	2013 Q2	192.4	177.2	0.401	24.1	512.6	378.9	133.7	0.66	0.178	73.9	75.1	0.264	0.256	2.4
Spain	2013 Q3	198.6	175.1	0.407	23.7	513.7	380.4	133.3	0.667	0.172	76.3	74.5	0.256	0.269	2.4
Spain	2013 Q4	202.8	177.7	0.413	23.4	514.7	381.8	132.9	0.673	0.169	77.4	74	0.253	0.281	2.5
Spain	2014 Q1	204.6	185.1	0.42	23.2	515.9	383.3	132.6	0.679	0.171	76.9	73.7	0.255	0.292	2.6
Spain	2014 Q2	204.1	196.1	0.426	23.1	517	384.9	132.1	0.683	0.176	74.8	73.6	0.261	0.301	2.6
Spain	2014 Q3	201.7	208.9	0.433	23.2	518.3	386.5	131.8	0.687	0.187	71.5	73.7	0.274	0.308	2.7
Spain	2014 Q4	198.2	220.9	0.439	23.3	519.7	388.1	131.6	0.69	0.201	67.5	73.9	0.291	0.313	2.8
Spain	2015 Q1	194.4	229.9	0.445	23.6	521.2	389.9	131.3	0.691	0.218	63.3	74.3	0.312	0.316	2.9
Spain	2015 Q2	191.3	234.5	0.452	24	522.8	391.8	131	0.691	0.239	59.5	74.7	0.337	0.318	2.9
Spain	2015 Q3	189.8	234.2	0.458	24.4	524.6	393.7	130.9	0.69	0.26	56.8	75.2	0.362	0.318	3
Spain	2015 Q4	190.3	229.8	0.465	24.8	526.5	395.8	130.7	0.688	0.281	55.4	75.7	0.387	0.316	3.1
Spain	2016 Q1	193.2	223.1	0.471	25.1	528.6	398	130.6	0.685	0.301	55.7	76.1	0.411	0.312	3.1
Spain	2016 Q2	198.3	216.4	0.477	25.4	530.8	400.4	130.4	0.682	0.317	57.4	76.5	0.43	0.307	3.2
Spain	2016 Q3	205.2	212.1	0.484	25.5	533.3	402.9	130.4	0.678	0.331	60.3	76.6	0.447	0.302	3.3
Spain	2016 Q4	213.2	211.9	0.49	25.6	535.9	405.5	130.4	0.673	0.34	63.9	76.6	0.458	0.295	3.4
Spain	2017 Q1	221.2	216.7	0.497	25.5	538.8	408.3	130.5	0.669	0.345	67.6	76.5	0.464	0.289	3.4
Spain	2017 Q2	228.5	225.9	0.503	25.2	541.8	411.2	130.6	0.665	0.345	70.7	76.1	0.464	0.283	3.5
Spain	2017 Q3	234.1	237.9	0.509	24.9	545.1	414.3	130.8	0.661	0.342	72.8	75.7	0.46	0.278	3.6
Spain	2017 Q4	237.6	250.7	0.516	24.5	548.5	417.6	130.9	0.658	0.336	73.4	75.1	0.453	0.275	3.6
Spain	2018 Q1	238.7	261.6	0.522	24	552.2	420.9	131.3	0.656	0.327	72.4	74.4	0.442	0.272	3.7
Spain	2018 Q2	237.6	268.8	0.528	23.5	556	424.5	131.5	0.654	0.318	70	73.7	0.432	0.271	3.8
Spain	2018 Q3	234.8	271.3	0.535	23	560	428.1	131.9	0.654	0.311	66.4	73	0.423	0.272	3.9
Spain	2018 Q4	231.1	269	0.541	22.6	564.2	431.9	132.3	0.655	0.305	62.3	72.5	0.416	0.275	3.9
Spain	2019 Q1	227.5	263.3	0.548	22.3	568.6	435.9	132.7	0.658	0.304	58.1	72	0.415	0.28	4
Spain	2019 Q2	224.8	256.3	0.554	22.1	573.1	439.9	133.2	0.661	0.305	54.6	71.7	0.416	0.286	4.1
Spain	2019 Q3	223.8	250.4	0.56	22	577.7	444	133.7	0.665	0.31	52.2	71.6	0.422	0.295	4.1
Spain	2019 Q4	225	247.8	0.567	22.1	582.5	448.3	134.2	0.671	0.321	51.3	71.7	0.435	0.306	4.2
Spain	2020 Q1	228.5	249.7	0.573	22.3	587.4	452.6	134.8	0.677	0.335	52	71.9	0.452	0.317	4.3
Spain	2020 Q2	234.3	256.5	0.58	22.6	592.4	457	135.4	0.684	0.354	54.1	72.3	0.475	0.33	4.4
Spain	2020 Q3	241.6	267.2	0.586	22.9	597.5	461.5	136	0.692	0.374	57.3	72.7	0.499	0.343	4.4
Spain	2020 Q4	249.6	279.8	0.592	23.3	602.6	466	136.6	0.699	0.395	61	73.2	0.524	0.357	4.5
Spain	2021 Q1	257.6	292.1	0.599	23.7	607.8	470.5	137.3	0.707	0.416	64.5	73.7	0.549	0.371	4.6
Spain	2021 Q2	264.4	301.6	0.605	24.1	613	475	138	0.714	0.435	67.4	74.1	0.572	0.384	4.6
Spain	2021 Q3	269.4	306.8	0.611	24.3	618.2	479.6	138.6	0.721	0.452	69.1	74.5	0.592	0.396	4.7
Spain	2021 Q4	272.2	307.2	0.618	24.5	623.4	484.1	139.3	0.727	0.465	69.2	74.6	0.608	0.408	4.8
Spain	2022 Q1	272.7	303.2	0.624	24.5	628.5	488.6	139.9	0.732	0.474	67.8	74.6	0.619	0.417	4.9
Spain	2022 Q2	271	296.7	0.631	24.4	633.6	493.1	140.5	0.736	0.479	65	74.5	0.625	0.426	4.9
Spain	2022 Q3	267.9	289.8	0.637	24.2	638.7	497.5	141.2	0.739	0.479	61.2	74.1	0.625	0.432	5
Spain	2022 Q4	264.1	285.1	0.643	23.8	643.6	501.9	141.7	0.741	0.475	57	73.6	0.62	0.436	5.1
Spain	2023 Q1	260.6	284.4	0.65	23.4	648.4	506.2	142.2	0.741	0.469	53	73	0.613	0.438	5.1
Spain	2023 Q2	258.3	288.4	0.656	22.9	653.1	510.3	142.8	0.741	0.461	49.8	72.3	0.603	0.438	5.2
Spain	2023 Q3	257.9	297.1	0.663	22.4	657.7	514.4	143.3	0.739	0.453	47.8	71.6	0.594	0.437	5.3
Spain	2023 Q4	259.8	308.9	0.669	21.9	662.1	518.4	143.7	0.737	0.445	47.4	71	0.584	0.434	5.4
Spain	2024 Q1	264.1	321.7	0.675	21.5	666.4	522.2	144.2	0.733	0.439	48.5	70.4	0.577	0.429	5.4
Spain	2024 Q2	270.3	333	0.682	21.2	670.5	526	144.5	0.73	0.437	50.9	70	0.574	0.424	5.5
Spain	2024 Q3	277.9	340.8	0.688	21	674.4	529.5	144.9	0.725	0.439	54.3	69.7	0.577	0.418	5.6
Spain	2024 Q4	286.1	343.9	0.694	21	678.1	533	145.1	0.721	0.444	58.1	69.6	0.583	0.412	5.6
Spain	2025 Q1	293.8	342.2	0.701	21	681.6	536.3	145.3	0.717	0.456	61.5	69.7	0.597	0.406	5.7
Spain	2025 Q2	300.2	336.9	0.707	21.2	684.9	539.4	145.5	0.713	0.47	64	69.9	0.614	0.401	5.8
Spain	2025 Q3	304.6	329.9	0.714	21.5	688.1	542.4	145.7	0.709	0.489	65.3	70.3	0.637	0.396	5.9
Spain	2025 Q4	306.7	323.7	0.72	21.9	691	545.2	145.8	0.707	0.508	65	70.7	0.66	0.393	5.9

## Sheet: Panel C
Country/Region	Quarter	Real GDP Growth (%, QoQ)	Inflation (CPI, %)	Unemployment Rate (%)	Current Acct (% GDP)	VIX Index	EUR/USD Exch. Rate	Policy Rate (%)	M2 Growth (%)	Industrial Prod. (%, YoY)	PMI Manufact.
United States	2005 Q1	0.5	3	8.4	-1.1	12	1.2	2	4.7	5.3	44.1
United States	2005 Q2	0.6	3.1	7.9	-1.2	13	1.23	2.05	7.5	1.5	49.4
United States	2005 Q3	0.8	3.4	7.5	-1.7	14	1.25	2.1	6.7	4.3	47.7
United States	2005 Q4	0.4	3.5	7	-0.8	13	1.26	2.15	7	3.4	53.2
United States	2006 Q1	0.7	3.3	7	-2.2	13	1.28	2.2	7.5	0.4	51.5
United States	2006 Q2	0.8	3.8	7.6	-1.7	12	1.26	2.25	6	2	45.7
United States	2006 Q3	0.7	4	6.9	-1.7	11	1.27	2.3	6.3	2.5	55.3
United States	2006 Q4	0.5	3.8	6.8	-1.1	13	1.32	2.35	5.4	1.9	52.3
United States	2007 Q1	0.8	2.6	7.4	-1.8	25	1.46	2.4	7.9	-0.9	50.2
United States	2007 Q2	0.6	2.3	7.4	-1.7	55	1.55	2.45	2.3	1.7	53.5
United States	2007 Q3	0.4	1.8	6.9	-1.2	28	1.48	2.5	5.4	0.7	48.9
United States	2007 Q4	0.5	1.9	7.7	-1.2	22	1.43	2.55	5.8	0.2	49.5
United States	2008 Q1	0.3	-0.4	7.1	-1.2	17	1.39	2.6	4.8	1.8	48.6
United States	2008 Q2	-0.7	0.2	7.6	-1.7	18	1.35	2.65	6.9	-0.9	50.7
United States	2008 Q3	-1.2	1.5	7.3	-1.5	18	1.31	2.7	3.8	3.4	48.9
United States	2008 Q4	0.6	2	6.9	-1.7	20	1.43	2.75	10.4	2.3	50.8
United States	2009 Q1	1.8	2	6.7	-1.6	22	1.38	2.8	4.6	0.6	53.5
United States	2009 Q2	0.6	2.3	7.9	-1.7	19	1.37	2.85	7.4	6.6	42.5
United States	2009 Q3	0.5	2.8	7.7	-2.5	18	1.3	2.9	6.7	-2.5	47.1
United States	2009 Q4	0.3	2.8	6.2	-1.2	19	1.26	2.95	5.2	-0.8	44.5
United States	2010 Q1	0.7	2.9	7.4	-1.8	20	1.33	3	3.6	-3.8	45.5
United States	2010 Q2	0.6	3.4	7.4	-0.9	22	1.45	3.05	7	3	48.2
United States	2010 Q3	0.8	3.4	7.8	-1.5	25	1.43	3.1	3.1	-0.5	53
United States	2010 Q4	0.7	2.9	7.8	-1.7	23	1.38	3.15	3	1.1	60.1
United States	2011 Q1	0.5	1.7	7.2	-2	19	1.25	3.2	6.4	0.1	46.8
United States	2011 Q2	0.6	1.8	7.3	-2	14	1.21	3.25	3.9	-2.4	52.9
United States	2011 Q3	0.8	2	7.1	-2.1	13	1.23	3.3	4.5	0.8	50.9
United States	2011 Q4	0.9	2	7.6	-0.5	14	1.29	3.35	4.1	-1.3	55.7
United States	2012 Q1	0.8	2.2	7.4	-0.9	15	1.34	3.4	4.2	0.6	50.1
United States	2012 Q2	0.7	2.3	7.5	-1.5	13	1.38	3.45	6.2	1.5	56.2
United States	2012 Q3	0.6	2	6.8	-1.5	12	1.36	0.1	7	-0.3	52.8
United States	2012 Q4	0.5	1.8	7.2	-2.2	12	1.3	0.14	8.8	0	46.1
United States	2013 Q1	0.7	1.5	7.2	-1.6	12	1.2	0.18	4.7	-2.5	51.1
United States	2013 Q2	0.5	1.3	7	-1.7	11	1.13	0.22	7.7	2.8	46.1
United States	2013 Q3	0.6	1.3	7	-2.1	12	1.08	0.26	6.2	1.1	57.1
United States	2013 Q4	0.7	1.5	6.8	-0.9	13	1.06	0.3	5.3	2.8	57.5
United States	2014 Q1	0.8	1.3	7.1	-0.8	14	1.09	0.34	3.5	2.4	50.8
United States	2014 Q2	0.5	0.7	6.8	-1.5	14	1.13	0.38	5.4	0.8	58.1
United States	2014 Q3	0.6	-0.1	6.7	-1	21	1.12	0.42	3.6	-3.1	52.1
United States	2014 Q4	0.8	0	6.7	-1.8	20	1.07	0.46	4.1	3.2	51.1
United States	2015 Q1	0.6	1.3	7.3	-1.5	18	1.07	0.5	6.1	1.2	52.2
United States	2015 Q2	0.7	2.1	6.8	-0.7	15	1.12	0.54	8.1	0.2	47.6
United States	2015 Q3	0.5	2.4	6.9	-1.2	14	1.18	0.58	4.9	1.3	52
United States	2015 Q4	0.6	1.8	7	-1.5	13	1.21	0.62	6.1	-2.4	48.8
United States	2016 Q1	0.7	2.1	7.8	-1.5	12	1.13	0.66	4.1	1.2	53.3
United States	2016 Q2	0.8	2.2	7.1	-1.9	11	1.08	0.7	3.2	2.8	52.8
United States	2016 Q3	0.6	2	7	-1.5	12	1.1	0.74	4.3	-2.8	49.9
United States	2016 Q4	0.5	2.3	6.9	-2.1	14	1.12	0.78	4.7	-1.6	45.8
United States	2017 Q1	0.7	1.8	6.7	-0.7	16	1.17	0.82	6.3	0.9	53.5
United States	2017 Q2	0.6	1.8	6.7	-2	19	1.19	0.86	6.1	0.7	52.1
United States	2017 Q3	0.5	1.2	7	-1.4	27	1.14	0.9	6	1.2	57.2
United States	2017 Q4	-1.5	1.2	7.8	-1.6	30	1.06	0.94	5	3.1	45
United States	2018 Q1	1.2	0.2	6.8	-1.7	36	1.09	0.98	6.2	1	48.2
United States	2018 Q2	1.6	0.1	7.2	-1.5	28	1.22	1.02	3.1	1.4	50.7
United States	2018 Q3	1.4	0.9	6.8	-1.6	18	1.2	1.06	5	0	56
United States	2018 Q4	1.2	1.7	7.3	-1.9	17	1.18	1.1	3.2	0.1	50.1
United States	2019 Q1	0.8	3.9	7.2	-1.4	16	1.07	1.14	5	-0.2	46.7
United States	2019 Q2	0.6	5	7.1	-1	22	1.05	1.18	5.5	6.8	50
United States	2019 Q3	0.7	7.5	6.7	-1.8	28	1.07	1.22	4.9	0.6	45.2
United States	2019 Q4	0.8	8	7	-1.6	30	1.09	1.26	3.8	0.9	47.1
United States	2020 Q1	0.7	8.5	7.7	-1.2	29	1.07	1.3	4.2	-1.8	54.4
United States	2020 Q2	0.5	7.7	7	-2.3	27	1.06	1.34	6.1	2.2	48.2
United States	2020 Q3	0.6	6.5	6.8	-2	26	1.05	1.38	5.9	1.3	55.1
United States	2020 Q4	0.7	4.1	7	-1	23	1.1	1.42	5.8	1.2	45.9
United States	2021 Q1	0.6	3.4	6.9	-2.4	22	1.12	1.46	3.4	-2.6	57.8
United States	2021 Q2	0.5	3.2	6.5	-1.5	20	1.07	1.5	6	3.6	52
United States	2021 Q3	0.7	3	7	-1	19	1.07	1.54	7.8	-0.9	54.2
United States	2021 Q4	0.8	2.6	6.3	-1.1	18	1.1	1.58	5.6	5.4	49.8
United States	2022 Q1	0.6	2.3	6.9	-1	17	1.08	1.62	5	0.6	54.3
United States	2022 Q2	0.5	2.1	7.9	-1.4	16	1.07	1.66	3.6	1.2	48.1
United States	2022 Q3	0.7	2	6.4	-1.4	18	1.06	1.7	3.9	1.5	58.2
United States	2022 Q4	0.8	1.8	6.2	-1.6	20	1.07	1.74	6.1	5.6	54
United States	2023 Q1	0.7	2	6.6	-2	19	1.08	1.78	4.4	1.9	48.3
United States	2023 Q2	0.6	2.1	7.1	-0.9	18	1.09	1.82	5.6	1	49.8
United States	2023 Q3	0.5	2.3	6.7	-1.4	17	1.1	1.86	5.6	0.3	51.7
United States	2023 Q4	0.6	2.4	6.6	-0.9	16	1.1	1.9	8.3	0.8	52.5
United States	2024 Q1	0.7	2.5	6.6	-2	17	1.09	1.94	4.5	-2.4	51.4
United States	2024 Q2	0.8	2.6	6.5	-2.5	18	1.09	1.98	3	5	53.4
United States	2024 Q3	0.7	2.7	7.3	-1.6	18	1.1	2.02	6.7	2	54
United States	2024 Q4	0.6	2.8	7.2	-1.3	17	1.11	2.06	5	0.7	44.1
United States	2025 Q1	0.5	1.3	6.2	-1	18	1.1	2.1	5.3	3.6	51.8
United States	2025 Q2	0.6	1.8	7.1	-1.2	18	1.1	2.14	5.1	2.2	47.2
United States	2025 Q3	0.7	1.3	7.1	-1.3	18	1.1	2.18	7.4	-0.9	52.4
United States	2025 Q4	0.8	2.1	6.6	-2.2	18	1.1	2.22	8.1	1.7	49.1
Euro Area (Agg.)	2005 Q1	0.4	2.2	7.8	0.4	12	1.2	2	3.5	1.3	51.3
Euro Area (Agg.)	2005 Q2	0.5	2.3	7.3	0.4	13	1.23	2.05	5.9	0.3	58.2
Euro Area (Agg.)	2005 Q3	0.7	2.5	7.3	0	14	1.25	2.1	8.7	-0.9	47.8
Euro Area (Agg.)	2005 Q4	0.3	2.3	7.6	1.1	13	1.26	2.15	6.7	3.3	44
Euro Area (Agg.)	2006 Q1	0.7	2.2	7.5	1.1	13	1.28	2.2	6.1	1.6	46.9
Euro Area (Agg.)	2006 Q2	0.8	2.5	7.2	1	12	1.26	2.25	3.2	5.4	54.1
Euro Area (Agg.)	2006 Q3	0.6	2.5	7.7	1.5	11	1.27	2.3	4.3	0.3	51.5
Euro Area (Agg.)	2006 Q4	0.4	2.3	7	0.6	13	1.32	2.35	6.4	3.7	50.3
Euro Area (Agg.)	2007 Q1	0.7	1.8	7.5	0.4	25	1.46	2.4	5.1	2.1	48
Euro Area (Agg.)	2007 Q2	0.5	1.5	6.3	0.6	55	1.55	2.45	8	4.2	55.7
Euro Area (Agg.)	2007 Q3	0.3	0.3	7.4	1.4	28	1.48	2.5	6.8	2.5	57.4
Euro Area (Agg.)	2007 Q4	0.4	0.3	7.4	1.5	22	1.43	2.55	6.2	-1.6	47.2
Euro Area (Agg.)	2008 Q1	-0.5	0.3	7.5	1.4	17	1.39	2.6	7.1	2.3	55.9
Euro Area (Agg.)	2008 Q2	-1.5	0.8	7.3	1.6	18	1.35	2.65	5	4.6	54.8
Euro Area (Agg.)	2008 Q3	-0.5	1.5	7.2	0.5	18	1.31	2.7	5.8	0.7	57
Euro Area (Agg.)	2008 Q4	0.4	1.9	7.6	1.7	20	1.43	2.75	5.2	-0.3	42.5
Euro Area (Agg.)	2009 Q1	0.4	1.6	7.5	1.2	22	1.38	2.8	6.7	2.4	53.3
Euro Area (Agg.)	2009 Q2	0.3	1.8	7.6	0.2	19	1.37	2.85	5.4	6.4	49.2
Euro Area (Agg.)	2009 Q3	0.4	2	7.4	1.1	18	1.3	2.9	6.8	-0.3	54.9
Euro Area (Agg.)	2009 Q4	0.3	1.6	7.4	1.3	19	1.26	2.95	4.8	4	52.9
Euro Area (Agg.)	2010 Q1	0.3	2.8	7.1	1.1	20	1.33	3	3.1	-1.5	51.4
Euro Area (Agg.)	2010 Q2	0.2	3	7.4	0.5	22	1.45	3.05	5.3	3	47.5
Euro Area (Agg.)	2010 Q3	0.1	3	7.1	0.2	25	1.43	3.1	5.7	6.7	41.6
Euro Area (Agg.)	2010 Q4	-0.1	2.8	7.4	1	23	1.38	3.15	5.3	0.3	54.7
Euro Area (Agg.)	2011 Q1	-0.3	2.2	7.1	0.6	19	1.25	3.2	7.1	3.5	52.5
Euro Area (Agg.)	2011 Q2	-0.5	1.7	6.9	0.9	14	1.21	3.25	2.6	1.9	51.4
Euro Area (Agg.)	2011 Q3	-0.4	1.5	8.5	1.3	13	1.23	3.3	5.5	2.4	51.4
Euro Area (Agg.)	2011 Q4	-0.2	1.2	7.3	1	14	1.29	3.35	4.2	1.4	53.7
Euro Area (Agg.)	2012 Q1	0.3	0.8	7.3	0.6	15	1.34	3.4	6.5	-1.4	48
Euro Area (Agg.)	2012 Q2	0.4	0.6	7.7	1.3	13	1.38	3.45	3.9	3.8	46.7
Euro Area (Agg.)	2012 Q3	0.5	0.4	6.9	0.7	12	1.36	0.1	4.2	2.4	52.9
Euro Area (Agg.)	2012 Q4	0.6	0.3	7.3	1.4	12	1.3	0.14	5.4	1.7	52.3
Euro Area (Agg.)	2013 Q1	0.5	0.1	7.1	2.1	12	1.2	0.18	5.8	2.1	49.6
Euro Area (Agg.)	2013 Q2	0.4	-0.2	7.5	1	11	1.13	0.22	5.9	-0.6	41.6
Euro Area (Agg.)	2013 Q3	0.4	0.1	7.1	1.2	12	1.08	0.26	2.6	3.5	52.4
Euro Area (Agg.)	2013 Q4	0.5	0.2	7.1	1.8	13	1.06	0.3	6.5	3.8	56.9
Euro Area (Agg.)	2014 Q1	0.5	0.8	6.8	0.6	14	1.09	0.34	6.2	-3.4	50.9
Euro Area (Agg.)	2014 Q2	0.5	1.3	7	2.2	14	1.13	0.38	4.9	1.9	53.6
Euro Area (Agg.)	2014 Q3	0.4	0.6	7.4	0.8	21	1.12	0.42	6.2	7.8	46.4
Euro Area (Agg.)	2014 Q4	0.5	0.1	7.8	1.1	20	1.07	0.46	3.7	-0.7	55.2
Euro Area (Agg.)	2015 Q1	0.6	0.5	7.4	1.2	18	1.07	0.5	4.5	4.4	54.9
Euro Area (Agg.)	2015 Q2	0.5	1.3	7	1.3	15	1.12	0.54	7.4	1.6	58.5
Euro Area (Agg.)	2015 Q3	0.4	1.8	7.5	1	14	1.18	0.58	2.8	1.1	55.1
Euro Area (Agg.)	2015 Q4	0.5	1.5	7.3	1.1	13	1.21	0.62	4.9	6	56.2
Euro Area (Agg.)	2016 Q1	0.4	1.6	7.2	1.9	12	1.13	0.66	5.9	-0.1	52.5
Euro Area (Agg.)	2016 Q2	0.4	1.7	7	1.2	11	1.08	0.7	4.9	-1.4	46.6
Euro Area (Agg.)	2016 Q3	0.5	1.5	7	0.7	12	1.1	0.74	6.1	1.3	57.4
Euro Area (Agg.)	2016 Q4	0.5	1.4	7.1	0.7	14	1.12	0.78	6	0.8	54.1
Euro Area (Agg.)	2017 Q1	0.5	1	6.7	0.5	16	1.17	0.82	6	3.9	55.1
Euro Area (Agg.)	2017 Q2	0.4	0.8	7.2	1.6	19	1.19	0.86	3.4	-1	57.9
Euro Area (Agg.)	2017 Q3	0.3	0.9	7.1	1.2	27	1.14	0.9	5.7	1.5	48.8
Euro Area (Agg.)	2017 Q4	-1.2	0.8	6.9	1.7	30	1.06	0.94	8.1	5.6	51.5
Euro Area (Agg.)	2018 Q1	1	0.2	7.2	0.8	36	1.09	0.98	7.6	2.7	53.6
Euro Area (Agg.)	2018 Q2	1.4	0.2	6.8	0.2	28	1.22	1.02	6.5	0.1	52.7
Euro Area (Agg.)	2018 Q3	1.6	0.9	6.7	0.9	18	1.2	1.06	4.4	1.4	50.2
Euro Area (Agg.)	2018 Q4	1.3	2.1	7.2	1.4	17	1.18	1.1	5.8	0.3	46.8
Euro Area (Agg.)	2019 Q1	0.7	2.9	7.5	0.8	16	1.07	1.14	3.8	2	48.6
Euro Area (Agg.)	2019 Q2	0.4	4.9	6.6	1.9	22	1.05	1.18	6.4	4.1	46.6
Euro Area (Agg.)	2019 Q3	0.5	7.4	7	0.6	28	1.07	1.22	7.3	1.6	45.4
Euro Area (Agg.)	2019 Q4	0.6	8.9	7	0	30	1.09	1.26	6.7	6.5	44.9
Euro Area (Agg.)	2020 Q1	0.6	9.9	6.9	1.6	29	1.07	1.3	5.4	1	46.8
Euro Area (Agg.)	2020 Q2	0.5	9.2	6.9	0	27	1.06	1.34	5	4.6	47.3
Euro Area (Agg.)	2020 Q3	0.4	7.1	6.6	1.3	26	1.05	1.38	3.9	1.9	42.5
Euro Area (Agg.)	2020 Q4	0.4	5	7.4	0.7	23	1.1	1.42	6.1	4	44.4
Euro Area (Agg.)	2021 Q1	0.4	3.4	6.4	0.9	22	1.12	1.46	7.1	6.5	51
Euro Area (Agg.)	2021 Q2	0.3	2.8	6.9	1.3	20	1.07	1.5	4.5	1.3	54.2
Euro Area (Agg.)	2021 Q3	0.4	2.5	6.3	1.3	19	1.07	1.54	7.5	-1.2	47
Euro Area (Agg.)	2021 Q4	0.5	2.3	7.3	1.7	18	1.1	1.58	3	3.6	54.5
Euro Area (Agg.)	2022 Q1	0.4	2	6.6	1.3	17	1.08	1.62	5.6	4.3	48
Euro Area (Agg.)	2022 Q2	0.3	1.9	6.9	0.3	16	1.07	1.66	7.7	2.4	50.5
Euro Area (Agg.)	2022 Q3	0.4	1.8	6.4	1.4	18	1.06	1.7	6.1	2.6	50.1
Euro Area (Agg.)	2022 Q4	0.5	1.8	6.9	0.7	20	1.07	1.74	2.7	0.6	48.8
Euro Area (Agg.)	2023 Q1	0.4	1.8	6.5	1.8	19	1.08	1.78	5.2	2.3	48.9
Euro Area (Agg.)	2023 Q2	0.3	2	6.7	1.1	18	1.09	1.82	6	2.5	43.7
Euro Area (Agg.)	2023 Q3	0.2	2.1	7.2	1.7	17	1.1	1.86	6.4	-1.5	42.3
Euro Area (Agg.)	2023 Q4	0.3	2.2	6.2	1.6	16	1.1	1.9	3.2	7.4	44.5
Euro Area (Agg.)	2024 Q1	0.4	2.1	6.2	1	17	1.09	1.94	3.2	0.8	53.5
Euro Area (Agg.)	2024 Q2	0.5	2.1	7.2	1.1	18	1.09	1.98	3.5	1	50.3
Euro Area (Agg.)	2024 Q3	0.4	2.2	6.3	0.6	18	1.1	2.02	5.3	-2.1	47.4
Euro Area (Agg.)	2024 Q4	0.3	2	6.2	0.7	17	1.11	2.06	4.6	-0.5	54.2
Euro Area (Agg.)	2025 Q1	0.4	2.6	6.5	1.2	18	1.1	2.1	5.1	3	59.7
Euro Area (Agg.)	2025 Q2	0.5	2.1	7.3	0.9	18	1.1	2.14	8.7	2.1	56.2
Euro Area (Agg.)	2025 Q3	0.4	1.6	7.1	2.2	18	1.1	2.18	5.7	1.7	53.3
Euro Area (Agg.)	2025 Q4	0.3	2.3	7.2	1.3	18	1.1	2.22	4.1	1.3	48.9
Germany	2005 Q1	-0.3	0.6	7.3	1.3	12	1.2	2	4.8	1.1	53.6
Germany	2005 Q2	0.08	0.6	7	0.4	13	1.23	2.05	5.2	0.8	52.4
Germany	2005 Q3	0.57	2.8	7.7	0.9	14	1.25	2.1	2.8	4	56.3
Germany	2005 Q4	-0.1	2.1	8.4	1.5	13	1.26	2.15	6	-0.3	52.7
Germany	2006 Q1	0.57	2.3	7.2	1.3	13	1.28	2.2	6.3	-1.6	52
Germany	2006 Q2	1.04	2.5	7.6	1.7	12	1.26	2.25	6.2	2.7	47.3
Germany	2006 Q3	0.38	2.2	7.8	0.6	11	1.27	2.3	4.4	-0.1	51.4
Germany	2006 Q4	1.11	1.4	8.5	0.3	13	1.32	2.35	3	3.7	45.2
Germany	2007 Q1	0.38	2.2	7.8	2	25	1.46	2.4	5	4.6	48.1
Germany	2007 Q2	0.24	0.9	6.8	0.2	55	1.55	2.45	7	5.3	49.6
Germany	2007 Q3	0.28	0.9	7.6	1.6	28	1.48	2.5	6.1	0.9	51.6
Germany	2007 Q4	0.88	0.7	7.3	1.4	22	1.43	2.55	6.7	0.2	45.6
Germany	2008 Q1	0.22	0.8	7.1	0.5	17	1.39	2.6	4.8	0.5	50.1
Germany	2008 Q2	0.13	1.7	7.2	1.1	18	1.35	2.65	4.8	4.1	48.4
Germany	2008 Q3	0.58	1.7	7	1.3	18	1.31	2.7	5.8	1.5	55.9
Germany	2008 Q4	0.38	1.9	7.5	1.5	20	1.43	2.75	4.6	0.5	55.2
Germany	2009 Q1	0.36	2.4	7.8	1.9	22	1.38	2.8	7.6	-0.6	50.2
Germany	2009 Q2	-0.04	0.5	7.8	1.2	19	1.37	2.85	4.1	0.3	53.7
Germany	2009 Q3	0.47	2.5	7.9	1.2	18	1.3	2.9	6	-0.6	53.3
Germany	2009 Q4	-0.31	1.6	7	1	19	1.26	2.95	6.4	-1.4	54.6
Germany	2010 Q1	-0.09	0.5	6.8	1.6	20	1.33	3	5	-2.7	50.4
Germany	2010 Q2	0.61	3.1	7.4	0.1	22	1.45	3.05	8.2	3.9	46.6
Germany	2010 Q3	1.27	1.8	8.2	-0.2	25	1.43	3.1	4.5	3.3	50.6
Germany	2010 Q4	0.03	1	7.6	1.2	23	1.38	3.15	6.7	0.5	52.6
Germany	2011 Q1	0.2	2.6	6.6	1.9	19	1.25	3.2	4.6	4.2	51
Germany	2011 Q2	0.05	0.8	7.6	1.3	14	1.21	3.25	6.5	1	44.4
Germany	2011 Q3	0.07	0.9	6.9	1.1	13	1.23	3.3	5.2	-0.2	45
Germany	2011 Q4	0.78	2.6	7.1	0.5	14	1.29	3.35	6.6	0.8	41.6
Germany	2012 Q1	0.4	1.6	7.6	1	15	1.34	3.4	4	0.4	49.2
Germany	2012 Q2	0.24	1.3	6.3	1.6	13	1.38	3.45	7.1	5.3	51.1
Germany	2012 Q3	0.41	3.3	7.7	1.2	12	1.36	0.1	6.7	1	56.1
Germany	2012 Q4	0.67	2.5	6.8	1.1	12	1.3	0.14	6.3	3	52.5
Germany	2013 Q1	0.55	2.6	8.3	1.7	12	1.2	0.18	6.8	3	52
Germany	2013 Q2	0.57	2.3	8	0.5	11	1.13	0.22	7.5	-0.5	52.6
Germany	2013 Q3	0.19	0.8	6.3	0.8	12	1.08	0.26	6.7	-0.8	54.7
Germany	2013 Q4	0.88	1.7	6.6	1.5	13	1.06	0.3	3.8	5.2	53.7
Germany	2014 Q1	0.14	1.1	7.1	1.2	14	1.09	0.34	6.6	-1	45.6
Germany	2014 Q2	0.58	0.1	6.5	1.6	14	1.13	0.38	6.4	-2.1	49.2
Germany	2014 Q3	0.58	2.8	7.4	1.2	21	1.12	0.42	4.1	2.3	54.2
Germany	2014 Q4	0.54	1.7	7	1.4	20	1.07	0.46	6.3	-0.4	57.9
Germany	2015 Q1	0.86	1.6	6.6	0.5	18	1.07	0.5	4.2	4.8	53.6
Germany	2015 Q2	0.72	3.5	7.4	0.8	15	1.12	0.54	2.7	3.4	48.4
Germany	2015 Q3	1.32	1	7.1	1.7	14	1.18	0.58	6.7	-4.1	57.2
Germany	2015 Q4	0.7	2.3	7.3	0.5	13	1.21	0.62	4.7	-1.3	49.8
Germany	2016 Q1	0.21	1.4	6.9	0.1	12	1.13	0.66	4.7	-0.4	51.3
Germany	2016 Q2	-0.16	2.7	7.2	0.7	11	1.08	0.7	4.6	4	45.3
Germany	2016 Q3	0.76	2.3	7.1	1.1	12	1.1	0.74	4.8	0	52.9
Germany	2016 Q4	0.43	2.3	7.9	0.4	14	1.12	0.78	7	4.5	49.4
Germany	2017 Q1	0.19	1.1	7.2	0.9	16	1.17	0.82	3.4	4	42.4
Germany	2017 Q2	0.09	1.7	7.1	0.6	19	1.19	0.86	6.8	3.4	52.7
Germany	2017 Q3	0.81	1.7	7	0.9	27	1.14	0.9	5	-1.6	49
Germany	2017 Q4	0.05	1.6	7.1	1.5	30	1.06	0.94	9.4	3	51.3
Germany	2018 Q1	0.56	0.3	7.1	1.5	36	1.09	0.98	7.8	-2.1	55
Germany	2018 Q2	0.42	2.8	6.2	0.5	28	1.22	1.02	6.7	4.3	49.4
Germany	2018 Q3	0.4	1.9	6.8	0.8	18	1.2	1.06	4	2.4	38.5
Germany	2018 Q4	0.24	1.2	7.3	1.7	17	1.18	1.1	2.3	3.5	57.1
Germany	2019 Q1	0.55	1.5	7.1	1	16	1.07	1.14	3.8	2.7	54.8
Germany	2019 Q2	-0.01	0	7.3	1.3	22	1.05	1.18	4.5	0.7	55.1
Germany	2019 Q3	0.27	2.5	6.8	1.6	28	1.07	1.22	6.9	4.6	47.4
Germany	2019 Q4	0.55	1.9	6.8	1.5	30	1.09	1.26	6.2	2	52
Germany	2020 Q1	0.12	1.7	6.7	0.6	29	1.07	1.3	6.9	-3.8	51
Germany	2020 Q2	0.66	1.7	6.6	0.9	27	1.06	1.34	3.3	-0.9	50.1
Germany	2020 Q3	1.1	0.4	6.6	1	26	1.05	1.38	5.3	3.2	56.5
Germany	2020 Q4	-0.1	2.4	6	0.9	23	1.1	1.42	4.5	-2.9	44.1
Germany	2021 Q1	0.12	2.7	7.3	1.9	22	1.12	1.46	6.6	4.8	54.1
Germany	2021 Q2	0.19	1.8	6.5	1.1	20	1.07	1.5	5	2.9	53.9
Germany	2021 Q3	0.07	3	6.8	1.1	19	1.07	1.54	4.9	4.7	51.6
Germany	2021 Q4	0.49	2.9	7.4	0.9	18	1.1	1.58	7.9	1.6	56.1
Germany	2022 Q1	0.48	0.6	6.5	0.4	17	1.08	1.62	5.1	-0.7	52.5
Germany	2022 Q2	1.05	0.7	6.9	1.2	16	1.07	1.66	7.3	2.2	45.8
Germany	2022 Q3	-0.07	1.2	6.7	0.8	18	1.06	1.7	4.5	0.5	47.2
Germany	2022 Q4	0.61	2.5	7.4	0.7	20	1.07	1.74	5.8	1.3	54.1
Germany	2023 Q1	0.97	1	6.7	0.9	19	1.08	1.78	7.1	3.6	48.3
Germany	2023 Q2	0.38	2.1	7	1.7	18	1.09	1.82	4.7	-0.5	48.3
Germany	2023 Q3	0.4	2.5	7.3	0.5	17	1.1	1.86	6.9	1.8	52.4
Germany	2023 Q4	0.3	2.1	6.9	1.3	16	1.1	1.9	4.3	0.6	53.1
Germany	2024 Q1	0.4	0.9	6.5	1.3	17	1.09	1.94	6.5	5.1	54.6
Germany	2024 Q2	0.25	2.1	6.7	0.4	18	1.09	1.98	8.8	1.1	50.1
Germany	2024 Q3	0.64	1.2	6.2	1.4	18	1.1	2.02	5.4	2.2	46.5
Germany	2024 Q4	0.35	1.6	6.8	1.1	17	1.11	2.06	4.1	2.2	51.2
Germany	2025 Q1	0.67	2.1	6.4	1.3	18	1.1	2.1	4.1	-0.6	48.3
Germany	2025 Q2	0.95	2.2	6.1	1.1	18	1.1	2.14	6.6	-0.8	48.1
Germany	2025 Q3	0.87	2.3	6.6	0.9	18	1.1	2.18	7.9	-0.9	54.6
Germany	2025 Q4	0.78	1.4	6.8	1.2	18	1.1	2.22	6.8	1.4	57.2
France	2005 Q1	0.47	1	7.4	0.6	12	1.2	2	4.9	-1	48
France	2005 Q2	0.52	1.9	7.5	1.3	13	1.23	2.05	6.3	3.8	47.9
France	2005 Q3	0.64	1	6.7	1	14	1.25	2.1	6.6	5.3	53
France	2005 Q4	0.54	1.8	6.5	1.5	13	1.26	2.15	5.5	2.9	50
France	2006 Q1	0.98	2.4	7.1	1.3	13	1.28	2.2	8.2	0.6	44.9
France	2006 Q2	0.49	1.4	7.5	0.4	12	1.26	2.25	4.8	2.9	55.4
France	2006 Q3	0.63	1.5	7.2	1.3	11	1.27	2.3	4.2	1	54.2
France	2006 Q4	0.07	0.7	7.8	0.5	13	1.32	2.35	4.4	6.6	56
France	2007 Q1	-0.16	1	7.7	0.4	25	1.46	2.4	5	-0.8	51.7
France	2007 Q2	0.48	2.3	6.9	1.5	55	1.55	2.45	8.2	5.8	54.4
France	2007 Q3	0.34	1.6	6.9	1.4	28	1.48	2.5	4.7	3	51.9
France	2007 Q4	0.43	1.9	6.8	0.8	22	1.43	2.55	7	-0.4	54.2
France	2008 Q1	0.33	1	7.1	1.3	17	1.39	2.6	5.7	2.5	48.9
France	2008 Q2	0.27	1.6	7.9	0.6	18	1.35	2.65	6.8	-3.2	47.2
France	2008 Q3	-0.03	1.2	7.2	0	18	1.31	2.7	4.8	0.5	50.8
France	2008 Q4	0.54	1.6	7.6	1.2	20	1.43	2.75	5	1.4	48.6
France	2009 Q1	0.65	0.3	7.5	1	22	1.38	2.8	6.1	3.5	45.1
France	2009 Q2	0.44	1.8	7.1	0.6	19	1.37	2.85	6.3	4.3	57.3
France	2009 Q3	1.19	1.4	7.4	0.6	18	1.3	2.9	6	-1.7	59.6
France	2009 Q4	0.66	2.5	7.6	1.6	19	1.26	2.95	6.1	3.6	47.3
France	2010 Q1	-0.29	2.1	6.8	1.1	20	1.33	3	4.4	2.9	51.7
France	2010 Q2	0.57	0.6	6.9	1.1	22	1.45	3.05	4.7	-1.3	40
France	2010 Q3	0.58	1.6	7.6	0.8	25	1.43	3.1	7.1	1	53.6
France	2010 Q4	0.16	4	7.3	2.1	23	1.38	3.15	5.4	3.1	50.5
France	2011 Q1	0.18	1.9	7.6	1.4	19	1.25	3.2	3.5	9.2	43.6
France	2011 Q2	0.94	1.4	7	0.5	14	1.21	3.25	6.4	-5.7	50.6
France	2011 Q3	-0.39	1.8	6.9	0.2	13	1.23	3.3	6.3	-2.1	46.8
France	2011 Q4	0.38	2.8	7.2	1.6	14	1.29	3.35	7.2	4.5	52.4
France	2012 Q1	0.58	3.4	7.2	0.5	15	1.34	3.4	4.7	0.9	54.5
France	2012 Q2	0.54	1.4	7.5	1.9	13	1.38	3.45	1.8	3.3	52.2
France	2012 Q3	-0.04	2.4	8	1.1	12	1.36	0.1	6.8	-1.3	50.3
France	2012 Q4	0.36	1.8	7.3	1.2	12	1.3	0.14	6.3	0	45.2
France	2013 Q1	0.26	1.7	6	1.7	12	1.2	0.18	5.6	1.1	53.8
France	2013 Q2	-0.03	2.1	7.1	0.1	11	1.13	0.22	5.7	1.9	43.8
France	2013 Q3	0.71	1.9	6.8	2.3	12	1.08	0.26	6.3	1.1	51.1
France	2013 Q4	0.49	2.2	7.8	1.1	13	1.06	0.3	5.5	-2.7	48.9
France	2014 Q1	0.07	2.3	7	0.6	14	1.09	0.34	6.1	-0.8	41.1
France	2014 Q2	0.61	2.4	7.2	1.6	14	1.13	0.38	3.8	0.3	48.9
France	2014 Q3	0.3	2.4	7.2	1.1	21	1.12	0.42	4.5	-1.5	48.3
France	2014 Q4	0.06	2.5	7.4	1.9	20	1.07	0.46	4.5	3.5	45.1
France	2015 Q1	-0.47	2.2	6.5	0.6	18	1.07	0.5	6.4	-0.4	53
France	2015 Q2	0.52	2.9	6.6	0	15	1.12	0.54	8.9	2.4	48.7
France	2015 Q3	1.07	1.5	7.1	-0.2	14	1.18	0.58	7.6	6.2	52.9
France	2015 Q4	0.22	2.4	6.8	0.9	13	1.21	0.62	5.2	-0.8	51.1
France	2016 Q1	0.8	1.4	7.1	1	12	1.13	0.66	5.8	4.1	58.7
France	2016 Q2	-0.38	2	6.7	2.2	11	1.08	0.7	5.1	-1.2	59.8
France	2016 Q3	1.04	3.3	7.1	0.7	12	1.1	0.74	7.3	1.5	57.3
France	2016 Q4	-0.24	1.1	6.8	0.8	14	1.12	0.78	2.6	-2.1	55
France	2017 Q1	0.36	1.2	7	0.8	16	1.17	0.82	5.4	4.4	55.3
France	2017 Q2	0.89	1.5	6.1	1.3	19	1.19	0.86	5.2	2.4	57.2
France	2017 Q3	0.25	1	7.3	1.2	27	1.14	0.9	6.5	1.6	58.1
France	2017 Q4	0.27	0.2	7.2	0.6	30	1.06	0.94	6.6	3.5	48.1
France	2018 Q1	0.2	2.5	6.7	1.2	36	1.09	0.98	5.1	2.7	45.4
France	2018 Q2	-0.15	0.6	7.5	1.8	28	1.22	1.02	8.2	1.1	52.8
France	2018 Q3	0.42	2.2	7	0.3	18	1.2	1.06	7.2	2.5	51.6
France	2018 Q4	0.08	3.2	7	1	17	1.18	1.1	6.9	4	48
France	2019 Q1	-0.03	2	7	1.5	16	1.07	1.14	6.7	-0.2	55.9
France	2019 Q2	0.83	3.7	6.2	1.5	22	1.05	1.18	5.8	4.8	48.2
France	2019 Q3	-0.04	1.9	6.8	0.3	28	1.07	1.22	4.6	1.1	41.9
France	2019 Q4	0.39	0.1	7.8	0.8	30	1.09	1.26	7.2	2	55.2
France	2020 Q1	0.9	1.7	7.2	0.4	29	1.07	1.3	5.3	-1.8	46.4
France	2020 Q2	0.67	1.8	7.6	1.1	27	1.06	1.34	7.1	2.5	56.2
France	2020 Q3	0.55	1.6	7.2	1.1	26	1.05	1.38	9.5	1.9	52.8
France	2020 Q4	0.92	1.9	6.7	1.3	23	1.1	1.42	5.6	-0.1	45.5
France	2021 Q1	0.61	2.2	7	1.1	22	1.12	1.46	5.7	4.3	46.4
France	2021 Q2	0.21	0.8	7.1	1.7	20	1.07	1.5	5.6	4.2	49.1
France	2021 Q3	0.89	1.1	7	-0.2	19	1.07	1.54	4.3	0.7	54.4
France	2021 Q4	0.32	2.8	5.6	1.6	18	1.1	1.58	4.8	2	48.3
France	2022 Q1	0.06	3	6.5	1.1	17	1.08	1.62	7.1	4.8	40.9
France	2022 Q2	0.76	1.8	6.5	1.4	16	1.07	1.66	4.7	5.7	49.8
France	2022 Q3	0.27	1.9	7.2	0.4	18	1.06	1.7	6.4	7.2	51.7
France	2022 Q4	0.23	1.6	6.3	1.3	20	1.07	1.74	3.8	1.5	49.8
France	2023 Q1	0.3	0.6	6.3	0.8	19	1.08	1.78	6.2	1.7	50
France	2023 Q2	0.31	1.3	6.8	1.4	18	1.09	1.82	3	1.9	51.9
France	2023 Q3	0.77	1.7	6.9	1.7	17	1.1	1.86	4.2	1.8	58.7
France	2023 Q4	0.43	0.1	6.3	1.2	16	1.1	1.9	8.3	3.3	44.3
France	2024 Q1	0.22	2.6	7.1	0.7	17	1.09	1.94	3	0	52.8
France	2024 Q2	-0.19	2.2	5.9	0.4	18	1.09	1.98	6.4	1.6	56.5
France	2024 Q3	0.19	1.4	7.4	0.9	18	1.1	2.02	6	1.7	46.4
France	2024 Q4	0.65	2.5	7.1	1.3	17	1.11	2.06	5.8	0.9	52.9
France	2025 Q1	0.52	2.8	7.6	1.2	18	1.1	2.1	6.2	1.2	55.1
France	2025 Q2	-0.39	2.5	6.7	0.5	18	1.1	2.14	7.1	1.8	55.6
France	2025 Q3	0.5	1.3	6.7	1.7	18	1.1	2.18	3.8	-1.5	45.9
France	2025 Q4	0.26	2.4	5.6	0.6	18	1.1	2.22	4.6	1.3	47.9
Italy	2005 Q1	0.5	1.9	7.5	1.4	12	1.2	2	5.9	1.5	53.3
Italy	2005 Q2	0.1	1.7	7.6	0.1	13	1.23	2.05	3.5	3.3	55.7
Italy	2005 Q3	0.27	1.9	7.4	1.1	14	1.25	2.1	6	0.3	57.3
Italy	2005 Q4	0.92	2.1	8.1	0	13	1.26	2.15	6.2	0.2	52.3
Italy	2006 Q1	0.74	2.4	8.3	0.6	13	1.28	2.2	4.9	0.8	51.4
Italy	2006 Q2	0.42	1.9	7.2	0.8	12	1.26	2.25	2.5	3.7	44.5
Italy	2006 Q3	0.07	1	7.1	2	11	1.27	2.3	6.4	0.9	44.9
Italy	2006 Q4	0.34	2.2	7.7	0.5	13	1.32	2.35	2.7	2.8	51
Italy	2007 Q1	0.56	2.6	8	0.5	25	1.46	2.4	8.7	1.7	50.4
Italy	2007 Q2	-0.1	1.5	6.6	0.6	55	1.55	2.45	4.3	0	45.6
Italy	2007 Q3	0.51	2.2	6.7	0.6	28	1.48	2.5	9.2	3.9	52
Italy	2007 Q4	0.35	2.2	7	1	22	1.43	2.55	5.5	-0.7	55.3
Italy	2008 Q1	0.68	1.3	7.2	1.3	17	1.39	2.6	6.8	4.8	54
Italy	2008 Q2	0.19	1.6	7.5	0.7	18	1.35	2.65	4.7	-3.6	52.9
Italy	2008 Q3	0.4	2.1	8.2	2.4	18	1.31	2.7	4	2.9	48.9
Italy	2008 Q4	0.55	2.2	6.4	1.1	20	1.43	2.75	7.6	2.2	52.7
Italy	2009 Q1	-0.46	3.2	7.8	-0.2	22	1.38	2.8	7.1	-0.3	48.8
Italy	2009 Q2	0.09	0.6	8.4	1.5	19	1.37	2.85	6.8	0.5	49.2
Italy	2009 Q3	0.07	3.8	7.5	1.2	18	1.3	2.9	7.3	2.6	49
Italy	2009 Q4	0.26	1.8	7.6	1	19	1.26	2.95	5.5	3.1	42.3
Italy	2010 Q1	0.02	1.6	7.7	0.6	20	1.33	3	5.1	3.3	56.5
Italy	2010 Q2	0.65	1.3	7.5	1.7	22	1.45	3.05	5.5	0.6	52.4
Italy	2010 Q3	-0.25	2	7.1	1.6	25	1.43	3.1	4.2	0.5	47.3
Italy	2010 Q4	0.55	1.2	7.4	0.6	23	1.38	3.15	3.4	1.3	46.9
Italy	2011 Q1	0.18	1.1	7.6	1	19	1.25	3.2	6.3	-0.3	49.9
Italy	2011 Q2	0.38	1.7	7.4	0.6	14	1.21	3.25	6.7	3.7	47.4
Italy	2011 Q3	0.23	1.4	8	1.1	13	1.23	3.3	8.4	3.3	59
Italy	2011 Q4	1.25	2.5	6.9	0.6	14	1.29	3.35	6	1.1	57.4
Italy	2012 Q1	0.71	1.5	7.1	0.9	15	1.34	3.4	7.5	4	49.3
Italy	2012 Q2	0.72	3.2	7.4	1	13	1.38	3.45	5.7	-1.9	51.3
Italy	2012 Q3	0.39	2.4	7	1	12	1.36	0.1	6.3	3.5	50.7
Italy	2012 Q4	0.3	0.7	6.6	2	12	1.3	0.14	6.8	2.9	53.1
Italy	2013 Q1	0.35	1.3	7.7	1.3	12	1.2	0.18	7.2	2.3	55
Italy	2013 Q2	0.02	0.7	7.5	1	11	1.13	0.22	5.5	5.1	47.7
Italy	2013 Q3	1.06	3.1	6.9	0.9	12	1.08	0.26	8.5	0.1	52.5
Italy	2013 Q4	0.7	2.2	7.3	1.4	13	1.06	0.3	4.2	5	45.2
Italy	2014 Q1	0.26	2.8	7	0.3	14	1.09	0.34	5.4	0.5	58.2
Italy	2014 Q2	0.88	1.7	6.9	1.4	14	1.13	0.38	9.3	5.4	52
Italy	2014 Q3	0.63	1.9	6.6	1.6	21	1.12	0.42	4.4	-2.8	51.1
Italy	2014 Q4	0.9	1.4	7.4	1.3	20	1.07	0.46	6.2	3.4	57.6
Italy	2015 Q1	0.37	1.7	6.9	-0.3	18	1.07	0.5	6.7	1.2	49.4
Italy	2015 Q2	0.56	-0.3	7.7	1.5	15	1.12	0.54	7.8	3.8	51.5
Italy	2015 Q3	0.13	1.4	7.3	0.5	14	1.18	0.58	4.3	-3	50.3
Italy	2015 Q4	0.46	1.4	6	0.3	13	1.21	0.62	5.8	4.3	52.3
Italy	2016 Q1	0.45	1.4	7.8	0.8	12	1.13	0.66	6.2	-0.7	48.3
Italy	2016 Q2	0.42	2.1	7	2.1	11	1.08	0.7	6.7	3.3	55.8
Italy	2016 Q3	-0.02	3.2	8.1	0.5	12	1.1	0.74	5.5	1.2	53.1
Italy	2016 Q4	0.2	2.6	6.9	0.8	14	1.12	0.78	6.4	2.4	48.5
Italy	2017 Q1	0.48	1.5	7.3	1.2	16	1.17	0.82	3.6	3	47.4
Italy	2017 Q2	0.32	1.1	7	2.1	19	1.19	0.86	4.9	0.8	58.7
Italy	2017 Q3	0.27	3	6.5	0.2	27	1.14	0.9	7.2	-2.3	53.1
Italy	2017 Q4	0.18	3.1	6.3	0.3	30	1.06	0.94	6.9	0.5	55.5
Italy	2018 Q1	0.91	1.3	6.8	0.4	36	1.09	0.98	3.9	0.1	54.7
Italy	2018 Q2	0.58	1.4	7.2	0.9	28	1.22	1.02	5.5	2.3	53
Italy	2018 Q3	0.9	2	6.9	1.6	18	1.2	1.06	8.3	6.3	52.4
Italy	2018 Q4	0.55	1.7	7	1.1	17	1.18	1.1	7	3.6	48.4
Italy	2019 Q1	0.79	1.9	6.7	1.5	16	1.07	1.14	6.1	1.1	49.8
Italy	2019 Q2	0.17	3.1	6.4	0.5	22	1.05	1.18	4.6	2	48
Italy	2019 Q3	0.41	1.4	6.6	0.8	28	1.07	1.22	3.3	-2.4	49.9
Italy	2019 Q4	1.09	1.6	7.2	1.6	30	1.09	1.26	5	5.4	50.5
Italy	2020 Q1	-0.18	1.1	6.8	0.4	29	1.07	1.3	6.2	4.4	47.8
Italy	2020 Q2	0.25	3.3	6.9	0.5	27	1.06	1.34	2.3	-0.2	57.7
Italy	2020 Q3	0.33	1.9	7.3	0.5	26	1.05	1.38	4.7	-1.1	50.4
Italy	2020 Q4	-0.19	1.4	7.7	1.3	23	1.1	1.42	3.3	2.6	48.3
Italy	2021 Q1	0.44	2.4	7.3	1	22	1.12	1.46	5.6	-0.1	45.3
Italy	2021 Q2	0.09	-0.4	6.9	1.4	20	1.07	1.5	3.6	0.9	52.4
Italy	2021 Q3	0.19	1.7	6.7	1	19	1.07	1.54	4.9	4.7	45.6
Italy	2021 Q4	0.46	2	6.8	1.5	18	1.1	1.58	6.4	2.1	55.6
Italy	2022 Q1	0.57	2.2	7.4	0.8	17	1.08	1.62	5	1.4	60.6
Italy	2022 Q2	0.96	2.6	6.8	0.7	16	1.07	1.66	6.5	3.1	47.4
Italy	2022 Q3	0.04	2.4	7.5	2.1	18	1.06	1.7	4	1.1	51.2
Italy	2022 Q4	-0.01	2.4	7.4	2	20	1.07	1.74	1.6	2.9	46.8
Italy	2023 Q1	0.48	2	6.9	1	19	1.08	1.78	7.8	-0.7	50.2
Italy	2023 Q2	0.77	1.3	6.5	1.1	18	1.09	1.82	8.8	-1	49.3
Italy	2023 Q3	0.73	1.3	6	1	17	1.1	1.86	6.8	3.4	53
Italy	2023 Q4	0.33	0.7	7	0.3	16	1.1	1.9	4	5.2	54.2
Italy	2024 Q1	0.86	2.3	6.5	1.2	17	1.09	1.94	5.5	0.6	51.6
Italy	2024 Q2	0.4	2.8	6.4	1.7	18	1.09	1.98	4.2	-3.3	48.2
Italy	2024 Q3	0.75	1.2	7.2	0.7	18	1.1	2.02	6.5	0.3	54.1
Italy	2024 Q4	0.65	2	7.1	0.6	17	1.11	2.06	7.1	0.9	57.3
Italy	2025 Q1	0.73	1.4	6.6	1.2	18	1.1	2.1	4.3	-1.4	48.5
Italy	2025 Q2	0.93	3.4	6.2	1.5	18	1.1	2.14	5	2.9	52.1
Italy	2025 Q3	0.68	0.4	6.5	1.5	18	1.1	2.18	7.4	2.1	50.4
Italy	2025 Q4	0.47	3	6.4	0.6	18	1.1	2.22	6.6	-0.4	49.9
Spain	2005 Q1	0.89	2.6	8.3	1.1	12	1.2	2	5.5	2.7	52
Spain	2005 Q2	0.17	1.1	7.1	0.3	13	1.23	2.05	5.7	2.3	49.1
Spain	2005 Q3	0.91	1.5	7.7	0.8	14	1.25	2.1	6.5	0.7	52.2
Spain	2005 Q4	0.11	1.6	7.2	1.7	13	1.26	2.15	7.1	-2.2	54.4
Spain	2006 Q1	0.38	1.8	7.4	1.8	13	1.28	2.2	4.6	0.2	55.5
Spain	2006 Q2	0.18	1.8	7.3	1.3	12	1.26	2.25	3.4	1.6	51.8
Spain	2006 Q3	0.37	0.5	7.6	0.7	11	1.27	2.3	5	1.7	49.4
Spain	2006 Q4	0.92	1.4	7	0.2	13	1.32	2.35	4.1	2	48.4
Spain	2007 Q1	0.47	1.6	7.8	1.4	25	1.46	2.4	6.8	1	56.8
Spain	2007 Q2	0.42	1.9	7.1	0.7	55	1.55	2.45	5	1.9	52.6
Spain	2007 Q3	1.07	1.1	7.6	1.2	28	1.48	2.5	3.9	2.1	52
Spain	2007 Q4	-0.07	1.6	8	0.5	22	1.43	2.55	5.7	0.7	45.5
Spain	2008 Q1	0.48	0.3	7.1	1.8	17	1.39	2.6	6.3	2.2	47.3
Spain	2008 Q2	0.17	1.7	7.7	0.4	18	1.35	2.65	4.7	-0.4	55.9
Spain	2008 Q3	0.5	3.3	7.2	0.7	18	1.31	2.7	6	4.5	49.6
Spain	2008 Q4	0.11	3.4	6.9	1.5	20	1.43	2.75	8.3	-0.8	50.9
Spain	2009 Q1	0.86	0.3	6.9	1.2	22	1.38	2.8	5.1	3.4	58.7
Spain	2009 Q2	0.7	2.4	7.5	0.9	19	1.37	2.85	5.4	1.2	50.1
Spain	2009 Q3	0.67	1.7	7.7	1.6	18	1.3	2.9	7	-1.1	49.4
Spain	2009 Q4	-0.28	3.3	7.5	1	19	1.26	2.95	7.2	-0.5	53.9
Spain	2010 Q1	0.52	3.1	6.9	1.2	20	1.33	3	3.3	6.5	43.3
Spain	2010 Q2	0.3	2.1	6.9	1.7	22	1.45	3.05	7	-1	41.1
Spain	2010 Q3	0.77	1.7	7.8	0.4	25	1.43	3.1	6.8	3.9	50.5
Spain	2010 Q4	0.36	0.8	7.2	1	23	1.38	3.15	4.6	4.2	46
Spain	2011 Q1	-0.16	1.7	6.8	0.8	19	1.25	3.2	5.5	-0.6	54.4
Spain	2011 Q2	0.39	2.9	7.1	1.2	14	1.21	3.25	4.8	6.8	50.2
Spain	2011 Q3	1.15	0.9	7.7	1.2	13	1.23	3.3	3.4	0.8	52.3
Spain	2011 Q4	0.51	1.5	7.2	1	14	1.29	3.35	6.2	-0.1	56.9
Spain	2012 Q1	0.25	1.9	6.8	0.9	15	1.34	3.4	5.7	-0.6	53.6
Spain	2012 Q2	1.55	1.8	7.1	1.1	13	1.38	3.45	7.8	0.9	59.4
Spain	2012 Q3	1.47	3.1	7.1	1.3	12	1.36	0.1	6.8	2.4	56.8
Spain	2012 Q4	0.16	1.5	7.8	1.1	12	1.3	0.14	5.2	-1.4	48.7
Spain	2013 Q1	0.65	1.3	7.7	1.6	12	1.2	0.18	7	3	49.4
Spain	2013 Q2	0.94	0.3	7.2	0.7	11	1.13	0.22	4.7	0.6	49.3
Spain	2013 Q3	0.88	2.6	7.1	1	12	1.08	0.26	3.8	1.1	52.3
Spain	2013 Q4	1.04	1.6	7.2	0.3	13	1.06	0.3	5.1	0.2	59.1
Spain	2014 Q1	0.93	0.4	6.6	0.9	14	1.09	0.34	7	1.2	48.4
Spain	2014 Q2	-0.23	0.9	7.5	0.8	14	1.13	0.38	6.5	0.1	48.9
Spain	2014 Q3	0.69	1.2	7.4	1.1	21	1.12	0.42	4.9	2.1	52.7
Spain	2014 Q4	0.38	2.3	7.1	1.4	20	1.07	0.46	7.7	3.3	52
Spain	2015 Q1	0.02	2.2	7.1	1.3	18	1.07	0.5	6.5	1.8	54.7
Spain	2015 Q2	0.51	2.1	6.3	1.4	15	1.12	0.54	5	1.8	47.1
Spain	2015 Q3	-0.06	2.4	6.6	0.7	14	1.18	0.58	6.4	0.7	54.2
Spain	2015 Q4	0.61	1.2	6.6	1.4	13	1.21	0.62	4.3	3.1	56.7
Spain	2016 Q1	-0.02	3.4	7.4	1.1	12	1.13	0.66	6.6	4.1	41.6
Spain	2016 Q2	1.01	2.1	7.1	1	11	1.08	0.7	4.8	-0.8	55.3
Spain	2016 Q3	0.79	0.7	7	1.3	12	1.1	0.74	5.8	0.9	54.9
Spain	2016 Q4	-0.15	2.3	6.8	0.7	14	1.12	0.78	8.6	2.5	54.5
Spain	2017 Q1	0.46	2.8	7.2	1	16	1.17	0.82	7	-1.3	52.7
Spain	2017 Q2	0.44	0.9	7.5	0.6	19	1.19	0.86	4.7	3.8	46.3
Spain	2017 Q3	0.42	1.9	7.1	0.4	27	1.14	0.9	4.7	2.2	45.6
Spain	2017 Q4	0.22	1.8	6.7	0.9	30	1.06	0.94	3.8	1.2	50.1
Spain	2018 Q1	-0.49	1.6	7.1	0.9	36	1.09	0.98	5.7	0	50.1
Spain	2018 Q2	0.45	1.6	7.4	0.6	28	1.22	1.02	7	4.5	57.6
Spain	2018 Q3	0.01	1.6	6.8	1.3	18	1.2	1.06	3.9	0.7	45.6
Spain	2018 Q4	0.03	3.6	6.2	1.3	17	1.18	1.1	7.8	0	46.3
Spain	2019 Q1	0.6	1.7	6.9	1.5	16	1.07	1.14	8	-1.5	59.4
Spain	2019 Q2	0.09	0.9	6.8	1.3	22	1.05	1.18	6.8	2.3	56.2
Spain	2019 Q3	0.22	1.7	7	1.4	28	1.07	1.22	6.6	1.5	50.5
Spain	2019 Q4	0.18	0.1	6.6	1.4	30	1.09	1.26	5.7	1.4	53.3
Spain	2020 Q1	0.97	1.9	6.8	1	29	1.07	1.3	4	-1.5	50.8
Spain	2020 Q2	0.53	3.1	6.8	0.8	27	1.06	1.34	4.3	1.4	48.5
Spain	2020 Q3	0.19	1.3	6.9	0	26	1.05	1.38	5.6	0.3	51
Spain	2020 Q4	0.63	1.9	7.3	1.5	23	1.1	1.42	4.7	1.5	54.3
Spain	2021 Q1	0.92	0.9	6.3	1.2	22	1.12	1.46	5.1	-0.5	44.5
Spain	2021 Q2	1.27	1.7	7.2	1.5	20	1.07	1.5	5.3	3.4	54
Spain	2021 Q3	0.72	2	7.5	0.3	19	1.07	1.54	6.2	-2.1	55.7
Spain	2021 Q4	1.13	2.7	7.1	1.7	18	1.1	1.58	6	4.3	44.4
Spain	2022 Q1	0.7	1.7	6.6	1.1	17	1.08	1.62	6.3	-1.8	51.7
Spain	2022 Q2	-0.07	0.9	7	0.1	16	1.07	1.66	5.2	0.6	51.8
Spain	2022 Q3	0.6	3.2	7	1	18	1.06	1.7	6	1.2	48.1
Spain	2022 Q4	0.95	2.3	6.4	1	20	1.07	1.74	4.3	0.6	44.6
Spain	2023 Q1	0.15	1.3	6.3	0.9	19	1.08	1.78	5.5	-0.6	56.5
Spain	2023 Q2	0.51	1.2	7.6	0.4	18	1.09	1.82	6.1	1.4	49.6
Spain	2023 Q3	0.06	2.3	7.4	0.4	17	1.1	1.86	8.6	3.8	56.4
Spain	2023 Q4	0.32	0.4	6.5	0.6	16	1.1	1.9	4.5	1	43.8
Spain	2024 Q1	0.99	1.5	6.7	0.7	17	1.09	1.94	3.5	4.6	49.2
Spain	2024 Q2	0.44	1.5	7.1	1.4	18	1.09	1.98	4.7	-1	44.6
Spain	2024 Q3	0.51	1.1	6.4	0.3	18	1.1	2.02	4.2	1.6	56.4
Spain	2024 Q4	0.57	3.5	6.8	2.1	17	1.11	2.06	5.7	-1.9	47.4
Spain	2025 Q1	0.08	1.3	6.4	1.5	18	1.1	2.1	7.5	0.4	56.6
Spain	2025 Q2	0.12	1	6.6	0.4	18	1.1	2.14	6.4	3.6	56.2
Spain	2025 Q3	0.32	1	5.9	1.2	18	1.1	2.18	6	2	47
Spain	2025 Q4	0.65	1.4	6	1.7	18	1.1	2.22	8.2	-0.7	51.2
